# Supplementary material
Source: publisher figshare collection journal article supplement (https://acs.figshare.com/ndownloader/files/9963310)
Supplement: Supplementary file 1 [file 9963310]

# An Asymmetric Dehydrogenative Diels–Alder Reaction for the Synthesis of Chiral Tetrahydrocarbazole Derivatives

Xiang Wu,<sup>\*,†</sup> Hai-Jie Zhu,<sup>†</sup> Shi-Bao Zhao,<sup>†</sup> Shu-Sen Chen,<sup>‡</sup> Yun-Fei Luo,<sup>†</sup> and  
You-Gui Li<sup>†</sup>

<sup>†</sup>Anhui Province Key Laboratory of Advanced Catalytic Materials and Reaction Engineering, School of Chemistry and Chemical Engineering, Hefei University of Technology, Hefei 230009, China.

<sup>‡</sup>Department of Chemistry, University of Science and Technology of China, Hefei 230026, China

|                                                                                 |     |
|---------------------------------------------------------------------------------|-----|
| 1. General Data .....                                                           | S2  |
| 2. Screening of palladium species and oxophilic Lewis acids .....               | S3  |
| 3. General procedure for the asymmetric synthesis of tetrahydrocarbazoles ..... | S4  |
| 4. 1 mmol-scale reaction of 2a with 3a .....                                    | S5  |
| 5. Product derivatization .....                                                 | S6  |
| 6. Characterization Data for the Products .....                                 | S7  |
| 7. X-ray Single Crystal Data for 4aa .....                                      | S24 |
| 8. <sup>1</sup> H NMR and <sup>13</sup> C NMR Spectra for the Product .....     | S26 |
| 9. HPLC Analysis for Pruduct.....                                               | S59 |

## 1. General Data

NMR spectra were recorded on Agilent-600 MHz or Bruker-400 MHz spectrometer. Mass spectra were recorded on a Thermo LTQ Orbitrap XL (ESI+) or a P-SIMS-Gly of Bruker Daltonics Inc (EI+). HPLC analysis was performed on Waters 2489, 2487 and Agilent 1200 (UV detection monitored at 254 nm). Chiralpak OD-H, AD-H, columns were purchased from Daicel Chemical Industries, LTD. Optical rotations were measured on Perkin Elmer Model 343 Polarimeter. UV detection was monitored at 220 nm. Column chromatography was performed on silica gel (200-300 mesh) eluting with ethyl acetate and petroleum ether. TLC was performed on glass-backed silica plates. All chemicals were used without purification as commercially available unless otherwise noted. Indole substrates were prepared according to the literature procedures<sup>[1,2]</sup>. Cinnamic aldehyde substrates were prepared according to the literature procedures<sup>[3]</sup>.  $\alpha,\alpha$ -Diarylprolinol ethers were synthesized according to the literature procedures<sup>[4]</sup>.

---

<sup>1</sup> L.-L. Cao, D.-S. Wang, G.-F. Jiang, Y.-G. Zhou, *Tetrahedron Lett.* **2011**, 52, 2837-2839.

<sup>2</sup> S. L. Zhang, Z. L. Yu, *Org. Biomol. Chem.* **2016**, 14, 10511-10515.

<sup>3</sup> A. Schmidt, G. Hilt, *Org. Lett.* **2013**, 15, 2708-2711.

<sup>4</sup> M. Marigo, T. C. Wabnitz, D. Fielenbach, K. A. Jorgensen, *Angew. Chem. Int. Ed.* **2005**, 44, 794-797.

## 2. Screening of palladium species and oxophilic Lewis acids

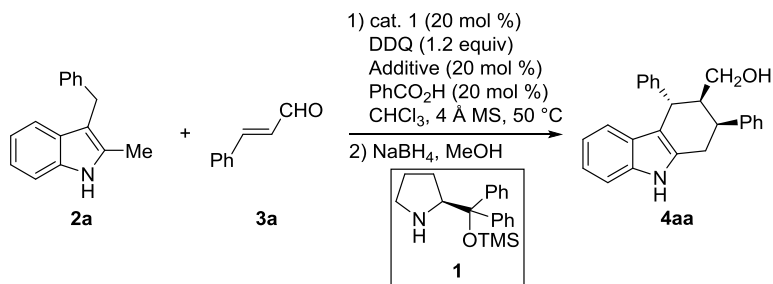

| entry | additive                           | yield(%) | dr    | ee |
|-------|------------------------------------|----------|-------|----|
| 1     | Pd(OAc) <sub>2</sub>               | 70       | >10:1 | 98 |
| 2     | PdCl <sub>2</sub>                  | 11       | >10:1 | ND |
| 3     | Pd(PPh <sub>3</sub> ) <sub>4</sub> | 51       | >10:1 | 93 |
| 4     | Pd(acac) <sub>2</sub>              | 60       | >10:1 | 99 |
| 5     | Pd <sub>2</sub> (dba) <sub>3</sub> | 57       | >10:1 | 80 |
| 6     | SingaCyCle(TM)-A1                  | 18       | >10:1 | 96 |
| 7     | AlCl <sub>3</sub>                  | 33       | >10:1 | 98 |
| 8     | BF <sub>3</sub> ·Et <sub>2</sub> O | trace    |       |    |

Reaction conditions: **2a** (0.15 mmol), **3a** (0.3 mmol), benzoic acid (0.03 mmol), catalyst **1** (0.03 mmol), **Additive** (0.03 mmol), DDQ (0.18 mmol), 4 Å MS (50 mg) in CHCl<sub>3</sub> (1.0 mL) under N<sub>2</sub> at 50 °C for 72 h.

Several palladium species were screened. Pd(OAc)<sub>2</sub> performed better than other species (entry 1 vs entries 2-6). AlCl<sub>3</sub> could improve the diastereoselectivity to >10:1 and maintain the enantioselectivity, however the yield decreased to 33%. When BF<sub>3</sub>·Et<sub>2</sub>O was added to the reaction system, there is no obvious product and the starting material **2a** decomposed.

### 3. General procedure for the asymmetric synthesis of tetrahydrocarbazoles

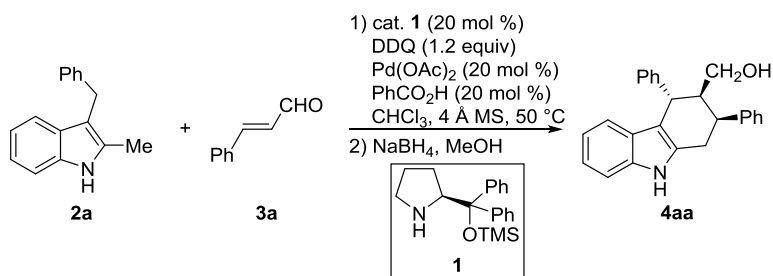

3-Benzyl-2-methyl-1H-indole **2a** (33 mg, 0.15 mmol), DDQ (41 mg, 0.18 mmol), PhCO<sub>2</sub>H (3.7 mg, 0.03 mmol), Pd(OAc)<sub>2</sub> (7.3 mg, 0.03 mmol), 4 Å (50 mg) and catalyst **1** (9.8 mg, 0.03 mmol) were added in an oven-dried Schlenk tube. The tube was then sealed, evacuated, and backfilled with nitrogen using standard Schlenk technique. CHCl<sub>3</sub> (1 mL) and Cinnamic aldehyde (40 mg, 0.3 mmol), were sequentially added by syringe at ambient temperature. The resulting mixture was heated to 50 °C (oil bath) for 72 hours. Solvents were evaporated under reduced pressure. The residue was directed purified by column chromatography on silica gel (petroleum ether/EtOAc = 30/1 to 20/1) to afford crude aldehyde compound. The D-A product was dissolved in MeOH, then NaBH<sub>4</sub> (1.2 equiv.) was added. After the reaction was completed (monitored by TLC), the solvent was evaporated and the residue was purified by column chromatography on silica gel (petroleum ether/EtOAc=8/1 to 5/1) to afford separable pure product **4aa**.

#### 4. 1 mmol-scale reaction of **2a** with **3a**

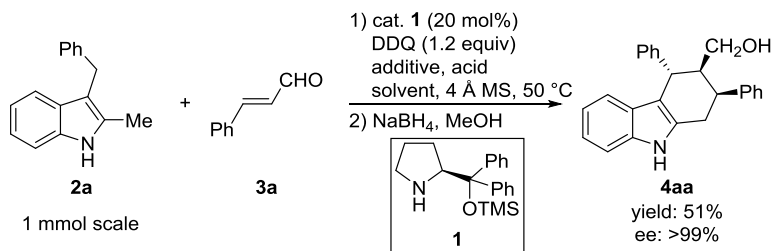

A 1 mmol scale reaction of **2a** with **3a** was performed smoothly to give the product in slightly decreased yield (51%) and excellent enantioselectivity (>99% ee).

3-Benzyl-2-methyl-1H-indole **2a** (221 mg, 1.0 mmol), DDQ (272 mg, 1.2 mmol), PhCO<sub>2</sub>H (22.4 mg, 0.2 mmol), Pd(OAc)<sub>2</sub> (44.8 mg, 0.2 mmol), 4 Å (350 mg) and catalyst **1** (65 mg, 0.2 mmol) were added in an oven-dried Schlenk tube. The tube was then sealed, evacuated, and backfilled with nitrogen using standard Schlenk technique. CHCl<sub>3</sub> (7 mL) and Cinnamic aldehyde (264 mg, 2.0 mmol), were sequentially added by syringe at ambient temperature. The resulting mixture was heated to 50 °C (oil bath) for 72 hours. Solvents were evaporated under reduced pressure. The residue was directed purified by column chromatography on silica gel (petroleum ether/EtOAc = 30/1 to 20/1) to afford crude aldehyde compound. The D-A product was dissolved in MeOH, then NaBH<sub>4</sub> (1.2 equiv.) was added. After the reaction was completed (monitored by TLC), the solvent was evaporated and the residue was purified by column chromatography on silica gel (petroleum ether/EtOAc=8/1 to 5/1) to afford separable pure product **4aa**.

## 5. Product derivatization

Diversity-oriented derivatization of the cycloaddition products was conducted. A Wittig reaction of unstable **4aa'** with methyl (triphenylphosphoranylidene) acetate gave the E-selective unsaturated ester **D1**. In the presence of 4-bromobenzoyl chloride and pyridine, esterification of **4aa** afforded the **D2** in 65% yield (Scheme 4).

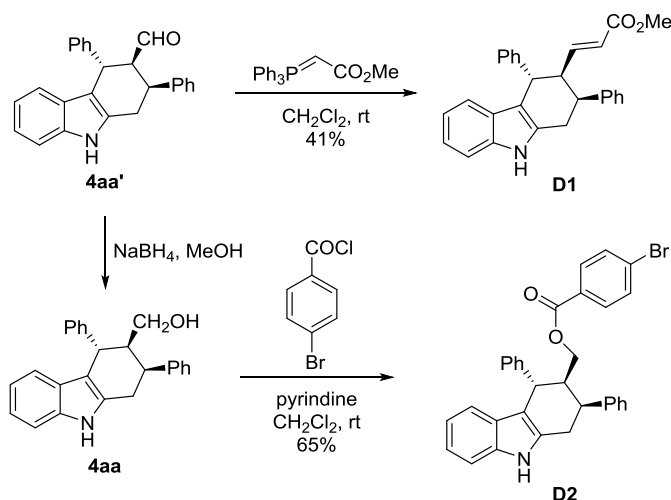

((2R,3R,4R)-2,4-diphenyl-2,3,4,9-tetrahydro-1H-carbazole-3-carbaldehyde (**4aa'**) (52 mg, 0.15 mmol) was dissolved in  $\text{CH}_2\text{Cl}_2$  (1 mL), then  $\text{Ph}_3\text{P}=\text{CHCO}_2\text{Me}$  (100 mg, 2.0 equiv) was added. After the reaction was completed (monitored by TLC), the solvent was evaporated and the residue was purified by column chromatography on silica gel to afford separable pure product **D1** (25 mg, 41% yield).

((2R,3R,4R)-2,4-diphenyl-2,3,4,9-tetrahydro-1H-carbazol-3-yl)methanol (**4aa**) (67 mg, 0.2 mmol), pyridine (79 mg, 5.0 equiv) and DMAP (2.4 mg, 0.1 equiv) was dissolved in toluene, then 4-bromobenzoyl chloride (131.4 mg, 3.0 equiv) was added. The reaction was stirred at 50 °C. After the reaction was completed (monitored by TLC), the mixture was cooled to room temperature and extracted with dichloromethane. Then, the combined organic layer was dried by anhydrous sodium sulfate. After concentration under vacuum, the crude product was purified by flash chromatography on silica gel to afford the product **D2** (70 mg, 41% yield).

## 6. Characterization Data for the Products

### ((2S,3S,4S)-2,4-diphenyl-2,3,4,9-tetrahydro-1H-carbazol-3-yl)methanol (4aa)

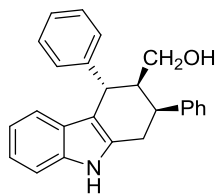

**4aa** (39 mg) was obtained as a white semisolid in 74% yield after flash chromatography and the enantiomeric excess was determined to be 99% by HPLC analysis on Chiralpak AD-H column (20% 2-propanol/n-hexane, 1 mL/min), UV 254 nm,  $t$  (major) = 10.52 min,  $t$  (minor) = 15.54 min;  $[\alpha]_D^{20} = +12.0$  (c 0.05,  $\text{CHCl}_3$ );  $^1\text{H}$  NMR (400 MHz,  $\text{CDCl}_3$ )  $\delta$  7.91 (s, 1H), 7.34 – 7.17 (m, 9H), 7.16 – 7.06 (m, 3H), 6.88 (m, 1H), 6.81 (d,  $J = 7.8$  Hz, 1H), 4.12 (d,  $J = 4.4$  Hz, 1H), 3.62 (dd,  $J = 3.2$  Hz, 1H), 3.54 (dd,  $J = 10.5$ , 6.8 Hz, 1H), 3.47 (dd,  $J = 10.4$ , 6.8 Hz, 1H), 3.23 (dd,  $J = 16.5$ , 5.9 Hz, 1H), 3.08 (dd,  $J = 16.5$ , 6.8 Hz, 1H), 2.46 – 2.37 (m, 1H).  $^{13}\text{C}$  NMR (101 MHz,  $\text{CDCl}_3$ )  $\delta$  144.46, 142.54, 136.44, 134.25, 128.76, 128.48, 128.37, 128.12, 127.43, 126.64, 126.33, 121.29, 119.29, 119.21, 111.21, 110.51, 61.69, 50.89, 39.97, 37.94, 26.65. HRMS (ESI)  $m/z$  ( $\text{M}+\text{H}$ ) $^+$  calculated for  $\text{C}_{25}\text{H}_{24}\text{NO}$ : 354.1858, observed: 354.1858.

### ((2S,3S,4S)-2-phenyl-4-(o-tolyl)-2,3,4,9-tetrahydro-1H-carbazol-3-yl)methanol (4ba)

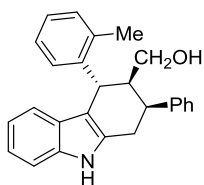

**4ba** (36 mg) was obtained as a white semisolid in 66% yield after flash chromatography and the enantiomeric excess was determined to be 94% by HPLC analysis on Chiralpak AD-H column (15% 2-propanol/n-hexane, 1 mL/min), UV 254 nm,  $t$  (major) = 23.17 min,  $t$  (minor) = 9.83 min;  $[\alpha]_D^{20} = +4.3$  (c 0.054,  $\text{CHCl}_3$ );  $^1\text{H}$  NMR (600 MHz,  $\text{CDCl}_3$ )  $\delta$  7.93 (s, 1H), 7.33 (d,  $J = 8.1$  Hz, 1H), 7.28-7.24 (m, 2H), 7.22-7.20 (m, 4H), 7.11 (m, 3H), 7.04 (t,  $J = 7.4$  Hz, 1H), 6.88 (t,  $J = 7.5$  Hz, 1H), 6.77 (d,  $J = 7.9$  Hz, 1H), 4.51 (d,  $J = 5.2$  Hz, 1H), 3.66 (q,  $J = 6.2$  Hz, 1H), 3.56 (dd,  $J = 11.5$ , 5.4 Hz, 1H), 3.46 (dd,  $J = 11.5$ , 6.3 Hz, 1H), 3.27 (dd,  $J = 16.8$ , 5.8 Hz, 1H), 3.09 (dd,  $J = 16.9$ , 5.8 Hz, 1H), 2.65 – 2.57 (m, 1H), 2.40 (s, 3H).  $^{13}\text{C}$  NMR (151 MHz,  $\text{CDCl}_3$ )  $\delta$  146.90, 142.46, 138.87, 136.30, 133.40, 132.36, 131.26, 130.11, 129.69, 129.15, 129.03, 128.45, 123.85, 122.23, 121.70, 114.47, 113.11, 66.10, 49.47, 42.15, 37.85, 22.37. HRMS (ESI)  $m/z$  ( $\text{M}+\text{H}$ ) $^+$  calculated for  $\text{C}_{26}\text{H}_{26}\text{NO}$ : 368.2009,

observed: 368.2007.

**((2S,3S,4S)-2-phenyl-4-(m-tolyl)-2,3,4,9-tetrahydro-1H-carbazol-3-yl)methanol (4ca)**

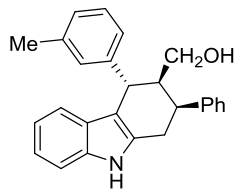

**4ca** (39 mg) was obtained as a white semisolid in 72% yield after flash chromatography and the enantiomeric excess was determined to be 98% by HPLC analysis on Chiralpak OD-H column (15% 2-propanol/n-hexane, 1 mL/min), UV 254 nm,  $t$  (major) = 10.54 min,  $t$  (minor) = 18.43 min;  $[\alpha]_D^{20} = +13.9$  (c 0.122,  $\text{CHCl}_3$ );  $^1\text{H}$  NMR (600 MHz,  $\text{CDCl}_3$ )  $\delta$  7.93 (s, 1H), 7.34 (d,  $J = 8.1$  Hz, 1H), 7.27 – 7.21 (m, 3H), 7.15 (t,  $J = 7.3$  Hz, 3H), 7.10 (t,  $J = 7.5$  Hz, 1H), 7.04 (d,  $J = 9.6$  Hz, 2H), 6.98 (d,  $J = 7.5$  Hz, 1H), 6.89 (t,  $J = 7.4$  Hz, 1H), 6.84 (d,  $J = 7.2$  Hz, 1H), 4.08 (brs, 1H), 3.65–3.63 (m, 1H), 3.56–3.53 (m, 1H), 3.51 – 3.46 (m, 1H), 3.28 (dd,  $J = 16.4, 5.6$  Hz, 1H), 3.11 (dd,  $J = 16.4, 6.6$  Hz, 1H), 2.47 – 2.38 (m, 1H), 2.29 (s, 3H).  $^{13}\text{C}$  NMR (151 MHz,  $\text{CDCl}_3$ )  $\delta$  147.01, 145.19, 140.46, 139.05, 136.80, 132.06, 131.09, 130.83, 130.77, 130.12, 129.77, 129.25, 128.49, 123.85, 121.93, 121.88, 113.10, 64.45, 53.41, 42.61, 40.60, 32.40, 24.21. HRMS (ESI)  $m/z$  ( $\text{M}+\text{H}$ ) $^+$  calculated for  $\text{C}_{26}\text{H}_{26}\text{NO}$ : 368.2009, observed: 368.2012.

**((2S,3S,4S)-2-phenyl-4-(p-tolyl)-2,3,4,9-tetrahydro-1H-carbazol-3-yl)methanol (4da)**

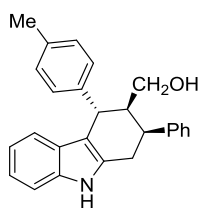

**4da** (37 mg) was obtained as a white semisolid in 67% yield after flash chromatography and the enantiomeric excess was determined to be 91% by HPLC analysis on Chiralpak OD-H column (15% 2-propanol/n-hexane, 1 mL/min), UV 254 nm,  $t$  (major) = 12.39 min,  $t$  (minor) = 17.52 min;  $[\alpha]_D^{20} = +12.5$  (c 0.08,  $\text{CHCl}_3$ );  $^1\text{H}$  NMR (600 MHz,  $\text{CDCl}_3$ )  $\delta$  7.92 (s, 1H), 7.33 (d,  $J = 8.1$  Hz, 1H), 7.28 – 7.19 (m, 3H), 7.16 (d,  $J = 7.2$  Hz, 2H), 7.12 – 7.06 (m, 5H), 6.90 (t,  $J = 7.4$  Hz, 1H), 6.85 (d,  $J = 7.6$  Hz, 1H), 4.10 (brs, 1H), 3.63–3.62 (m, 1H), 3.57 (dd,  $J = 10.7, 6.7$  Hz, 1H), 3.49 (dd,  $J = 10.6, 6.7$  Hz, 1H), 3.26 (dd,  $J = 16.4, 5.6$  Hz, 1H), 3.11 (dd,  $J = 16.4, 6.8$  Hz, 1H), 2.41–2.37 (m,



1H), 2.33 (s, 3H). <sup>13</sup>C NMR (101 MHz, CDCl<sub>3</sub>) δ 142.60, 141.31, 136.42, 135.71, 134.15, 129.06, 128.58, 128.43, 128.11, 127.49, 126.58, 121.24, 119.26, 119.25, 110.45, 61.82, 50.91, 39.58, 37.99, 21.11. HRMS (ESI) m/z (M+H)<sup>+</sup> calculated for C<sub>26</sub>H<sub>26</sub>NO: 368.2009, observed: 368.2004.

**((2S,3S,4R)-4-(2-chlorophenyl)-2-phenyl-2,3,4,9-tetrahydro-1H-carbazol-3-yl)methanol (4ea)**

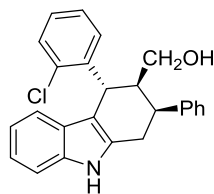

**4ea** (41 mg) was obtained as a white solid in 71% yield after flash chromatography and the enantiomeric excess was determined to be more than 99% by HPLC analysis on Chiralpak OD-H column (15% 2-propanol/n-hexane, 1 mL/min), UV 254 nm, t (major) = 27.14 min, t (minor) = 16.42 min; [α]<sub>D</sub><sup>20</sup> = +5.71 (c 0.07, CHCl<sub>3</sub>); <sup>1</sup>H NMR (400 MHz, CDCl<sub>3</sub>) δ 7.89 (s, 1H), 7.44-7.42 (m, 1H), 7.34 – 7.28 (m, 3H), 7.28 – 7.22 (m, 3H), 7.21 – 7.06 (m, 4H), 6.94 (m, 2H), 5.02 (d, *J* = 5.5 Hz, 1H), 3.56-3.55 (m, 1H), 3.48 -3.46(m, 1H), 3.31 (dd, *J* = 11.9, 6.5 Hz, 1H), 3.25 (d, *J* = 5.8 Hz, 1H), 3.13 (dd, *J* = 16.8, 8.1 Hz, 1H), 2.77 m, 1H). <sup>13</sup>C NMR (151 MHz, CDCl<sub>3</sub>) δ 146.46, 142.19, 138.88, 136.55, 136.47, 134.22, 132.35, 131.37, 130.44, 130.32, 129.40, 129.37, 129.31, 124.12, 121.99, 121.61, 114.29, 113.11, 65.79, 49.18, 41.81, 38.50. HRMS (ESI) m/z (M+H)<sup>+</sup> calculated for C<sub>25</sub>H<sub>23</sub>ClNO: 388.1463, observed: 388.1465.

**((2S,3S,4S)-4-(3-chlorophenyl)-2-phenyl-2,3,4,9-tetrahydro-1H-carbazol-3-yl)methanol (4fa)**

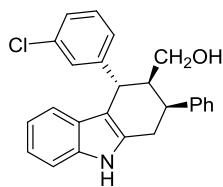

**4fa** (39 mg) was obtained as a white semisolid in 68% yield after flash chromatography and the enantiomeric excess was determined to be 99% by HPLC analysis on Chiralpak OD-H column (15% 2-propanol/n-hexane, 1 mL/min), UV 254 nm, t (major) = 11.52min, t (minor) = 22.46 min; [α]<sub>D</sub><sup>20</sup> = +13.0 (c 0.10, CHCl<sub>3</sub>); <sup>1</sup>H NMR (400 MHz, CDCl<sub>3</sub>) δ 7.93 (s, 1H), 7.33 (d, *J* = 8.1 Hz, 1H), 7.30 – 7.16 (m, 6H), 7.13-7.10 (m, 4H), 6.97 – 6.79 (m, 2H), 4.17 (brs, 1H), 3.59-3.57 (m, 1H), 3.56 – 3.44 (m, 2H), 3.21 (dd, *J* = 16.4, 5.8 Hz, 1H), 3.08 (dd, *J* = 16.5, 7.4 Hz, 1H), 2.44 – 2.30 (m, 1H). <sup>13</sup>C NMR (151 MHz, CDCl<sub>3</sub>) δ 149.53, 144.88, 139.06, 137.03, 136.83, 132.26, 131.35,

131.16, 130.65, 129.85, 129.63, 129.36, 129.24, 124.10, 122.09, 121.62, 113.23, 63.89, 53.52, 42.31, 40.35, 32.39. HRMS (ESI)  $m/z$  (M+H)<sup>+</sup> calculated for C<sub>25</sub>H<sub>23</sub>ClNO: 388.1463, observed: 388.1461.

**((2S,3S,4S)-4-(4-chlorophenyl)-2-phenyl-2,3,4,9-tetrahydro-1H-carbazol-3-yl)methanol (4ga)**

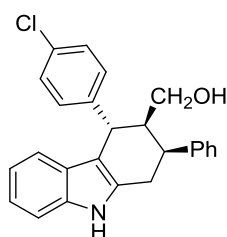

**4ga** (42 mg) was obtained as a white semisolid in 73% yield after flash chromatography and the enantiomeric excess was determined to be 99% by HPLC analysis on Chiralpak OD-H column (15% 2-propanol/n-hexane, 1 mL/min), UV 254 nm,  $t$  (major) = 12.73 min,  $t$  (minor) = 24.99 min;  $[\alpha]_D^{20} = +14.9$  (c 0.134, CHCl<sub>3</sub>); <sup>1</sup>H NMR (600 MHz, CDCl<sub>3</sub>)  $\delta$  7.97 (s, 1H), 7.35 (d,  $J$  = 8.1 Hz, 1H), 7.31 – 7.20 (m, 5H), 7.17 – 7.12 (m, 5H), 6.94 (t,  $J$  = 7.4 Hz, 1H), 6.86 (d,  $J$  = 6.9 Hz, 1H), 4.18 (brs, 1H), 3.59–3.58 (m, 1H), 3.55–3.53 (m, 1H), 3.52 – 3.47 (m, 1H), 3.23 (dd,  $J$  = 16.2, 5.1 Hz, 1H), 3.11 (dd,  $J$  = 16.4, 7.3 Hz, 1H), 2.40 – 2.31 (m, 1H). <sup>13</sup>C NMR (151 MHz, CDCl<sub>3</sub>)  $\delta$  145.76, 144.98, 139.09, 136.98, 134.57, 132.69, 131.16, 131.12, 130.64, 129.89, 129.35, 124.10, 122.08, 121.65, 113.22, 63.96, 53.66, 41.96, 40.47. HRMS (ESI)  $m/z$  (M+H)<sup>+</sup> calculated for C<sub>25</sub>H<sub>23</sub>ClNO: 388.1463, observed: 388.1465.

**((2S,3S,4S)-4-(4-bromophenyl)-2-phenyl-2,3,4,9-tetrahydro-1H-carbazol-3-yl)methanol (4ha)**

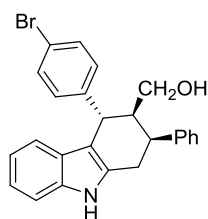

**4ha** (37 mg) was obtained as a white solid in 57% yield after flash chromatography and the enantiomeric excess was determined to be 94% by HPLC analysis on Chiralpak OD-H column (15% 2-propanol/n-hexane, 1 mL/min), UV 254 nm,  $t$  (major) = 14.08 min,  $t$  (minor) = 26.22 min;  $[\alpha]_D^{20} = +23.0$  (c 0.018, CHCl<sub>3</sub>); <sup>1</sup>H NMR (600 MHz, CDCl<sub>3</sub>)  $\delta$  7.94 (s, 1H), 7.40 (d,  $J$  = 8.3 Hz, 2H), 7.34 (d,  $J$  = 8.1 Hz, 1H), 7.27–7.25 (m, 2H), 7.22–7.20 (m, 1H), 7.13–7.12 (m, 3H), 7.09 (d,  $J$  = 8.3 Hz, 2H), 6.93 (t,  $J$  = 7.4 Hz, 1H), 6.86–6.84 (m, 1H), 4.17 (brs, 1H), 3.62 – 3.53 (m, 2H), 3.50–3.48 (m, 1H), 3.22 (dd,  $J$  = 16.5, 5.7 Hz, 1H), 3.11 (dd,  $J$  = 16.4, 7.4 Hz, 1H), 2.39 – 2.34 (m, 1H).

$^{13}\text{C}$  NMR (151 MHz,  $\text{CDCl}_3$ )  $\delta$  146.29, 144.94, 139.08, 136.97, 134.06, 133.10, 131.15, 130.62, 129.86, 129.34, 124.11, 122.68, 122.09, 121.64, 113.20, 63.94, 53.62, 42.01, 40.46. HRMS (ESI)  $m/z$  ( $\text{M}+\text{H}$ ) $^+$  calculated for  $\text{C}_{25}\text{H}_{23}\text{BrNO}$ : 432.0958, observed: 432.0960.

**((2S,3S,4S)-2-phenyl-4-(4-(trifluoromethyl)phenyl)-2,3,4,9-tetrahydro-1H-carbazol-3-yl)methanol (4ia)**

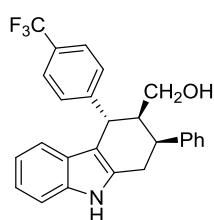

**4ia** (35 mg) was obtained as a white semisolid in 56% yield after flash chromatography and the enantiomeric excess was determined to be 99% by HPLC analysis on Chiralpak OD-H column (15% 2-propanol/n-hexane, 1 mL/min), UV 254 nm,  $t$  (major) = 10.63 min,  $t$  (minor) = 20.92 min;  $[\alpha]_{\text{D}}^{20} = -11.5$  (c 0.104,  $\text{CHCl}_3$ );  $^1\text{H}$  NMR (600 MHz,  $\text{CDCl}_3$ )  $\delta$  7.98 (s, 1H), 7.54 (d,  $J = 8.1$  Hz, 2H), 7.35 (dd,  $J = 13.9, 8.1$  Hz, 3H), 7.31 – 7.21 (m, 3H), 7.14 (m, 3H), 6.94 (t,  $J = 7.5$  Hz, 1H), 6.84–6.81 (m, 1H), 4.31 (brs, 1H), 3.63 – 3.48 (m, 3H), 3.24 (dd,  $J = 16.4, 5.7$  Hz, 1H), 3.13 (dd,  $J = 16.4, 7.6$  Hz, 1H), 2.41–2.39 (m, 1H).  $^{13}\text{C}$  NMR (151 MHz,  $\text{CDCl}_3$ )  $\delta$  151.50, 144.80, 139.07, 137.10, 131.65, 131.20, 130.60, 129.77, 129.42, 127.95 (q,  $J = 7.5, 3.8$  Hz), 126.11, 124.20, 122.15, 121.51, 113.28, 63.76, 53.60, 42.34, 40.40, 32.38. HRMS (ESI)  $m/z$  ( $\text{M}+\text{H}$ ) $^+$  calculated for  $\text{C}_{26}\text{H}_{23}\text{F}_3\text{NO}$ : 422.1726, observed: 422.1723.

**4-((2S,3S,4S)-3-(hydroxymethyl)-2-phenyl-2,3,4,9-tetrahydro-1H-carbazol-4-yl)benzonitrile (4ja)**

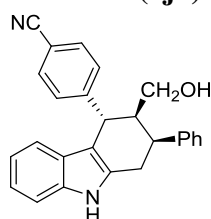

**4ja** (34 mg) was obtained as a white semisolid in 60% yield after flash chromatography and the enantiomeric excess was determined to be 99% by HPLC analysis on Chiralpak OD-H column (15% 2-propanol/n-hexane, 1 mL/min), UV 254 nm,  $t$  (major) = 18.15 min,  $t$  (minor) = 37.80 min;  $[\alpha]_{\text{D}}^{20} = -28.3$  (c 0.06,  $\text{CHCl}_3$ );  $^1\text{H}$  NMR (400 MHz,  $\text{CDCl}_3$ )  $\delta$  7.98 (s, 1H), 7.49 (d,  $J = 8.1$  Hz, 2H), 7.27–7.24 (m, 2H), 7.22 – 7.13 (m, 4H), 7.06–7.00 (m, 3H), 6.86 (t,  $J = 7.4$  Hz, 1H), 6.73 (d,  $J = 7.8$  Hz, 1H), 4.25 (brs, 1H), 3.45 (d,  $J = 6.3$  Hz, 3H), 3.15 (dd,  $J = 16.5, 5.7$  Hz, 1H), 3.05 (dd,  $J = 16.4, 7.9$  Hz, 1H), 2.30–2.28 (m, 1H).  $^{13}\text{C}$  NMR (151 MHz,  $\text{CDCl}_3$ )  $\delta$  153.23, 144.62,

139.09, 137.19, 134.86, 132.15, 131.23, 130.50, 129.64, 129.47, 124.33, 122.25, 121.73, 121.30, 113.34, 112.81, 63.60, 53.60, 42.64, 40.47, 34.26, 32.31. HRMS (ESI)  $m/z$  (M+H)<sup>+</sup> calculated for C<sub>26</sub>H<sub>23</sub>N<sub>2</sub>O: 379.1805, observed: 379.1807.

**methy14-((2S,3S,4S)-3-(hydroxymethyl)-2-phenyl-2,3,4,9-tetrahydro-1H-carbazol-4-yl)benzoate (4ka)**

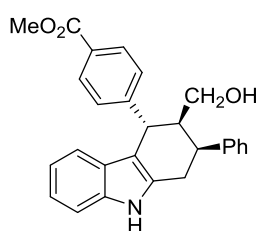

**4ka** (34 mg) was obtained as a white semisolid in 56% yield after flash chromatography and the enantiomeric excess was determined to be 98% by HPLC analysis on Chiralpak OD-H column (15% 2-propanol/n-hexane, 1 mL/min), UV 254 nm,  $t$  (major) = 18.83 min,  $t$  (minor) = 31.19 min;  $[\alpha]_D^{20} = +15.2$  (c 0.021, CHCl<sub>3</sub>); <sup>1</sup>H NMR (600 MHz, CDCl<sub>3</sub>)  $\delta$  7.97 (s, 1H), 7.87 (d,  $J$  = 8.2 Hz, 2H), 7.27 (d,  $J$  = 8.1 Hz, 1H), 7.20 (d,  $J$  = 8.1 Hz, 2H), 7.18 – 7.11 (m, 3H), 7.07 – 6.99 (m, 3H), 6.85 – 6.77 (m, 1H), 6.72-6.70 (m, 1H), 4.16 (brs, 1H), 3.82 (s, 3H), 3.51-3.49 (m, 1H), 3.45-3.42 (m, 1H), 3.42 – 3.38 (m, 1H), 3.14 (dd,  $J$  = 16.2, 4.9 Hz, 1H), 3.02 (dd,  $J$  = 16.4, 7.3 Hz, 1H), 2.36 – 2.26 (m, 1H). <sup>13</sup>C NMR (151 MHz, CDCl<sub>3</sub>)  $\delta$  169.94, 152.96, 144.86, 139.05, 137.08, 132.38, 131.46, 131.16, 130.88, 130.67, 129.81, 129.37, 124.09, 122.06, 121.56, 113.27, 63.84, 54.75, 53.48, 42.56, 40.45. HRMS (ESI)  $m/z$  (M+H)<sup>+</sup> calculated for C<sub>27</sub>H<sub>26</sub>NO<sub>3</sub>: 412.1907, observed: 412.1904.

**((2S,3S,4S)-4-(4-methoxyphenyl)-2-phenyl-2,3,4,9-tetrahydro-1H-carbazol-3-yl) methanol (4la)**

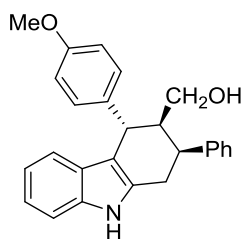

**4la** (30 mg) was obtained as a white semisolid in 53% yield after flash chromatography and the enantiomeric excess was determined to be more than 99% by HPLC analysis on Chiralpak OD-H column (15% 2-propanol/n-hexane, 1 mL/min), UV 254 nm,  $t$  (major) = 19.73 min,  $t$  (minor) = 26.52 min;  $[\alpha]_D^{20} = +2.9$  (c 0.138, CHCl<sub>3</sub>); <sup>1</sup>H NMR (600 MHz, CDCl<sub>3</sub>)  $\delta$  7.93 (s, 1H), 7.33 (d,  $J$  = 8.1 Hz, 1H), 7.28 – 7.20 (m, 3H), 7.16 (d,  $J$  = 7.0 Hz, 2H), 7.14 – 7.08 (m, 3H), 6.90 (t,  $J$  = 7.4 Hz, 1H), 6.86-6.84 (m, 1H), 6.82 (d,  $J$  = 8.7 Hz, 2H), 4.08 (brs, 1H), 3.79 (s, 3H), 3.65-3.62 (m, 1H), 3.57 (dd,  $J$  = 10.7, 6.6 Hz, 1H), 3.48-3.35 (m, 1H),

3.26 (dd,  $J = 16.3, 5.7$  Hz, 1H), 3.10 (dd,  $J = 16.4, 6.7$  Hz, 1H), 2.39-2.37 (m, 1H).  $^{13}\text{C}$  NMR (101 MHz,  $\text{CDCl}_3$ )  $\delta$  158.03, 142.60, 136.43, 134.12, 129.61, 128.45, 128.11, 127.46, 126.60, 121.25, 119.28, 119.27, 113.71, 110.47, 61.81, 55.23, 50.96, 39.13, 38.01. HRMS (ESI)  $m/z$  ( $\text{M}+\text{H}$ ) $^+$  calculated for  $\text{C}_{26}\text{H}_{26}\text{NO}_2$ : 384.1958, observed: 384.1960.

**((2S,3S,4S)-4-(naphthalen-1-yl)-2-phenyl-2,3,4,9-tetrahydro-1H-carbazol-3-yl)methanol (4ma)**

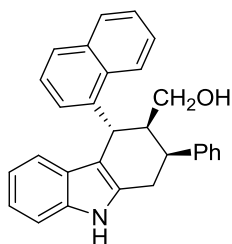

**4ma** (23 mg) was obtained as a white solid in 38% yield after flash chromatography and the enantiomeric excess was determined to be 98% by HPLC analysis on Chiralpak OD-H column (15% 2-propanol/n-hexane, 1 mL/min), UV 254 nm,  $t$  (major) = 31.72 min,  $t$  (minor) = 25.21 min;  $[\alpha]_{\text{D}}^{20} = -33.0$  (c 0.1,  $\text{CHCl}_3$ );  $^1\text{H}$  NMR (600 MHz,  $\text{CDCl}_3$ )  $\delta$  8.20 (d,  $J = 7.7$  Hz, 1H), 7.93-7.90 (m, 2H), 7.81 – 7.70 (m, 1H), 7.57 – 7.47 (m, 2H), 7.37 – 7.29 (m, 5H), 7.27-7.24 (m, 3H), 7.08 (t,  $J = 7.5$  Hz, 1H), 6.81 (t,  $J = 7.5$  Hz, 1H), 6.74 (d,  $J = 7.9$  Hz, 1H), 5.23 (d,  $J = 5.1$  Hz, 1H), 3.70-3.68 (m, 1H), 3.43 (q,  $J = 11.5, 6.0$  Hz, 1H), 3.33 (dd,  $J = 16.9, 5.8$  Hz, 1H), 3.20 (dd,  $J = 11.4, 6.8$  Hz, 1H), 3.15 (dd,  $J = 16.9, 6.1$  Hz, 1H), 2.85 – 2.79 (m, 1H).  $^{13}\text{C}$  NMR (151 MHz,  $\text{CDCl}_3$ )  $\delta$  146.89, 140.07, 138.99, 136.72, 134.71, 131.77, 131.33, 130.20, 130.12, 129.81, 129.67, 129.24, 128.84, 128.12, 127.82, 125.73, 123.90, 122.35, 121.70, 114.47, 113.09, 65.74, 49.89, 41.76, 36.63. HRMS (ESI)  $m/z$  ( $\text{M}+\text{H}$ ) $^+$  calculated for  $\text{C}_{29}\text{H}_{26}\text{NO}$ : 404.2009, observed: 404.2006.

**((2S,3S,4R)-2-phenyl-4-(thiophen-2-yl)-2,3,4,9-tetrahydro-1H-carbazol-3-yl)methanol (4na)**

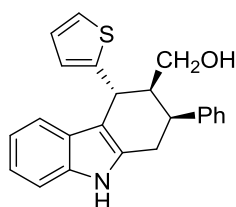

**4na** (27 mg) was obtained as a white semisolid in 51% yield after flash chromatography and the enantiomeric excess was determined to be 99% by HPLC analysis on Chiralpak OD-H column (15% 2-propanol/n-hexane, 1 mL/min), UV 254 nm,  $t$  (major) = 15.37 min,  $t$  (minor) = 27.38 min;  $[\alpha]_{\text{D}}^{20} = -70$  (c 0.066,  $\text{CHCl}_3$ );  $^1\text{H}$  NMR (400 MHz,  $\text{CDCl}_3$ )  $\delta$  7.90 (s, 1H), 7.36 – 7.06 (m, 9H), 6.99 (t,  $J = 7.4$  Hz, 1H), 6.95 – 6.88 (m, 1H), 6.84-6.80 (m, 1H), 4.57 (d,  $J = 3.5$  Hz, 1H), 3.69-3.66 (m, 1H), 3.63 –

3.47 (m, 2H), 3.20 – 3.01 (m, 2H), 2.53 (s, 1H).  $^{13}\text{C}$  NMR (151 MHz,  $\text{CDCl}_3$ )  $\delta$  152.03, 145.03, 138.89, 136.31, 131.16, 130.57, 130.09, 129.31, 129.16, 127.97, 126.36, 124.12, 122.16, 121.55, 113.23, 63.78, 54.40, 40.54, 38.11. HRMS (ESI)  $m/z$  ( $\text{M}+\text{H}$ ) $^+$  calculated for  $\text{C}_{23}\text{H}_{22}\text{NOS}$ : 360.1428, observed: 360.1422.

**((2S,3S,4S)-7-methyl-2,4-diphenyl-2,3,4,9-tetrahydro-1H-carbazol-3-yl)methanol (4oa)**

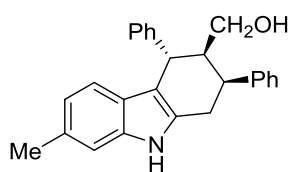

**4oa** (26 mg) was obtained as a white semisolid in 48% yield after flash chromatography and the enantiomeric excess was determined to be 94% by HPLC analysis on Chiralpak AD-H column (20% 2-propanol/n-hexane, 1 mL/min), UV 254 nm,  $t$  (major) = 16.03 min,  $t$  (minor) = 27.46 min;  $[\alpha]_{\text{D}}^{20} = +8.3$  (c 0.036,  $\text{CHCl}_3$ );  $^1\text{H}$  NMR (600 MHz, DMSO)  $\delta$  10.74 (s, 1H), 7.24-7.22 (m, 4H), 7.16-7.15 (m, 2H), 7.11 (d,  $J = 7.3$  Hz, 2H), 7.09 – 7.05 (m, 3H), 6.56 (s, 2H), 4.53 (t,  $J = 5.0$  Hz, 1H), 3.44 (d, 1H), 3.34 (s, 3H), 3.23-3.22 (m, 2H), 3.11 – 3.00 (m, 2H), 2.20 (d,  $J = 3.2$  Hz, 1H).  $^{13}\text{C}$  NMR (151 MHz, DMSO)  $\delta$  148.73, 146.05, 140.01, 137.34, 132.14, 131.40, 131.23, 131.15, 130.91, 129.21, 128.92, 128.09, 122.78, 120.77, 113.85, 82.29, 61.58, 39.89, 24.48. HRMS (ESI)  $m/z$  ( $\text{M}+\text{H}$ ) $^+$  calculated for  $\text{C}_{26}\text{H}_{26}\text{NO}$ : 368.2011, observed: 368.2013.

**((2S,3S,4S)-7-fluoro-2,4-diphenyl-2,3,4,9-tetrahydro-1H-carbazol-3-yl)methanol (4pa)**

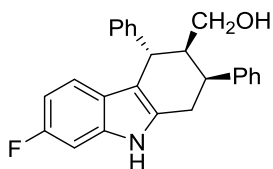

**4pa** (30 mg) was obtained as a white semisolid in 54% yield after flash chromatography and the enantiomeric excess was determined to be more than 99% by HPLC analysis on Chiralpak AD-H column (20% 2-propanol/n-hexane, 1 mL/min), UV 254 nm,  $t$  (major) = 10.46 min,  $t$  (minor) = 14.20 min;  $[\alpha]_{\text{D}}^{20} = +8.0$  (c 0.05,  $\text{CHCl}_3$ );  $^1\text{H}$  NMR (600 MHz,  $\text{CDCl}_3$ )  $\delta$  7.94 (s, 1H), 7.31 – 7.21 (m, 6H), 7.19 (d,  $J = 7.4$  Hz, 2H), 7.14 (d,  $J = 7.3$  Hz, 2H), 7.01-7.00 (m, 1H), 6.69 -6.67(m, 1H), 6.65-6.63 (m, 1H), 4.11 (brs, 1H), 3.63-3.61 (m, 1H), 3.56-3.54 (m, 1H), 3.49-3.47 (m, 1H), 3.24 (dd,  $J = 16.2, 5.3$  Hz, 1H), 3.08 (dd,  $J = 16.4, 6.7$  Hz, 1H), 2.45 – 2.37 (m,

1H). <sup>13</sup>C NMR (151 MHz, CDCl<sub>3</sub>) δ 162.92, 161.35, 146.86, 145.04, 137.06, 131.32, 131.08 (d, *J* = 12.2 Hz), 130.70, 129.31, 129.07, 126.58, 122.32 (d, *J* = 9.9 Hz), 110.40, 110.24, 99.86, 99.68, 64.26, 53.43, 42.50, 40.52. HRMS (ESI) *m/z* (M+H)<sup>+</sup> calculated for C<sub>25</sub>H<sub>23</sub>FNO: 372.1758, observed: 372.1760.

**methyl(2S,3S,4S)-3-(hydroxymethyl)-2,4-diphenyl-2,3,4,9-tetrahydro-1H-carbazole-7-carboxylate (4qa)**

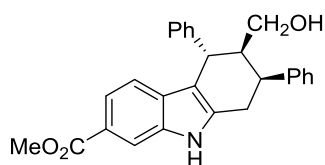

**4qa** (37 mg) was obtained as a white solid in 61% yield after flash chromatography and the enantiomeric excess was determined to be 96% by HPLC analysis on Chiralpak AD-H column (20% 2-propanol/n-hexane, 1 mL/min), UV 254 nm, *t* (major) = 13.58 min, *t* (minor) = 24.55 min; [α]<sub>D</sub><sup>20</sup> = -23.6 (c 0.072, CHCl<sub>3</sub>); <sup>1</sup>H NMR (400 MHz, CDCl<sub>3</sub>) δ 8.37 (s, 1H), 8.10 (s, 1H), 7.58 (d, *J* = 8.4 Hz, 1H), 7.31 – 7.21 (m, 6H), 7.17-7.16 (m, 2H), 7.15 – 7.09 (m, 2H), 6.81 (d, *J* = 8.3 Hz, 1H), 4.15 (d, *J* = 5.1 Hz, 1H), 3.90 (s, 3H), 3.65 (d, *J* = 3.0 Hz, 1H), 3.52-3.50 (m, 2H), 3.28 (dd, *J* = 16.7, 5.6 Hz, 1H), 3.13 (dd, *J* = 16.7, 6.8 Hz, 1H), 2.48 – 2.37 (m, 1H). <sup>13</sup>C NMR (101 MHz, CDCl<sub>3</sub>) δ 167.33, 142.98, 141.10, 137.15, 134.70, 130.07, 127.60, 127.46, 127.40, 126.98, 125.68, 125.44, 121.72, 119.49, 117.57, 111.72, 110.86, 60.42, 50.90, 49.70, 38.69, 36.66. HRMS (ESI) *m/z* (M+H)<sup>+</sup> calculated for C<sub>27</sub>H<sub>26</sub>NO<sub>3</sub>: 412.1907, observed: 412.1909.

**((2S,3S,4S)-6-methyl-2,4-diphenyl-2,3,4,9-tetrahydro-1H-carbazol-3-yl)methanol (4ra)**

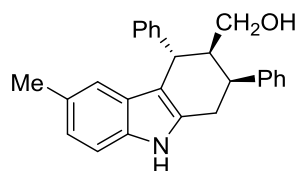

**4ra** (31 mg) was obtained as a white solid in 57% yield after flash chromatography and the enantiomeric excess was determined to be 99% by HPLC analysis on Chiralpak OD-H column (15% 2-propanol/n-hexane, 1 mL/min), UV 254 nm, *t* (major) = 12.89 min, *t* (minor) = 10.56 min; [α]<sub>D</sub><sup>20</sup> = -12.3 (c 0.106, CHCl<sub>3</sub>); <sup>1</sup>H NMR (600 MHz, CDCl<sub>3</sub>) δ 7.82 (s, 1H), 7.31-7.30 (m, 2H), 7.27-7.25 (m, 3H), 7.23-7.22 (m, 4H), 7.15 (d, *J* = 7.3 Hz, 2H), 6.95 (d, *J* = 8.0 Hz, 1H), 6.69 (s, 1H), 4.20 (brs, 1H), 3.60-3.58 (m, 1H), 3.56-3.54 (m, 1H), 3.54 – 3.49 (m, 1H), 3.20 (dd, *J*

= 15.8, 4.7 Hz, 1H), 3.09 (dd,  $J = 16.3, 7.6$  Hz, 1H), 2.43 (m, 1H), 2.28 (s, 3H).  $^{13}\text{C}$  NMR (151 MHz,  $\text{CDCl}_3$ )  $\delta$  147.28, 145.29, 137.41, 137.04, 131.35, 131.14, 131.08, 130.97, 130.66, 130.40, 129.20, 128.86, 125.45, 121.53, 112.81, 64.26, 53.85, 42.63, 40.40, 24.07. HRMS (ESI)  $m/z$  ( $\text{M}+\text{H}$ ) $^+$  calculated for  $\text{C}_{26}\text{H}_{26}\text{NO}$ : 368.2011, observed: 368.2014.

**((2S,3S,4S)-6-fluoro-2,4-diphenyl-2,3,4,9-tetrahydro-1H-carbazol-3-yl)methanol (4sa)**

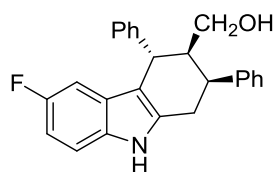

**4sa** (29 mg) was obtained as a white solid in 53% yield after flash chromatography and the enantiomeric excess was determined to be 99% by HPLC analysis on Chiralpak AD-H column (15% 2-propanol/n-hexane, 1 mL/min), UV 254 nm,  $t$  (major) = 10.90 min,  $t$  (minor) = 21.44 min;  $[\alpha]_{\text{D}}^{20} = -60.0$  (c 0.02,  $\text{CHCl}_3$ );  $^1\text{H}$  NMR (600 MHz,  $\text{CDCl}_3$ )  $\delta$  7.97 (s, 1H), 7.30-7.28 (t,  $J = 7.4$  Hz, 2H), 7.27 – 7.22 (m, 5H), 7.18 (d,  $J = 7.5$  Hz, 2H), 7.12 (d,  $J = 7.4$  Hz, 2H), 7.05 (m, 1H), 6.80 (s, 1H), 4.12 (brs, 1H), 3.63-3.62 (m, 1H), 3.57-3.54 (m, 1H), 3.52 – 3.47 (m, 1H), 3.23 (dd,  $J = 16.4, 5.3$  Hz, 1H), 3.10 (dd,  $J = 16.5, 7.1$  Hz, 1H), 2.41 (m, 1H).  $^{13}\text{C}$  NMR (151 MHz,  $\text{CDCl}_3$ )  $\delta$  146.59, 144.91, 138.44, 137.42, 131.24, 131.22, 131.13, 131.12, 130.62, 129.33, 129.17, 127.64, 124.17, 121.25, 114.04, 64.16, 53.55, 42.44, 40.36. HRMS (ESI)  $m/z$  ( $\text{M}+\text{H}$ ) $^+$  calculated for  $\text{C}_{25}\text{H}_{23}\text{FNO}$ : 372.1758, observed: 372.1757.

**((2S,3S,4S)-6-chloro-2,4-diphenyl-2,3,4,9-tetrahydro-1H-carbazol-3-yl)methanol (4ta)**

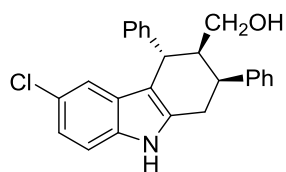

**4ta** (37 mg) was obtained as a white solid in 64% yield after flash chromatography and the enantiomeric excess was determined to be 97% by HPLC analysis on Chiralpak AD-H column (15% 2-propanol/n-hexane, 1 mL/min), UV 254 nm,  $t$  (major) = 11.85 min,  $t$  (minor) = 17.84 min;  $[\alpha]_{\text{D}}^{20} = +4.05$  (c 0.074,  $\text{CHCl}_3$ );  $^1\text{H}$  NMR (600 MHz,  $\text{CDCl}_3$ )  $\delta$  7.94 (s, 1H), 7.30-7.28 (m, 2H), 7.27 – 7.21 (m, 5H), 7.20-7.18 (m, 2H), 7.14 (d,  $J = 7.1$  Hz, 2H), 6.84-6.83 (m, 1H), 6.45 (d,  $J = 9.3$  Hz, 1H), 4.08 (brs, 1H), 3.66-3.64 (m, 1H), 3.56-3.55 (m, 1H), 3.50-3.48 (m, 1H), 3.25 (dd,  $J = 16.5, 5.5$  Hz, 1H), 3.09 (dd,



$J = 16.5, 6.6$  Hz, 1H), 2.46 – 2.38 (m, 1H).  $^{13}\text{C}$  NMR (151 MHz,  $\text{CDCl}_3$ )  $\delta$  160.96, 159.41, 146.56, 144.97, 138.81, 135.51, 131.28, 131.13, 131.11, 130.70, 129.33, 129.17, 113.55, 113.49, 112.00, 111.83, 107.03, 106.87, 64.27, 53.40, 42.53, 40.54. HRMS (ESI)  $m/z$  ( $\text{M}+\text{H}$ ) $^+$  calculated for  $\text{C}_{25}\text{H}_{23}\text{ClNO}$ : 388.1463, observed: 388.1462.

**((2S,3S,4S)-6-methoxy-2,4-diphenyl-2,3,4,9-tetrahydro-1H-carbazol-3-yl)methanol (4ua)**

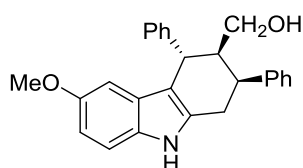

**4ua** (37 mg) was obtained as a white semisolid in 65% yield after flash chromatography and the enantiomeric excess was determined to be more than 99% by HPLC analysis on Chiralpak AD-H column (20% 2-propanol/n-hexane, 1 mL/min), UV 254 nm,  $t$  (major) = 14.63 min,  $t$  (minor) = 21.21 min;  $[\alpha]_{\text{D}}^{20} = -15.0$  (c 0.02,  $\text{CHCl}_3$ );  $^1\text{H}$  NMR (400 MHz,  $\text{CDCl}_3$ )  $\delta$  7.83 (s, 1H), 7.30 – 7.25 (m, 3H), 7.25 – 7.19 (m, 6H), 7.18 – 7.13 (m, 2H), 6.75 (dd,  $J = 8.7, 2.4$  Hz, 1H), 6.25 (s, 1H), 4.08 (d,  $J = 5.8$  Hz, 1H), 3.68 – 3.60 (m, 1H), 3.57 (s, 3H), 3.56–3.54 (m, 1H), 3.49 (dd,  $J = 10.6, 6.9$  Hz, 1H), 3.25 (dd,  $J = 16.5, 5.9$  Hz, 1H), 3.08 (dd,  $J = 16.5, 6.7$  Hz, 1H), 2.44 (m, 1H).  $^{13}\text{C}$  NMR (101 MHz,  $\text{CDCl}_3$ )  $\delta$  153.65, 144.26, 142.52, 135.05, 131.45, 128.79, 128.46, 128.37, 128.13, 127.92, 126.63, 126.32, 111.04, 110.80, 101.52, 61.72, 55.63, 50.75, 39.97, 37.94. HRMS (ESI)  $m/z$  ( $\text{M}+\text{H}$ ) $^+$  calculated for  $\text{C}_{26}\text{H}_{26}\text{NO}_2$ : 384.1958, observed: 384.1956.

**((2S,3S,4S)-4-phenyl-2-(p-tolyl)-2,3,4,9-tetrahydro-1H-carbazol-3-yl)methanol (4ab)**

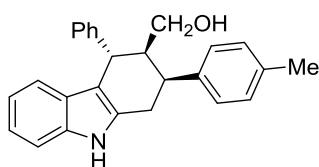

**4ab** (30 mg) was obtained as a white solid in 54% yield after flash chromatography and the enantiomeric excess was determined to be more than 99% by HPLC analysis on Chiralpak OD-H column (15% 2-propanol/n-hexane, 1 mL/min), UV 254 nm,  $t$  (major) = 10.03 min,  $t$  (minor) = 21.42 min;  $[\alpha]_{\text{D}}^{20} = +28.0$  (c 0.082,  $\text{CHCl}_3$ );  $^1\text{H}$  NMR (600 MHz,  $\text{CDCl}_3$ )  $\delta$  7.91 (s, 1H), 7.33 (d,  $J = 8.1$  Hz, 1H), 7.31 – 7.25 (m, 3H), 7.23–7.22(m, 3H), 7.10–7.08 (m, 1H), 7.05–7.02 (m, 3H), 6.89 (t,  $J = 7.4$  Hz, 1H), 6.82–6.80 (m, 1H), 4.14 (brs, 1H), 3.62–3.60 (m, 1H), 3.57–3.54 (m,

1H), 3.52-3.50 (m, 1H), 3.26 (dd,  $J = 16.4, 5.5$  Hz, 1H), 3.09 (dd,  $J = 16.4, 6.7$  Hz, 1H), 2.43 – 2.38 (m, 1H), 2.31 (s, 3H).  $^{13}\text{C}$  NMR (151 MHz,  $\text{CDCl}_3$ )  $\delta$  147.13, 142.09, 139.07, 138.80, 136.92, 131.78, 131.38, 130.96, 130.60, 130.10, 128.91, 123.87, 121.89, 121.85, 113.08, 64.50, 53.52, 42.65, 40.33, 23.64. HRMS (ESI)  $m/z$  ( $\text{M}+\text{H}$ ) $^+$  calculated for  $\text{C}_{26}\text{H}_{26}\text{NO}$ : 368.2009, observed: 368.2010.

**((2S,3S,4S)-2-(4-fluorophenyl)-4-phenyl-2,3,4,9-tetrahydro-1H-carbazol-3-yl)methanol (4ac)**

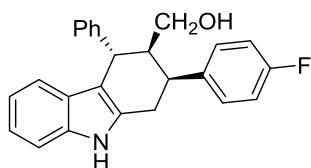

**4ac** (26 mg) was obtained as a white semisolid in 47% yield after flash chromatography and the enantiomeric excess was determined to be 98% by HPLC analysis on Chiralpak

OD-H column (15% 2-propanol/n-hexane, 1 mL/min), UV 254 nm,  $t$  (major) = 10.73 min,  $t$  (minor) = 21.47 min;  $[\alpha]_{\text{D}}^{20} = +32.5$  (c 0.04,  $\text{CHCl}_3$ );  $^1\text{H}$  NMR (600 MHz,  $\text{CDCl}_3$ )  $\delta$  7.93 (s, 1H), 7.33 (d,  $J = 8.1$  Hz, 1H), 7.28-7.25 (m, 3H), 7.24 (d,  $J = 6.9$  Hz, 1H), 7.20 (d,  $J = 7.6$  Hz, 2H), 7.11 (m, 3H), 6.93 (t,  $J = 8.4$  Hz, 2H), 6.88 (t,  $J = 7.5$  Hz, 1H), 6.78 (d,  $J = 7.4$  Hz, 1H), 4.04 (brs, 1H), 3.66-3.64 (m, 1H), 3.56-3.53 (m,  $J = 10.5, 6.4$  Hz, 1H), 3.46 – 3.37 (m, 1H), 3.29 (dd,  $J = 16.2, 5.2$  Hz, 1H), 3.07 (dd,  $J = 16.4, 6.0$  Hz, 1H), 2.40-2.38 (m, 1H).  $^{13}\text{C}$  NMR (101 MHz,  $\text{CDCl}_3$ )  $\delta$  162.83, 160.40, 144.22, 138.02 (d,  $J = 3.3$  Hz), 136.44, 133.95, 129.63 (d,  $J = 7.6$  Hz), 128.75, 128.41, 127.31, 126.43, 121.36, 119.30 (d,  $J = 8.5$  Hz), 115.26, 115.05, 110.53, 61.60, 50.61, 39.97, 37.24, 29.74. HRMS (ESI)  $m/z$  ( $\text{M}+\text{H}$ ) $^+$  calculated for  $\text{C}_{25}\text{H}_{23}\text{FNO}$ : 372.1763, observed: 372.1764.

**((2S,3S,4S)-2-(4-chlorophenyl)-4-phenyl-2,3,4,9-tetrahydro-1H-carbazol-3-yl)methanol (4ad)**

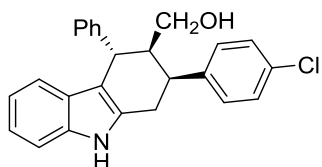

**4ad** (27 mg) was obtained as a white semisolid in 48% yield after flash chromatography and the enantiomeric excess was determined to be 99% by HPLC analysis on Chiralpak OD-H column (15% 2-propanol/n-hexane, 1

mL/min), UV 254 nm,  $t$  (major) = 12.73 min,  $t$  (minor) = 24.99 min;  $[\alpha]_{\text{D}}^{20} = +19.3$  (c 0.088,  $\text{CHCl}_3$ );  $^1\text{H}$  NMR (400 MHz,  $\text{CDCl}_3$ )  $\delta$  7.94 (s, 1H), 7.34 (d,  $J = 8.1$  Hz, 1H),

7.29 – 7.25 (m, 3H), 7.20-7.18 (m, 4H), 7.10 (t,  $J = 8.2$  Hz, 3H), 6.88 (t,  $J = 7.5$  Hz, 1H), 6.77 (d,  $J = 7.7$  Hz, 1H), 4.01 (brs, 1H), 3.67-3.65 (m, 1H), 3.57-3.54 (m, 1H), 3.46 – 3.37 (m, 1H), 3.30 (dd,  $J = 16.6, 5.7$  Hz, 1H), 3.06 (dd,  $J = 16.4, 5.9$  Hz, 1H), 2.41 (m, 1H).  $^{13}\text{C}$  NMR (101 MHz,  $\text{CDCl}_3$ )  $\delta$  143.08, 139.79, 135.37, 132.77, 131.24, 128.53, 127.66, 127.42, 127.36, 126.21, 125.39, 120.31, 118.28, 118.19, 109.48, 60.46, 49.44, 38.89, 36.28. HRMS (ESI)  $m/z$  ( $\text{M}+\text{H}$ ) $^+$  calculated for  $\text{C}_{25}\text{H}_{23}\text{ClNO}$ : 388.1465, observed: 388.1467.

**((2S,3S,4S)-2-(4-bromophenyl)-4-phenyl-2,3,4,9-tetrahydro-1H-carbazol-3-yl)methanol (4ae)**

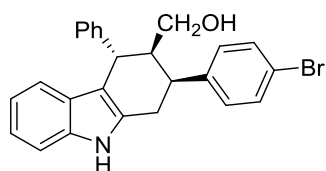

**4ae** (26 mg) was obtained as a white semisolid in 41% yield after flash chromatography and the enantiomeric excess was determined to be more than 99% by HPLC analysis on Chiralpak OD-H column (15% 2-propanol/n-hexane, 1 mL/min), UV 254 nm,  $t$  (major) = 11.54 min,  $t$  (minor) = 26.02 min;  $[\alpha]_{\text{D}}^{20} = +30.9$  (c 0.084,  $\text{CHCl}_3$ );  $^1\text{H}$  NMR (400 MHz,  $\text{CDCl}_3$ )  $\delta$  7.85 (s, 1H), 7.28-7.24 (m, 2H), 7.21 – 7.14 (m, 4H), 7.12 – 7.09 (m, 2H), 7.06 – 6.99 (m, 1H), 6.95 (d,  $J = 8.4$  Hz, 2H), 6.79 (t,  $J = 7.4$  Hz, 1H), 6.67 (d,  $J = 7.7$  Hz, 1H), 3.91 (brs, 1H), 3.57-3.55 (m, 1H), 3.47-3.45 (m, 1H), 3.33-3.31 (m, 1H), 3.21 (dd,  $J = 16.4, 5.8$  Hz, 1H), 2.97 (dd,  $J = 16.4, 5.8$  Hz, 1H), 2.32 (m, 1H).  $^{13}\text{C}$  NMR (75 MHz,  $\text{CDCl}_3$ )  $\delta$  144.10, 141.39, 136.45, 133.74, 131.44, 129.97, 128.71, 128.41, 127.28, 126.44, 121.39, 120.41, 119.35, 119.26, 110.49, 61.57, 50.45, 39.98, 37.46. HRMS (ESI)  $m/z$  ( $\text{M}+\text{H}$ ) $^+$  calculated for  $\text{C}_{25}\text{H}_{23}\text{BrNO}$ : 432.0958, observed: 432.0954.

**((2S,3S,4S)-2-(2-bromophenyl)-4-phenyl-2,3,4,9-tetrahydro-1H-carbazol-3-yl)methanol (4af)**

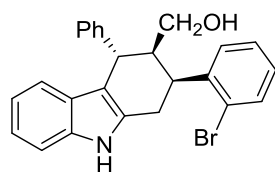

**4af** (29 mg) was obtained as a white solid in 45% yield after flash chromatography and the enantiomeric excess was determined to be more than 99% by HPLC analysis on Chiralpak OD-H column (15% 2-propanol/n-hexane, 1 mL/min), UV 254 nm,  $t$  (major) = 19.50 min,  $t$  (minor) = 32.71 min;  $[\alpha]_{\text{D}}^{20} = -47.3$  (c 0.074,  $\text{CHCl}_3$ );  $^1\text{H}$  NMR

(600 MHz, CDCl<sub>3</sub>)  $\delta$  7.95 (s, 1H), 7.50 (d,  $J$  = 7.9 Hz, 1H), 7.35 (d,  $J$  = 8.1 Hz, 1H), 7.28 – 7.24 (m, 4H), 7.22-7.20(m, 3H), 7.17 – 7.10 (m, 2H), 7.08-7.06 (m, 1H), 6.97 (t,  $J$  = 7.5 Hz, 1H), 4.55 (brs, 1H), 3.93 – 3.86 (m, 1H), 3.67 – 3.59 (m, 2H), 3.20-3.17 (m, 1H), 2.96 (dd,  $J$  = 16.0, 5.1 Hz, 1H), 2.44-2.41 (m, 1H). <sup>13</sup>C NMR (151 MHz, CDCl<sub>3</sub>)  $\delta$  147.04, 144.08, 139.13, 136.73, 136.26, 131.54, 131.14, 130.74, 130.26, 129.92, 128.77, 127.90, 124.18, 122.08, 121.71, 113.17, 112.44, 63.91, 51.55, 42.67, 39.57. HRMS (ESI)  $m/z$  (M+H)<sup>+</sup> calculated for C<sub>25</sub>H<sub>23</sub>BrNO: 432.0958, observed: 432.0955.

**((2S,3S,4S)-2-(2-methoxyphenyl)-4-phenyl-2,3,4,9-tetrahydro-1H-carbazol-3-yl) methanol (4ag)**

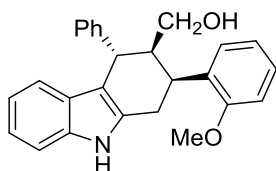

**4ag** (38 mg) was obtained as a white semisolid in 66% yield after flash chromatography and the enantiomeric excess was determined to be more than 99% by HPLC analysis on Chiralpak OD-H column (15% 2-propanol/n-hexane, 1 mL/min), UV 254 nm,  $t$  (major) = 14.93 min,  $t$  (minor) = 26.23 min;  $[\alpha]_D^{20}$  = +11.63 (c 0.086, CHCl<sub>3</sub>); <sup>1</sup>H NMR (400 MHz, CDCl<sub>3</sub>)  $\delta$  7.94 (s, 1H), 7.32 (d,  $J$  = 8.1 Hz, 1H), 7.30 – 7.17 (m, 6H), 7.12 – 7.04 (m, 2H), 6.89-6.87 (m, 1H), 6.86 – 6.79 (m, 2H), 6.68 (d,  $J$  = 7.6 Hz, 1H), 4.12 (brs, 1H), 3.88 – 3.80 (m, 1H), 3.75 (s, 3H), 3.43 (dd,  $J$  = 11.5, 5.5 Hz, 1H), 3.37 – 3.21 (m, 2H), 3.03 (dd,  $J$  = 16.6, 4.4 Hz, 1H), 2.51 (m, 1H). <sup>13</sup>C NMR (75 MHz, CDCl<sub>3</sub>)  $\delta$  156.78, 144.03, 136.37, 134.41, 130.76, 128.93, 128.18, 127.93, 127.68, 127.38, 126.23, 121.51, 121.12, 119.36, 119.19, 110.45, 110.41, 62.31, 55.67, 49.26, 39.99, 29.71. HRMS (ESI)  $m/z$  (M+H)<sup>+</sup> calculated for C<sub>26</sub>H<sub>26</sub>NO: 368.2009, observed: 368.2006.

**((2S,3S,4S)-2-(naphthalen-1-yl)-4-phenyl-2,3,4,9-tetrahydro-1H-carbazol-3-yl) methanol (4ah)**

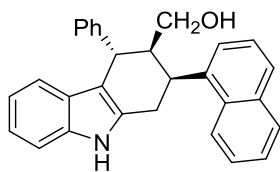

**4ah** (34 mg) was obtained as a white semisolid in 57% yield after flash chromatography and the enantiomeric excess was determined to be 96% by HPLC analysis on Chiralpak AD-H column (20% 2-propanol/n-hexane, 1 mL/min), UV 254 nm,  $t$

(major) = 9.98 min, t (minor) = 7.09 min;  $[\alpha]_D^{20} = -186.4$  (c 0.066,  $\text{CHCl}_3$ );  $^1\text{H}$  NMR (400 MHz,  $\text{CDCl}_3$ )  $\delta$  7.98 (s, 1H), 7.79 (d,  $J = 8.1$  Hz, 1H), 7.72 (d,  $J = 8.0$  Hz, 1H), 7.45 – 7.26 (m, 8H), 7.24-7.22(m, 2H), 7.18-7.16 (m, 1H), 7.03 (t,  $J = 7.6$  Hz, 2H), 6.75 (d,  $J = 8.6$  Hz, 1H), 4.71 (s, 1H), 4.22 (d,  $J = 10.9$  Hz, 1H), 3.65-3.64 (m, 2H), 3.37-3.35 (m, 1H), 2.93 (d,  $J = 15.5$  Hz, 1H), 2.50-2.48 (s, 1H).  $^{13}\text{C}$  NMR (101 MHz,  $\text{CDCl}_3$ )  $\delta$  144.92, 138.35, 136.50, 134.95, 134.06, 131.59, 128.87, 128.83, 128.38, 127.83, 127.37, 126.34, 126.02, 125.46, 124.99, 123.52, 123.07, 121.58, 119.51, 118.92, 110.60, 109.21, 61.28, 50.69, 40.00, 32.69, 24.29. HRMS (ESI)  $m/z$  ( $\text{M}+\text{H}$ ) $^+$  calculated for  $\text{C}_{29}\text{H}_{26}\text{NO}$ : 404.2009, observed: 404.2007.

**((2S,3S,4S)-4-phenyl-2-(thiophen-3-yl)-2,3,4,9-tetrahydro-1H-carbazol-3-yl)methanol (4ai)**

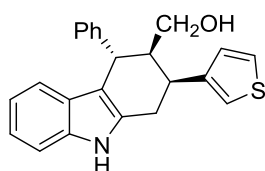

**4ai** (27 mg) was obtained as a white semisolid in 51% yield after flash chromatography and the enantiomeric excess was determined to be more than 99% by HPLC analysis on Chiralpak AD-H column (20% 2-propanol/n-hexane, 1

mL/min), UV 254 nm, t (major) = 10.98 min, t (minor) = 12.06 min;  $[\alpha]_D^{20} = +15.8$  (c 0.076,  $\text{CHCl}_3$ );  $^1\text{H}$  NMR (600 MHz,  $\text{CDCl}_3$ )  $\delta$  7.91 (s, 1H), 7.32 (d,  $J = 8.1$  Hz, 1H), 7.30 – 7.24 (m, 2H), 7.24 – 7.18 (m, 4H), 7.10 (t,  $J = 7.5$  Hz, 1H), 6.95-6.93 (m, 1H), 6.89-6.87 (m, 1H), 6.87 – 6.85 (m, 1H), 6.80 (d,  $J = 7.7$  Hz, 1H), 4.04 (brs, 1H), 3.78-3.76(m, 1H), 3.58-3.56 (m, 1H), 3.49-3.47 (m, 1H), 3.32 (dd,  $J = 16.3, 5.7$  Hz, 1H), 3.01 (dd,  $J = 16.3, 5.8$  Hz, 1H), 2.46 – 2.39 (m, 1H).  $^{13}\text{C}$  NMR (151 MHz,  $\text{CDCl}_3$ )  $\delta$  147.01, 145.70, 139.08, 136.47, 131.40, 131.00, 130.85, 129.97, 129.00, 127.92, 123.93, 123.62, 121.94, 121.86, 113.12, 64.87, 52.77, 42.87, 36.92. HRMS (ESI)  $m/z$  ( $\text{M}+\text{H}$ ) $^+$  calculated for  $\text{C}_{23}\text{H}_{22}\text{NOS}$ : 360.1417, observed: 360.1415.

**((2S,3R,4S)-4-phenyl-2-(thiophen-2-yl)-2,3,4,9-tetrahydro-1H-carbazol-3-yl)methanol (4aj)**

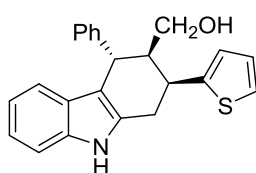

**4aj** (24 mg) was obtained as a white solid in 45% yield after flash chromatography and the enantiomeric excess was determined to be 95% by HPLC analysis on Chiralpak OD-H

column (15% 2-propanol/n-hexane, 1 mL/min), UV 254 nm, t (major) = 12.58 min, t (minor) = 17.25 min;  $[\alpha]_{\text{D}}^{20} = +50.0$  (c 0.034,  $\text{CHCl}_3$ );  $^1\text{H}$  NMR (600 MHz,  $\text{CDCl}_3$ )  $\delta$  7.89 (s, 1H), 7.32 (d,  $J = 8.1$  Hz, 1H), 7.27-7.24 (m, 2H), 7.22-7.20 (m, 3H), 7.09-7.06 (m, 2H), 6.94-6.90 (m, 1H), 6.89-6.84 (m, 2H), 6.79 (d,  $J = 7.5$  Hz, 1H), 4.05 (d,  $J = 26.9$  Hz, 2H), 3.63-3.62 (m, 1H), 3.58-3.51 (m, 1H), 3.41 (dd,  $J = 16.1, 5.1$  Hz, 1H), 3.03 (dd,  $J = 16.1, 4.7$  Hz, 1H), 2.44-2.42 (m, 1H).  $^{13}\text{C}$  NMR (151 MHz,  $\text{CDCl}_3$ )  $\delta$  146.83, 139.23, 135.72, 131.44, 131.03, 129.89, 129.07, 129.00, 127.85, 126.34, 124.04, 121.97, 121.95, 113.13, 64.79, 53.04, 42.93, 37.66. HRMS (ESI)  $m/z$  ( $\text{M}+\text{H}$ ) $^+$  calculated for  $\text{C}_{23}\text{H}_{22}\text{NOS}$ : 360.1417, observed: 360.1415.

**((2S,3R,4S)-2-(furan-2-yl)-4-phenyl-2,3,4,9-tetrahydro-1H-carbazol-3-yl)methanol (4ak)**

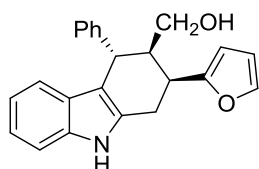

**4ak** (32 mg) was obtained as a white semisolid in 62% yield after flash chromatography and the enantiomeric excess was determined to be 95% by HPLC analysis on Chiralpak OD-H column (15% 2-propanol/n-hexane, 1 mL/min), UV 254 nm, t

(major) = 13.69 min, t (minor) = 21.54 min;  $[\alpha]_{\text{D}}^{20} = +7.14$  (c 0.084,  $\text{CHCl}_3$ );  $^1\text{H}$  NMR (400 MHz,  $\text{CDCl}_3$ )  $\delta$  7.84 (s, 1H), 7.32-7.09 (m, 7H), 7.06-6.97 (m, 1H), 6.87-6.71 (m, 2H), 6.20 (q,  $J = 3.1, 1.9$  Hz, 1H), 5.86 (d,  $J = 3.2$  Hz, 1H), 4.09 (d,  $J = 5.3$  Hz, 1H), 3.62-3.60 (m, 1H), 3.54 (d,  $J = 6.8$  Hz, 2H), 3.20 (dd,  $J = 16.4, 5.5$  Hz, 1H), 2.95 (dd,  $J = 16.3, 7.1$  Hz, 1H), 2.46-2.42 (m, 1H).  $^{13}\text{C}$  NMR (101 MHz,  $\text{CDCl}_3$ )  $\delta$  156.67, 144.26, 141.01, 136.37, 133.11, 128.67, 128.35, 127.41, 126.35, 121.35, 119.32, 119.12, 110.47, 110.30, 105.67, 62.51, 49.01, 40.09, 32.53. HRMS (ESI)  $m/z$  ( $\text{M}+\text{H}$ ) $^+$  calculated for  $\text{C}_{23}\text{H}_{22}\text{NO}_2$ : 344.1645, observed: 344.1641.

**methyl(E)-3-((2S,3S,4S)-2,4-diphenyl-2,3,4,9-tetrahydro-1H-carbazol-3-yl)acrylate (D1)**

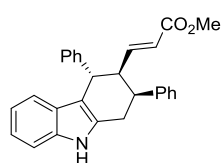

**D1** (25 mg) was obtained as a white solid in 41% yield after flash chromatography and the enantiomeric excess was determined to be 99% by HPLC analysis on Chiralpak AD-H column (15%

2-propanol/n-hexane, 1 mL/min), UV 254 nm, t (major) = 6.53 min, t (minor) = 5.40

min;  $[\alpha]_D^{20} = +41.38$  (c 0.058,  $\text{CHCl}_3$ );  $^1\text{H}$  NMR (600 MHz,  $\text{CDCl}_3$ )  $\delta$  7.99 (s, 1H), 7.36 (d,  $J = 8.1$  Hz, 1H), 7.30 – 7.20 (m, 6H), 7.15 (dd,  $J = 15.4, 7.4$  Hz, 3H), 7.04 (d,  $J = 7.2$  Hz, 3H), 6.97 (dd,  $J = 15.8, 8.6$  Hz, 2H), 5.62 (d,  $J = 15.7$  Hz, 1H), 4.32 (brs, 1H), 3.65 (s, 3H), 3.48-3.46 (m, 1H), 3.19 (dd,  $J = 16.2, 10.4$  Hz, 1H), 3.11 (dd,  $J = 16.2, 4.7$  Hz, 1H), 3.02-3.00 (m, 1H).  $^{13}\text{C}$  NMR (151 MHz,  $\text{CDCl}_3$ )  $\delta$  169.39, 151.09, 146.29, 144.53, 139.11, 136.88, 131.15, 131.01, 131.00, 130.58, 129.99, 129.37, 129.14, 125.55, 124.23, 122.11, 121.51, 113.20, 55.05, 54.09, 45.78, 32.37. HRMS (ESI)  $m/z$  ( $\text{M}+\text{H}$ ) $^+$  calculated for  $\text{C}_{28}\text{H}_{26}\text{NO}_2$ : 407.1885, observed: 407.1882.

**((2S,3S,4S)-2,4-diphenyl-2,3,4,9-tetrahydro-1H-carbazol-3-yl)methyl**

**4-bromobenzoate (D2)**

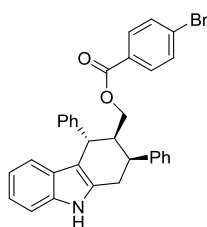

**D2** (70 mg) was obtained as a white semisolid in 65% yield after flash chromatography and the enantiomeric excess was determined to be 96% by HPLC analysis on Chiralpak AD-H column (15% 2-propanol/n-hexane, 1 mL/min), UV 254 nm,  $t$  (major) = 9.16 min,  $t$  (minor) = 10.89 min;  $[\alpha]_D^{20} = +11.76$  (c 0.068,  $\text{CHCl}_3$ );  $^1\text{H}$  NMR (600 MHz,  $\text{CDCl}_3$ )  $\delta$  8.00 (s, 1H), 7.69-7.67 (m, 2H), 7.57 – 7.50 (m, 2H), 7.35 (d,  $J = 8.1$  Hz, 1H), 7.30 (t,  $J = 7.1$  Hz, 2H), 7.28 – 7.17 (m, 6H), 7.13 (d,  $J = 6.9$  Hz, 3H), 6.91 (dd,  $J = 14.9, 7.8$  Hz, 2H), 4.32 – 4.25 (m, 2H), 4.23 – 4.17 (m, 1H), 3.64 (brs, 1H), 3.31 (d,  $J = 14.5$  Hz, 1H), 3.20 (dd,  $J = 16.1, 7.7$  Hz, 1H), 2.79-2.76 (m, 1H).  $^{13}\text{C}$  NMR (151 MHz,  $\text{CDCl}_3$ )  $\delta$  168.31, 146.50, 144.66, 139.13, 136.54, 134.27, 133.66, 131.67, 131.26, 131.21, 131.13, 130.64, 130.48, 130.00, 129.37, 129.19, 124.13, 122.04, 121.73, 113.17, 67.44, 50.20, 43.24, 32.36. HRMS (ESI)  $m/z$  ( $\text{M}+\text{H}$ ) $^+$  calculated for  $\text{C}_{32}\text{H}_{27}\text{BrNO}_2$ : 536.1212, observed: 536.1225.

## 7. X-ray Single Crystal Data for 4aa

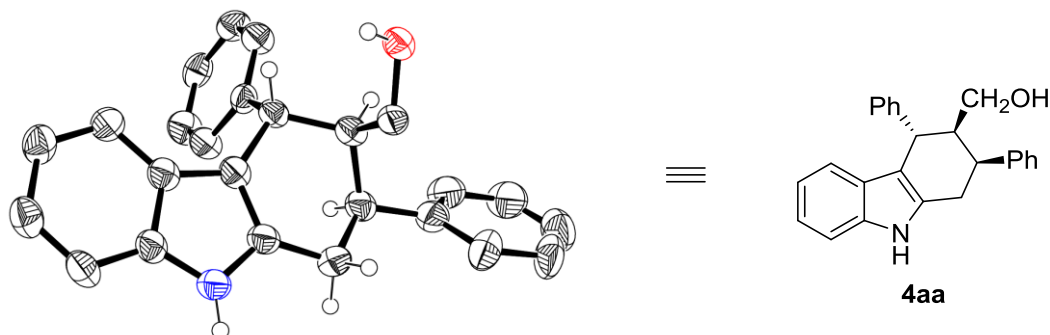

|                                   |                                                  |          |
|-----------------------------------|--------------------------------------------------|----------|
| Identification code               | cu_dm16449_0m                                    |          |
| Empirical formula                 | C <sub>27</sub> H <sub>27</sub> N O <sub>2</sub> |          |
| Formula weight                    | 397.50                                           |          |
| Temperature                       | 130 K                                            |          |
| Wavelength                        | 1.54178 Å                                        |          |
| Crystal system                    | Orthorhombic                                     |          |
| Space group                       | P 21 21 21                                       |          |
| Unit cell dimensions              | a = 14.0799(3) Å                                 | α = 90°. |
|                                   | b = 14.3773(3) Å                                 | β = 90°. |
|                                   | c = 44.2794(10) Å                                | γ = 90°. |
| Volume                            | 8963.5(3) Å <sup>3</sup>                         |          |
| Z                                 | 16                                               |          |
| Density (calculated)              | 1.178 Mg/m <sup>3</sup>                          |          |
| Absorption coefficient            | 0.576 mm <sup>-1</sup>                           |          |
| F(000)                            | 3392                                             |          |
| Crystal size                      | 0.12 x 0.1 x 0.03 mm <sup>3</sup>                |          |
| Theta range for data collection   | 1.995 to 66.658°.                                |          |
| Index ranges                      | -16 ≤ h ≤ 16, -17 ≤ k ≤ 9, -52 ≤ l ≤ 52          |          |
| Reflections collected             | 41784                                            |          |
| Independent reflections           | 15250 [R(int) = 0.1282]                          |          |
| Completeness to theta = 66.658°   | 99.5 %                                           |          |
| Absorption correction             | Semi-empirical from equivalents                  |          |
| Max. and min. transmission        | 0.7528 and 0.5466                                |          |
| Refinement method                 | Full-matrix least-squares on F <sup>2</sup>      |          |
| Data / restraints / parameters    | 15250 / 0 / 1090                                 |          |
| Goodness-of-fit on F <sup>2</sup> | 1.004                                            |          |
| Final R indices [I > 2σ(I)]       | R1 = 0.0696, wR2 = 0.1718                        |          |
| R indices (all data)              | R1 = 0.0979, wR2 = 0.1947                        |          |



|                              |                                    |
|------------------------------|------------------------------------|
| Absolute structure parameter | 0.3(3)                             |
| Extinction coefficient       | 0.00110(13)                        |
| Largest diff. peak and hole  | 0.284 and -0.259 e.Å <sup>-3</sup> |

## 8. $^1\text{H}$ NMR and $^{13}\text{C}$ NMR Spectra for the Product

### (2,4-diphenyl-2,3,4,9-tetrahydro-1H-carbazol-3-yl)methanol (4aa)

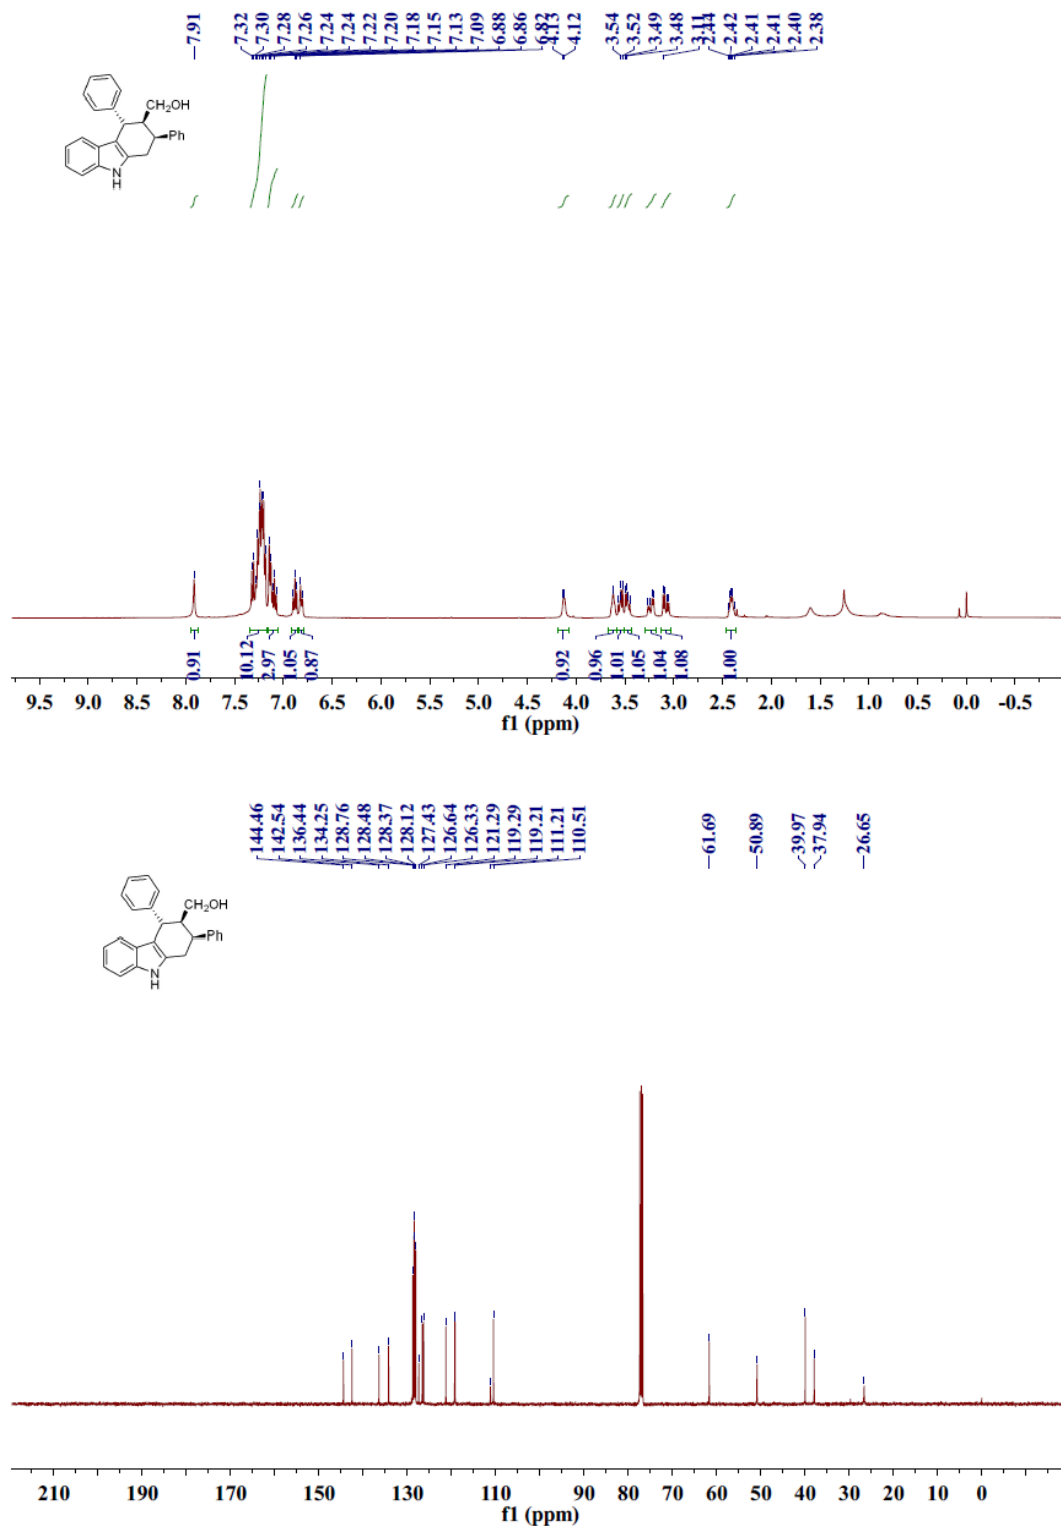

**(2-phenyl-4-(o-tolyl)-2,3,4,9-tetrahydro-1H-carbazol-3-yl)methanol (4ba)**

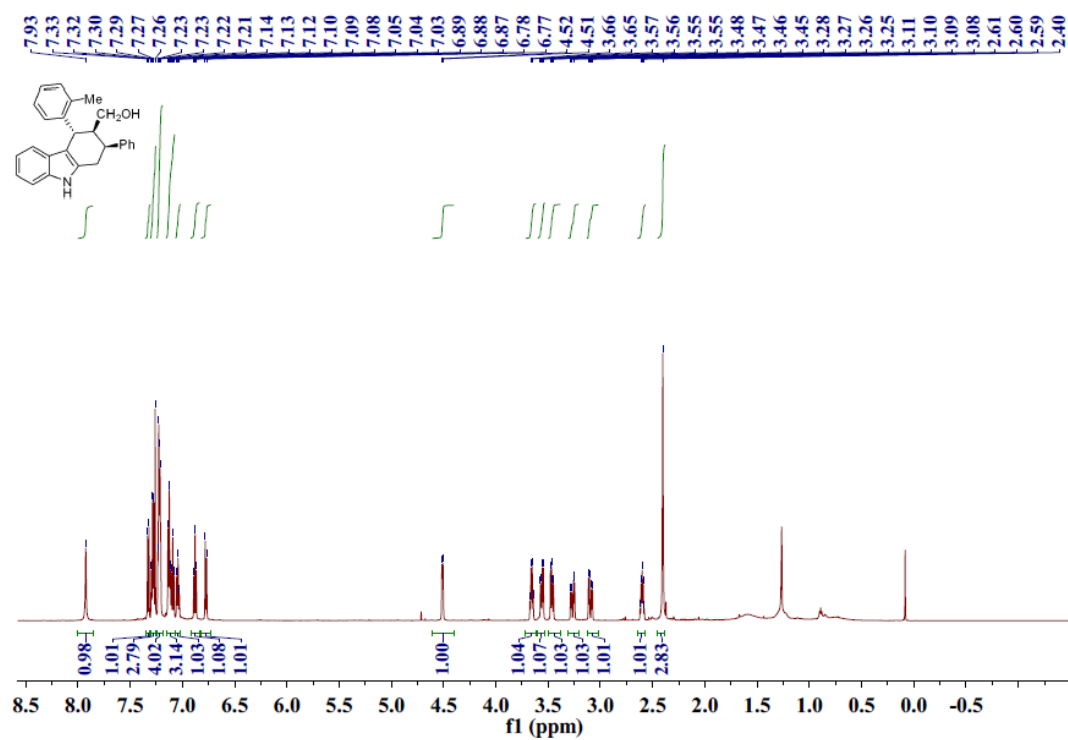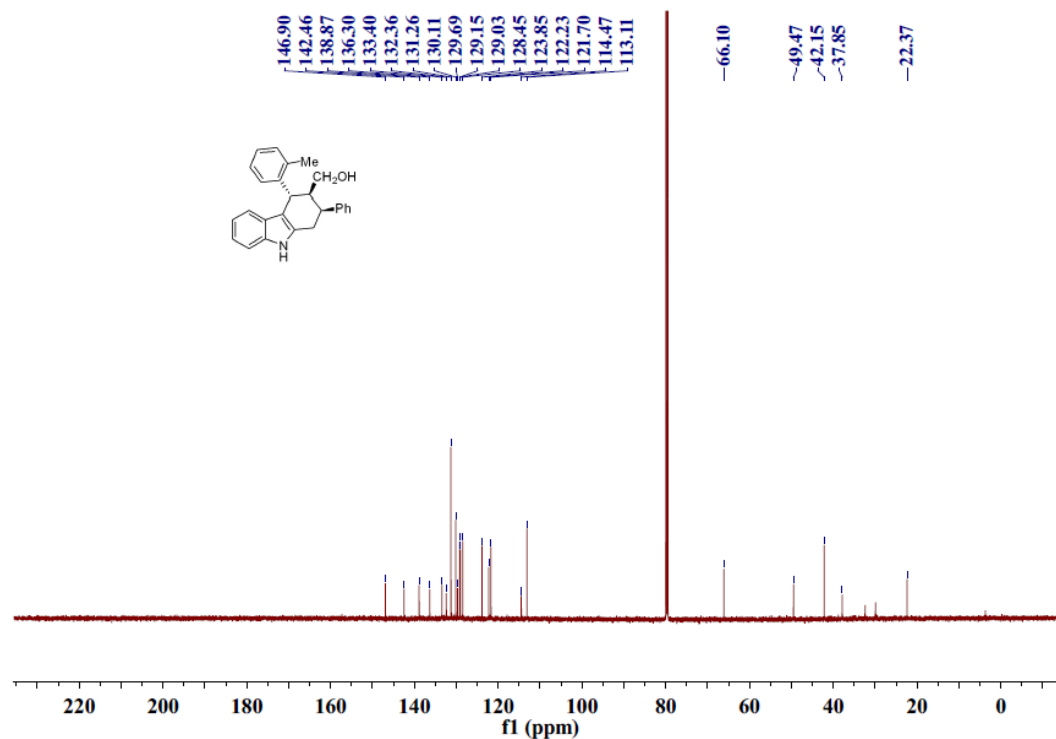

(2-phenyl-4-(m-tolyl)-2,3,4,9-tetrahydro-1H-carbazol-3-yl)methanol (4ca)

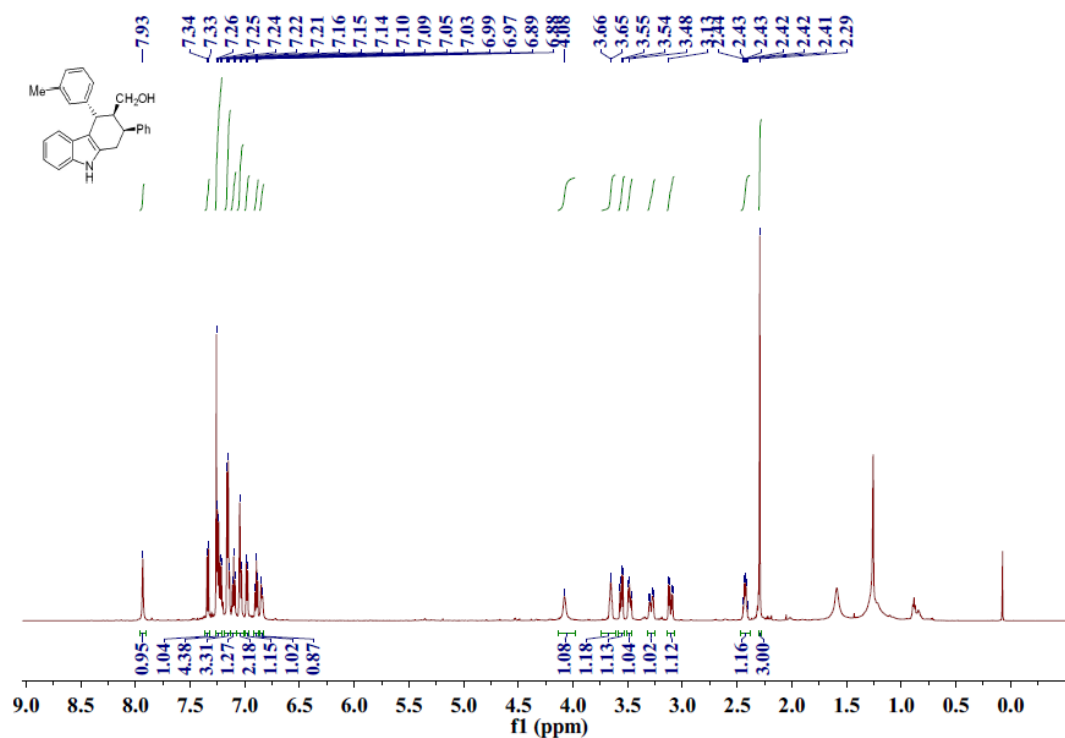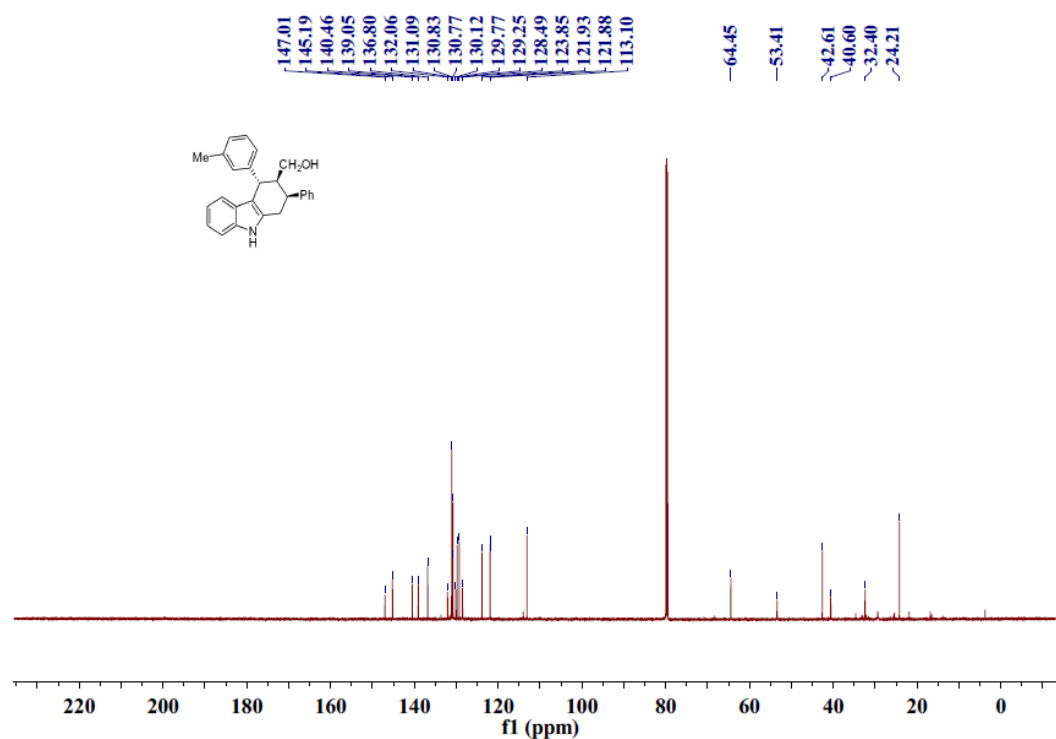

**(2-phenyl-4-(p-tolyl)-2,3,4,9-tetrahydro-1H-carbazol-3-yl)methanol (4da)**

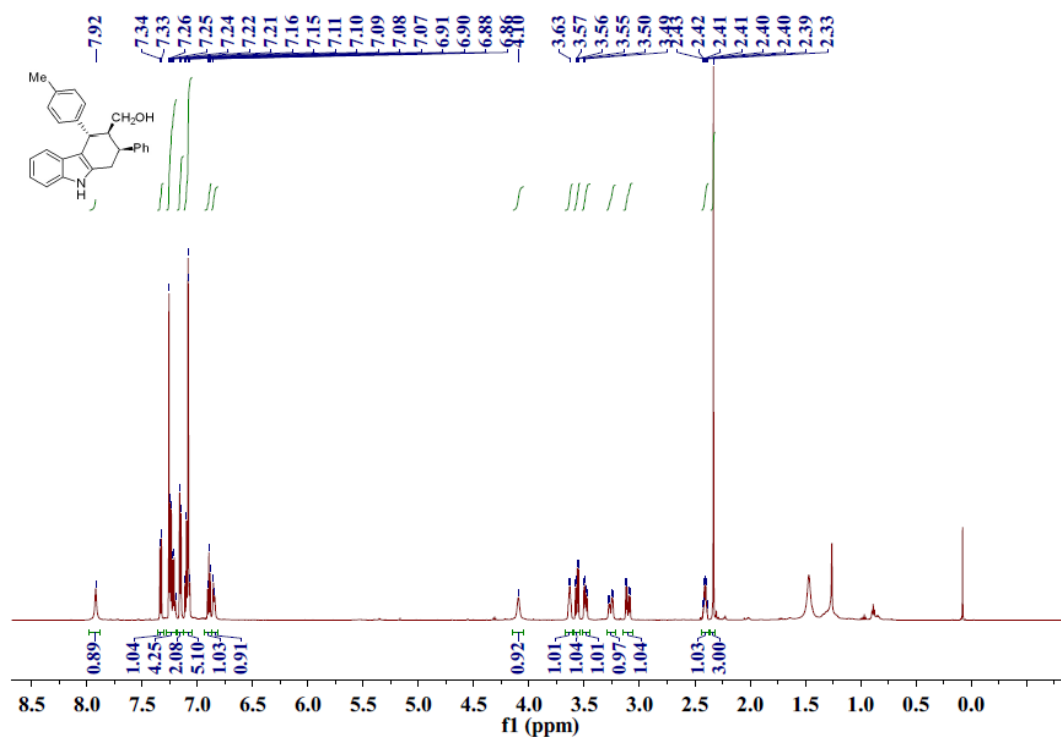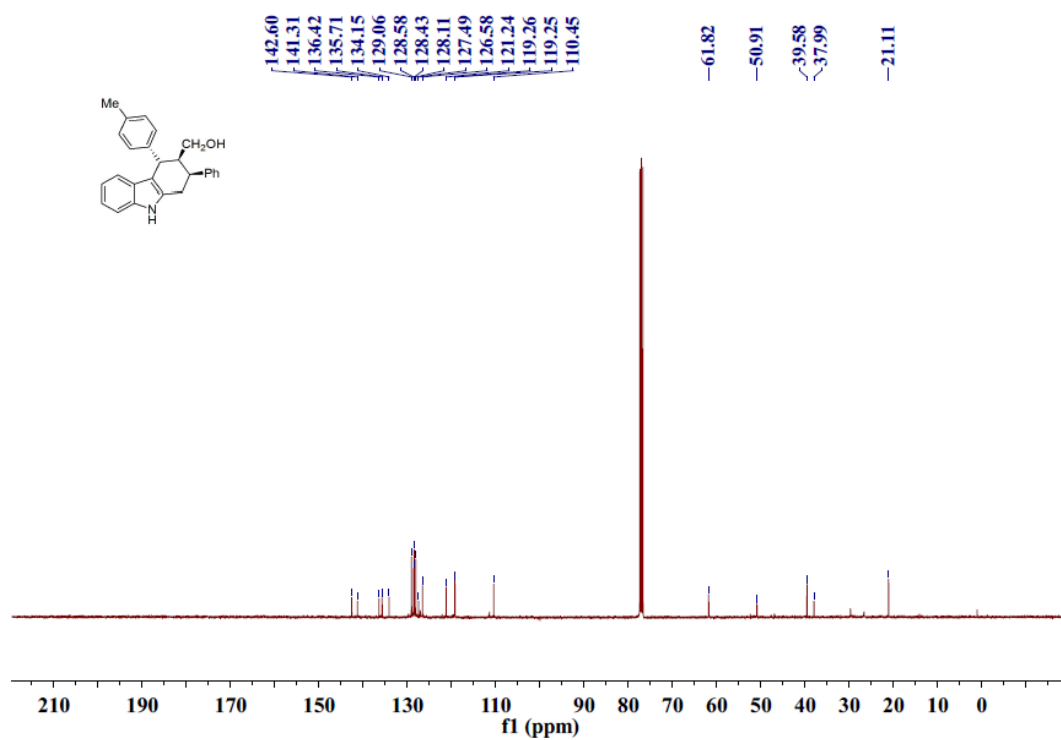

**(4-(2-chlorophenyl)-2-phenyl-2,3,4,9-tetrahydro-1H-carbazol-3-yl)methanol (4ea)**

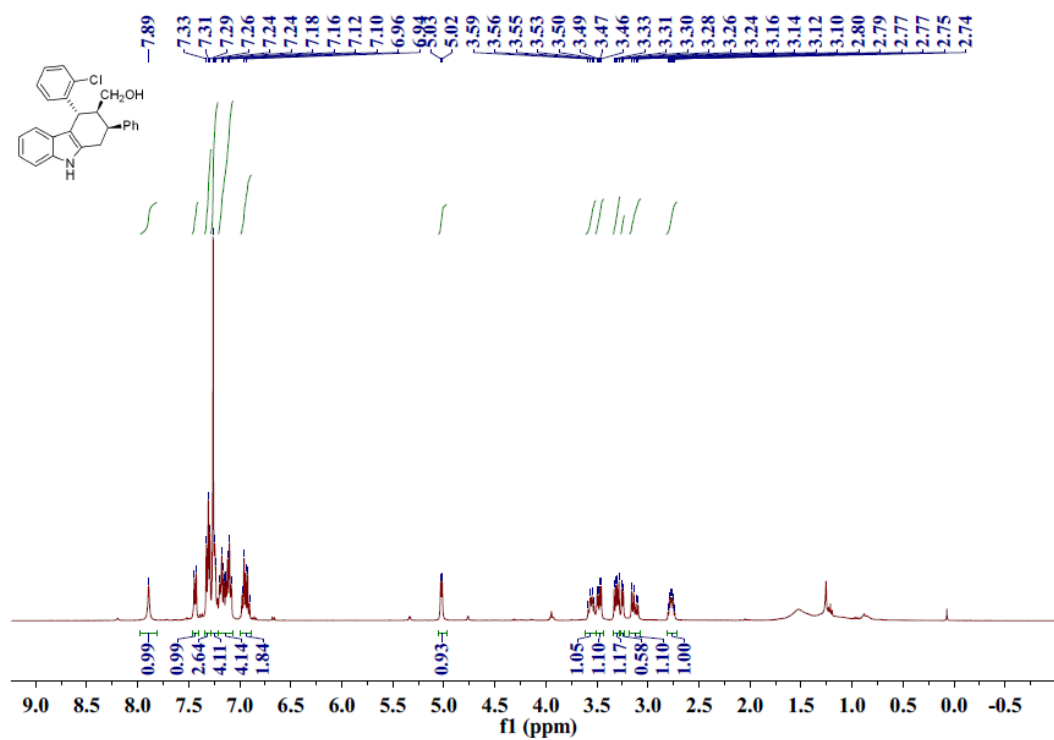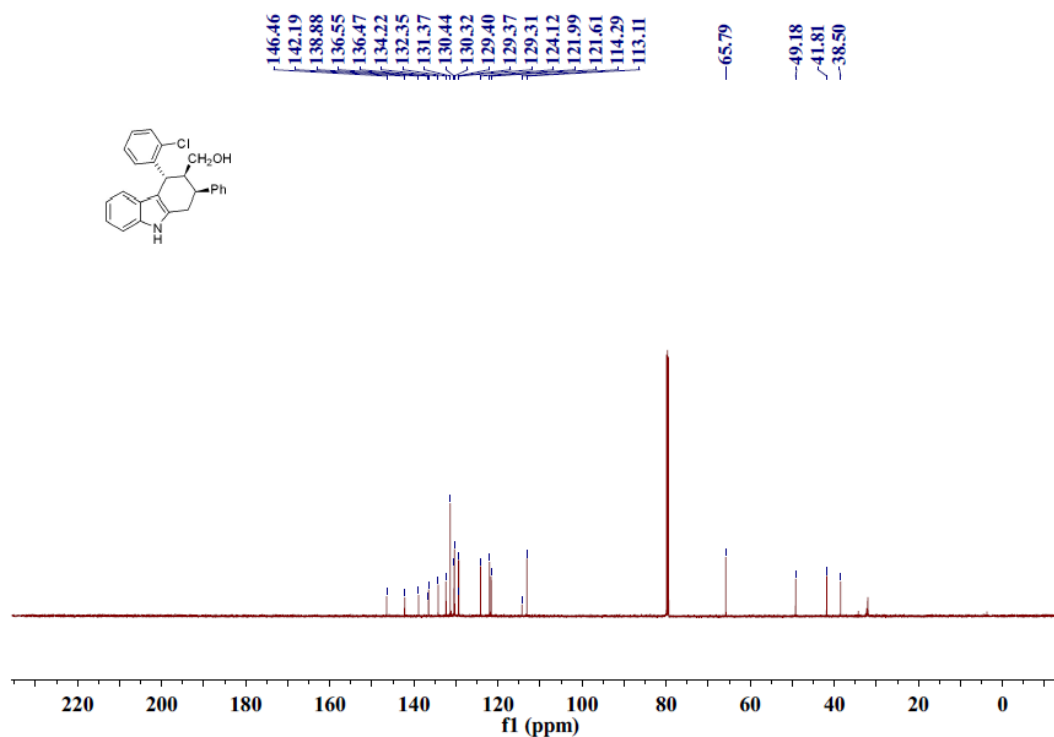

**(4-(3-chlorophenyl)-2-phenyl-2,3,4,9-tetrahydro-1H-carbazol-3-yl)methanol (4fa)**

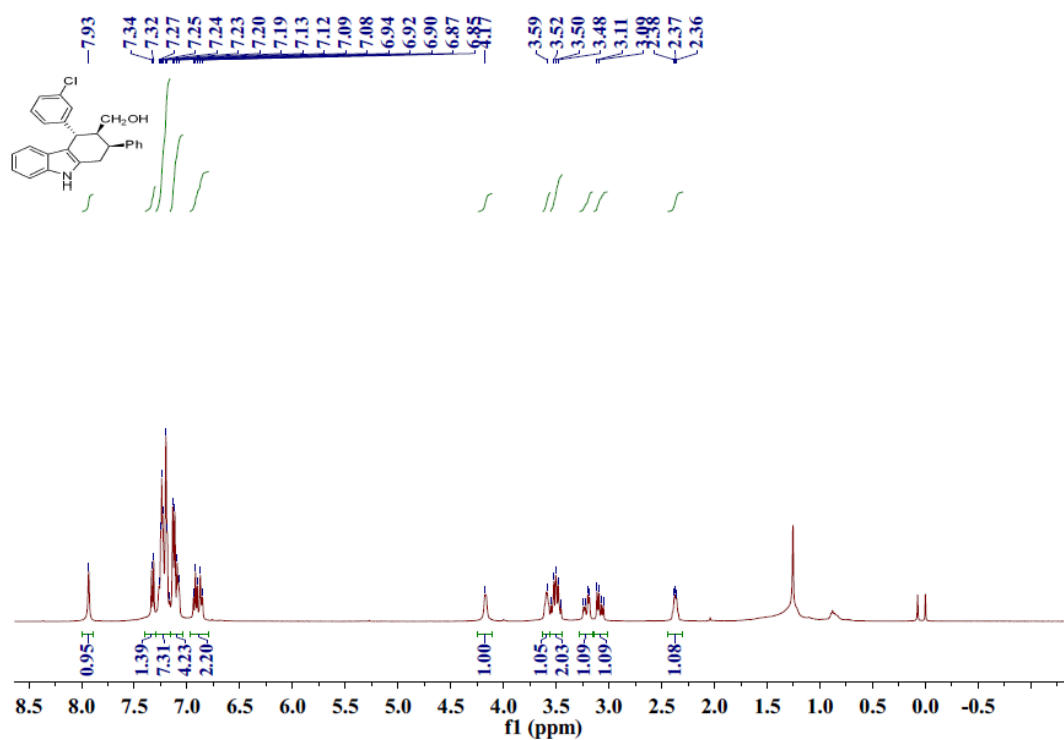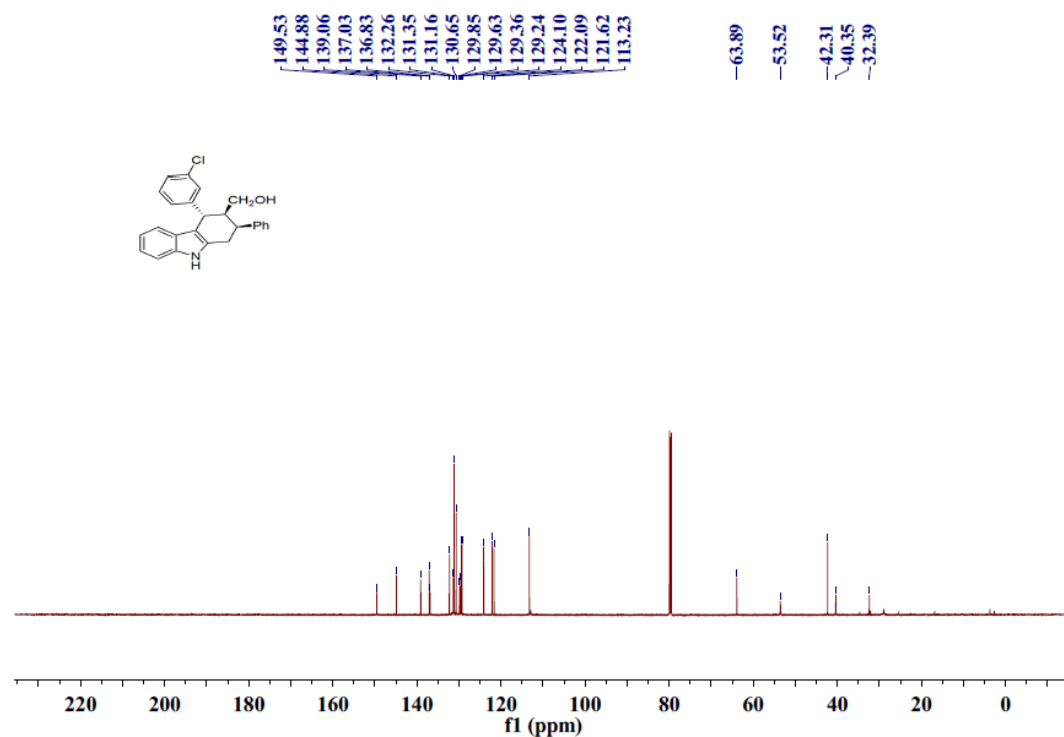

**(4-(4-chlorophenyl)-2-phenyl-2,3,4,9-tetrahydro-1H-carbazol-3-yl)methanol**  
**(4ga)**

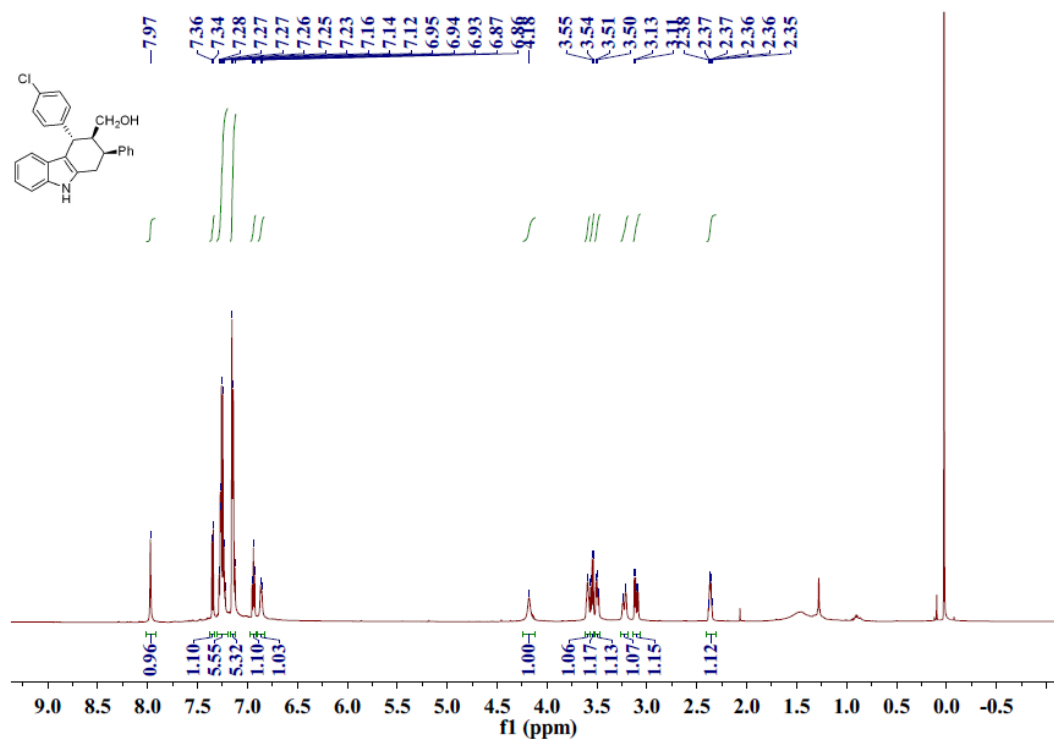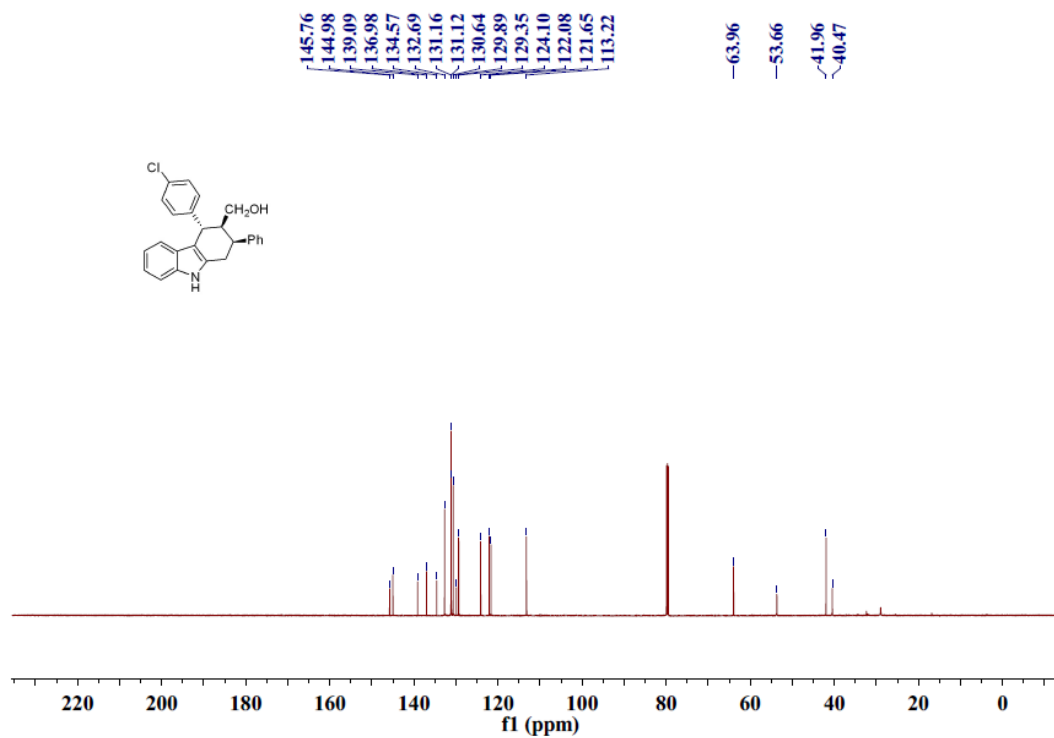



**(4-(4-bromophenyl)-2-phenyl-2,3,4,9-tetrahydro-1H-carbazol-3-yl)methanol**  
**(4ha)**

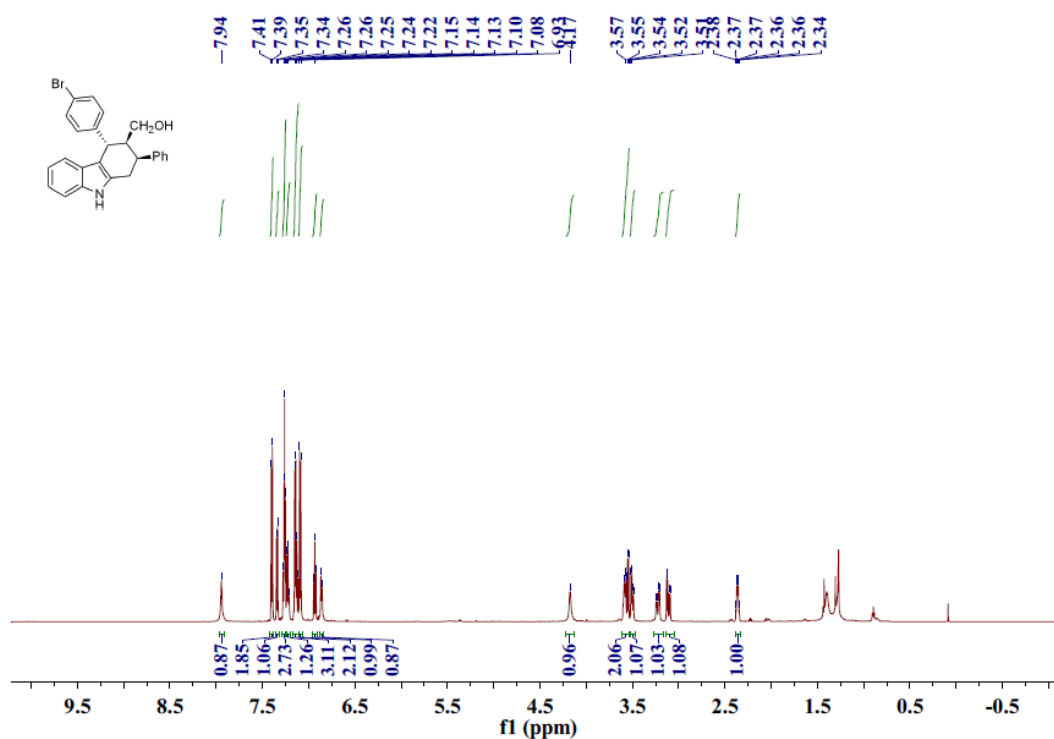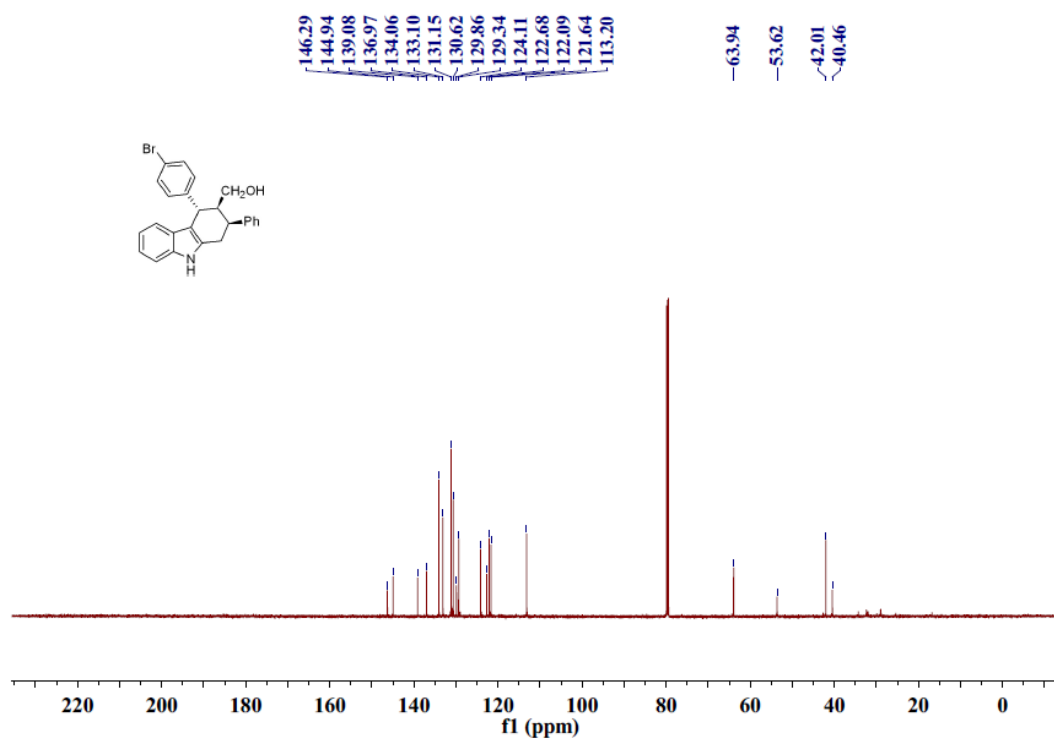

**(2-phenyl-4-(4-(trifluoromethyl)phenyl)-2,3,4,9-tetrahydro-1H-carbazol-3-yl)methanol (4ia)**

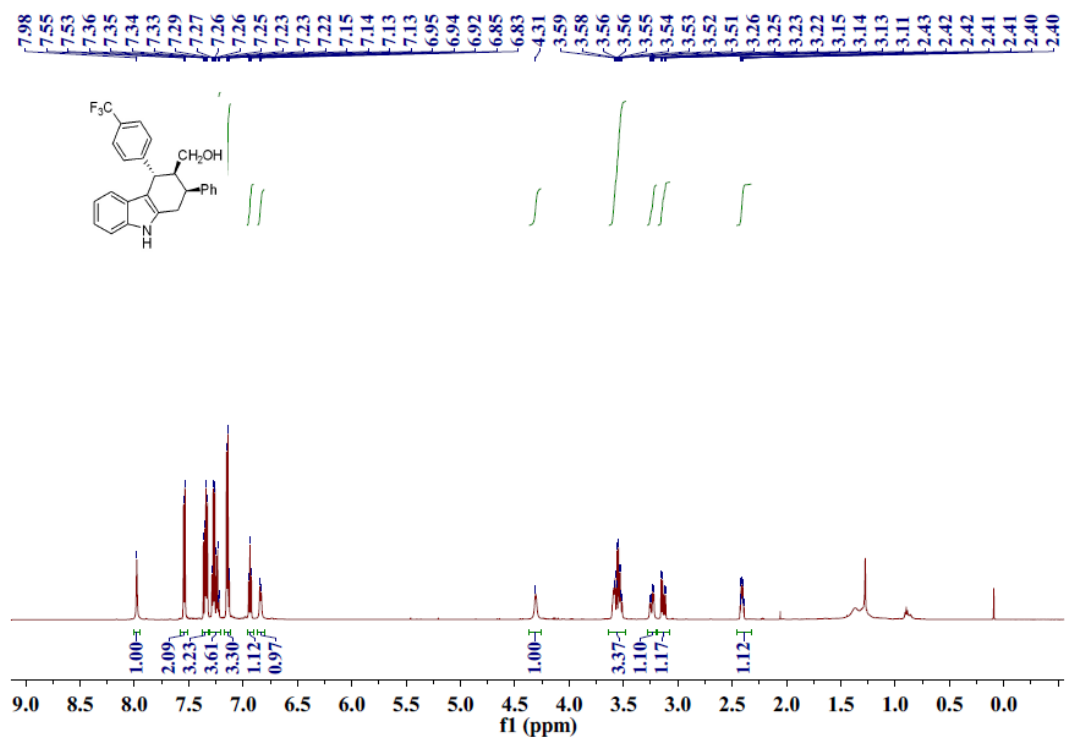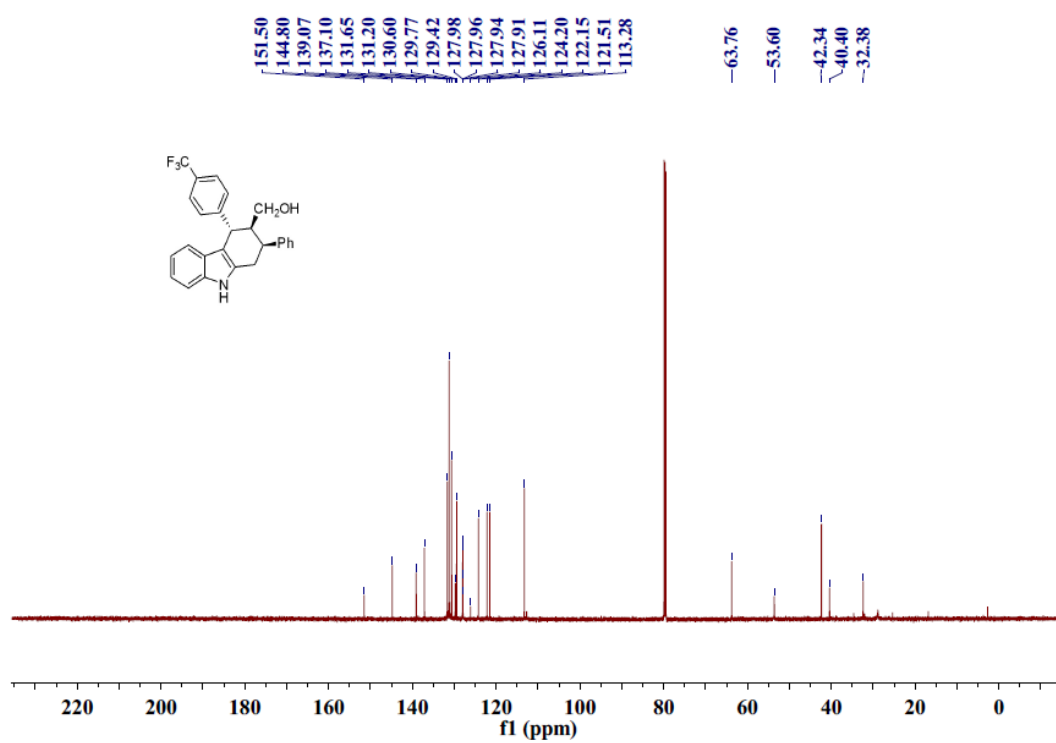

**4-3-(hydroxymethyl)-2-phenyl-2,3,4,9-tetrahydro-1H-carbazol-4-yl)benzonitrile (4ja)**

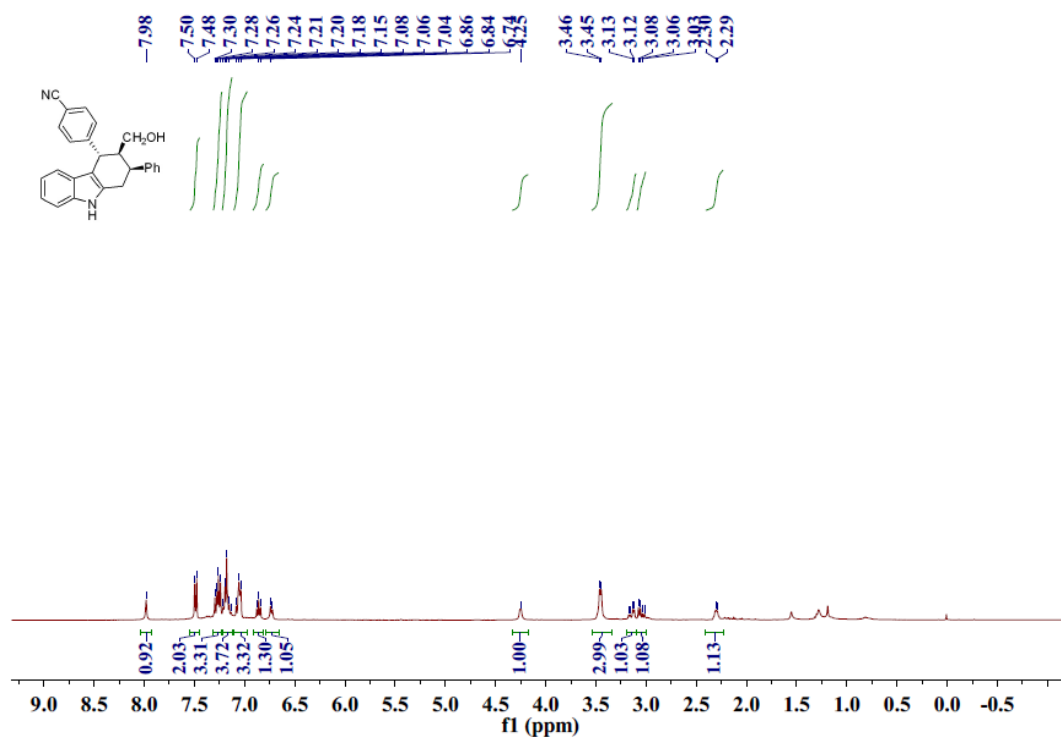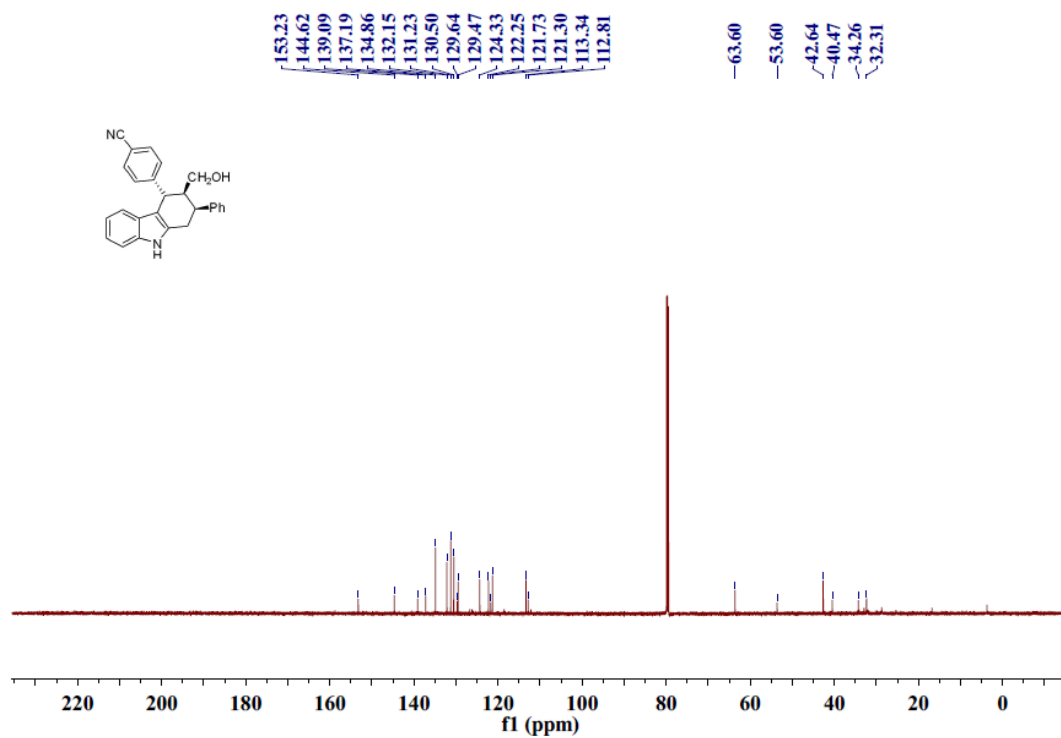

**methyl 4-(3-(hydroxymethyl)-2-phenyl-2,3,4,9-tetrahydro-1H-carbazol-4-yl)benzoate (4ka)**

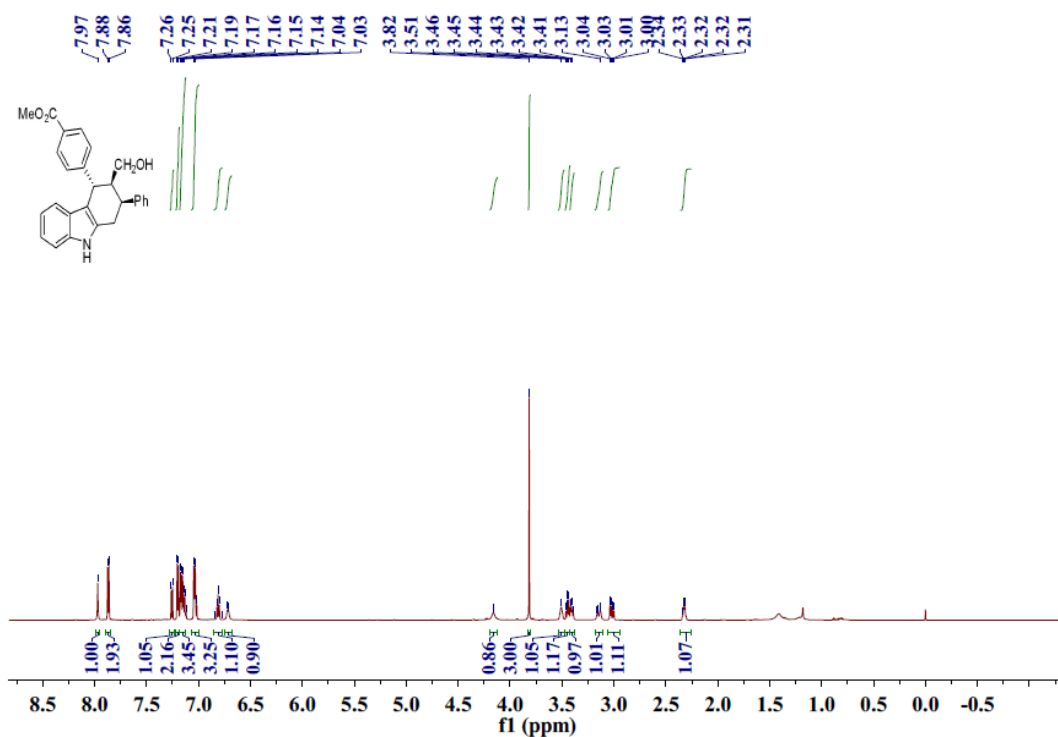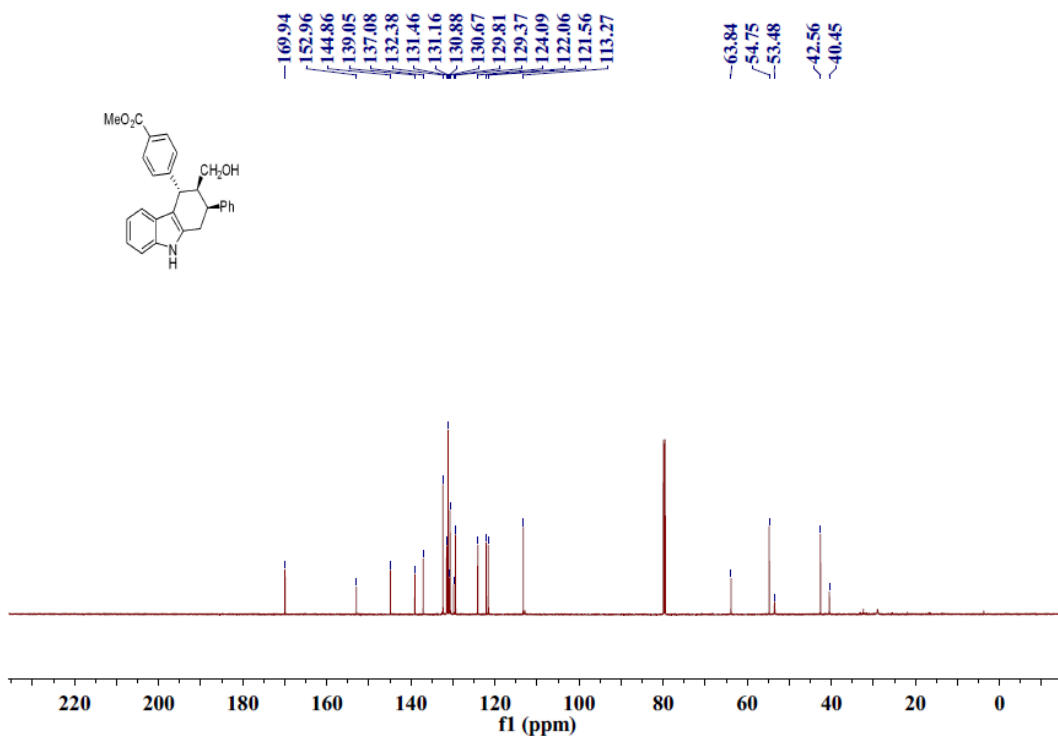

**(4-(4-methoxyphenyl)-2-phenyl-2,3,4,9-tetrahydro-1H-carbazol-3-yl)methanol**  
**(4la)**

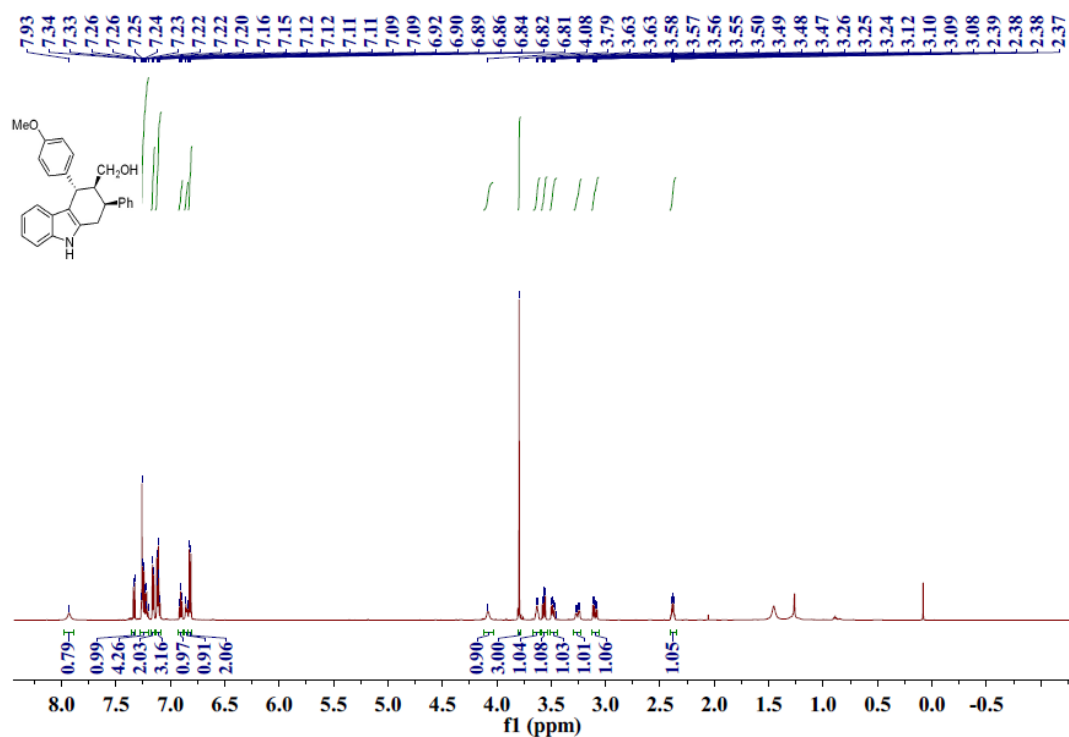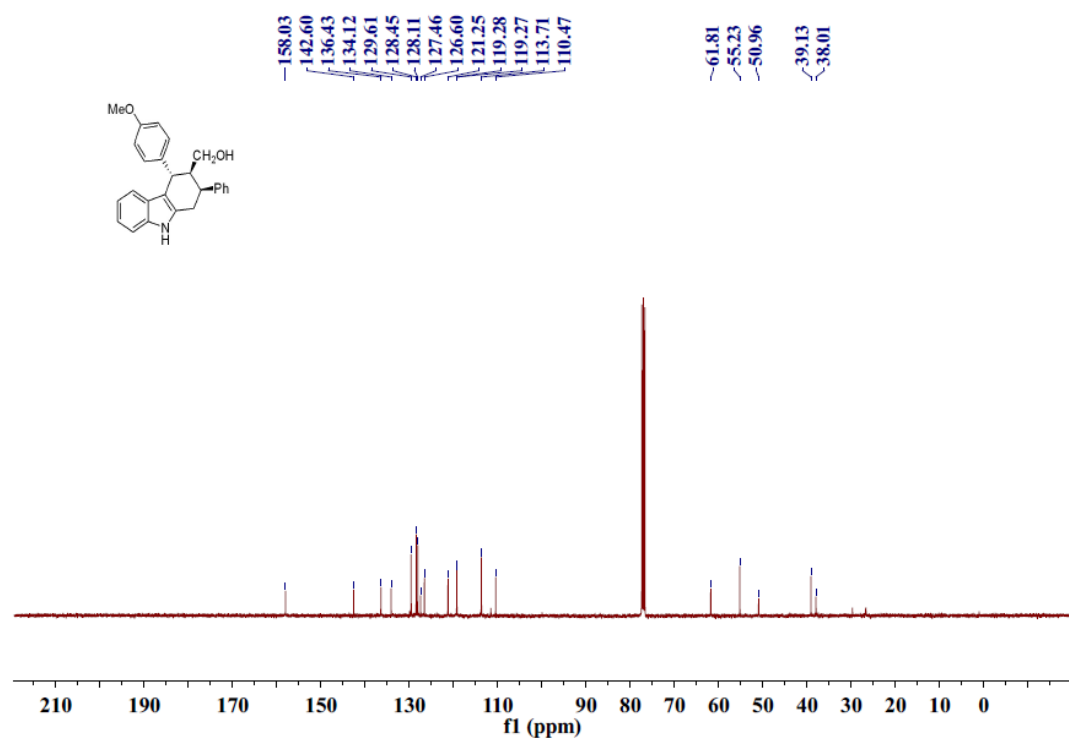

**(4-(naphthalen-1-yl)-2-phenyl-2,3,4,9-tetrahydro-1H-carbazol-3-yl)methanol**  
**(4ma)**

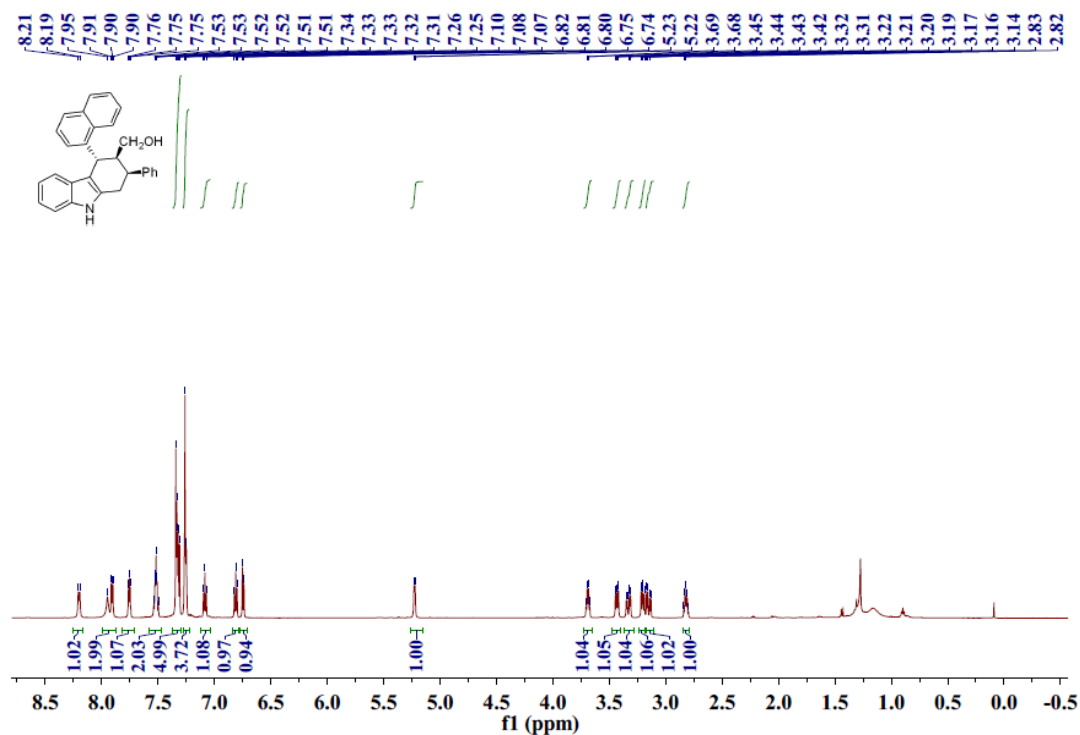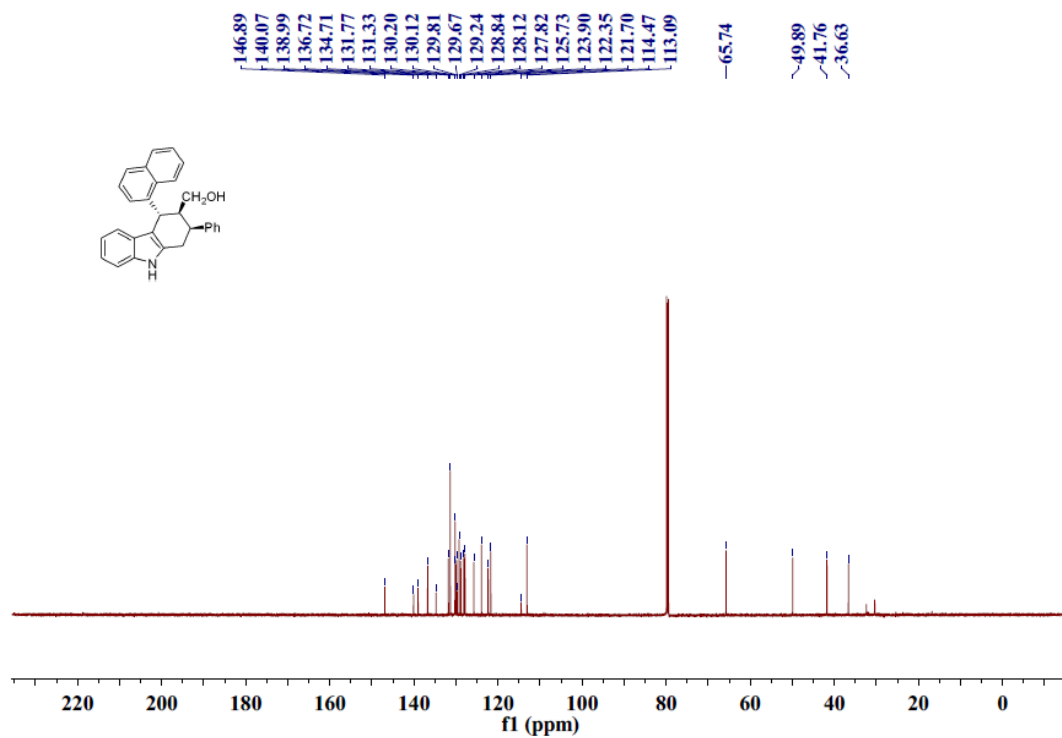

**(2-phenyl-4-(thiophen-2-yl)-2,3,4,9-tetrahydro-1H-carbazol-3-yl)methanol (4na)**

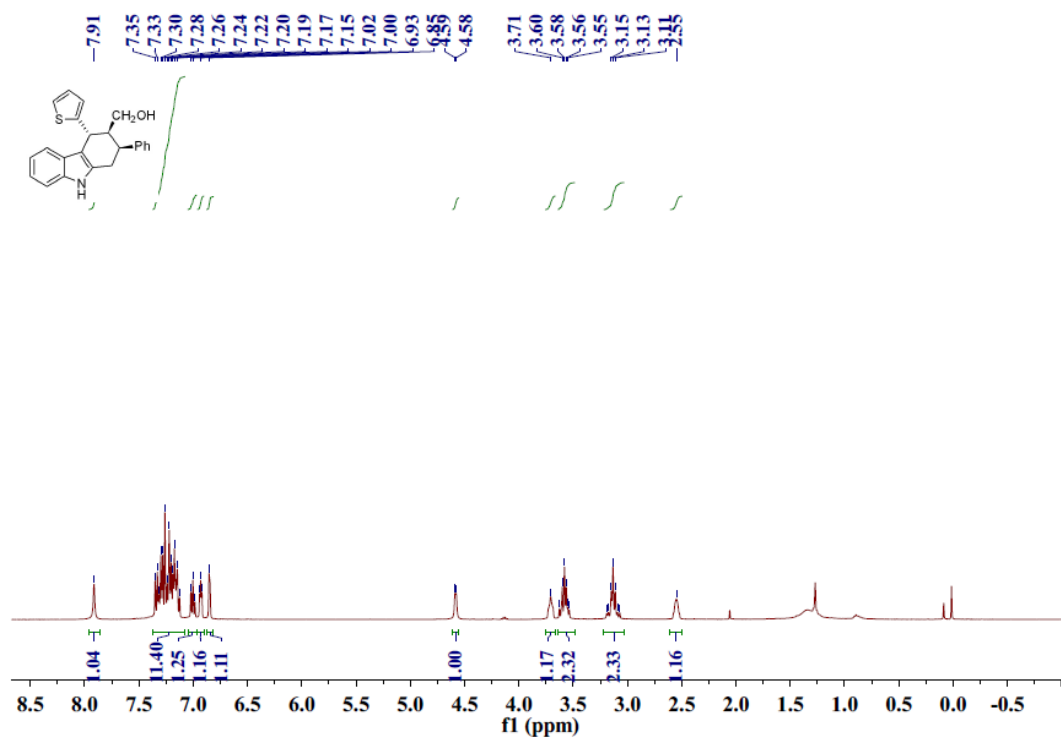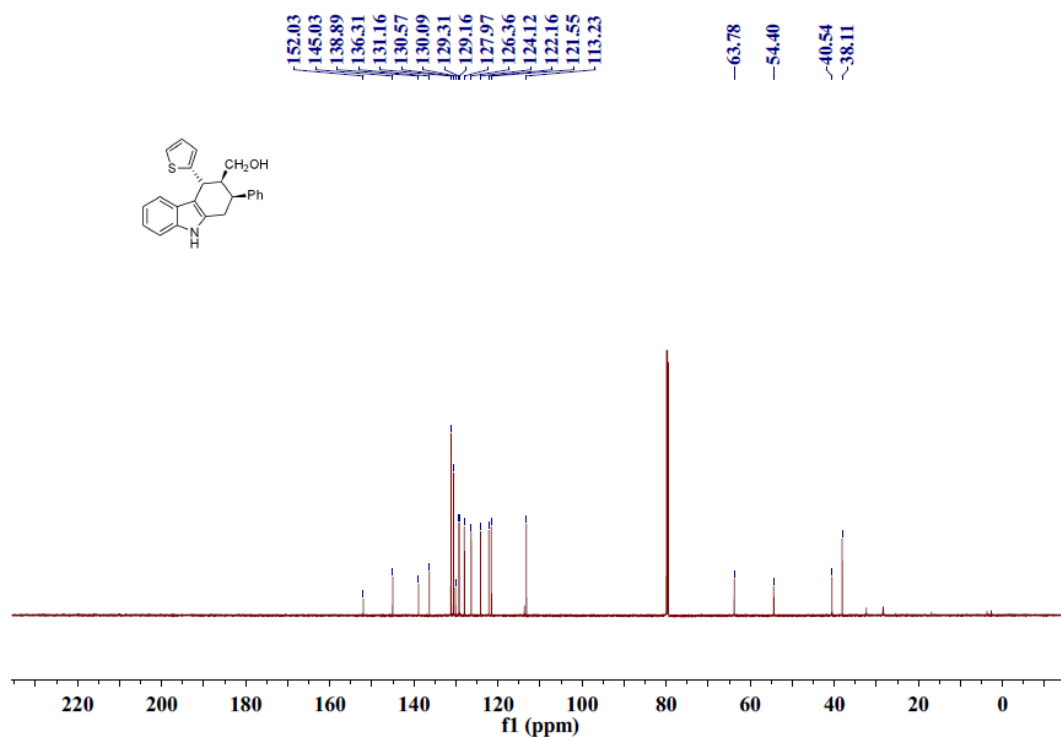

**(7-methyl-2,4-diphenyl-2,3,4,9-tetrahydro-1H-carbazol-3-yl)methanol (4oa)**

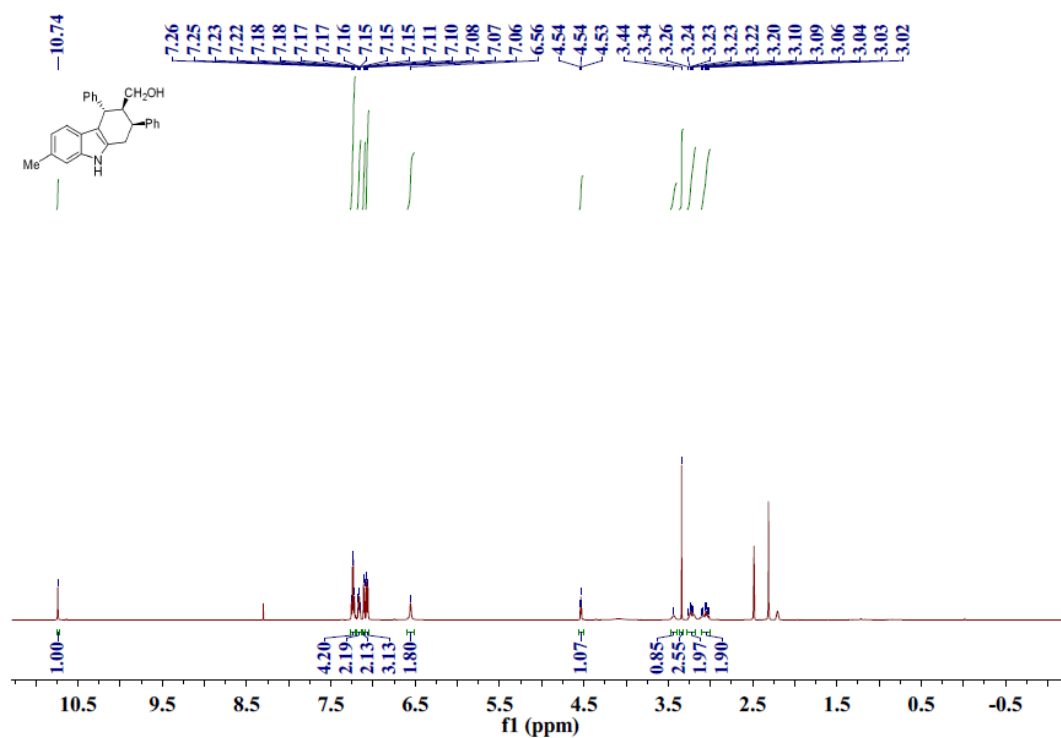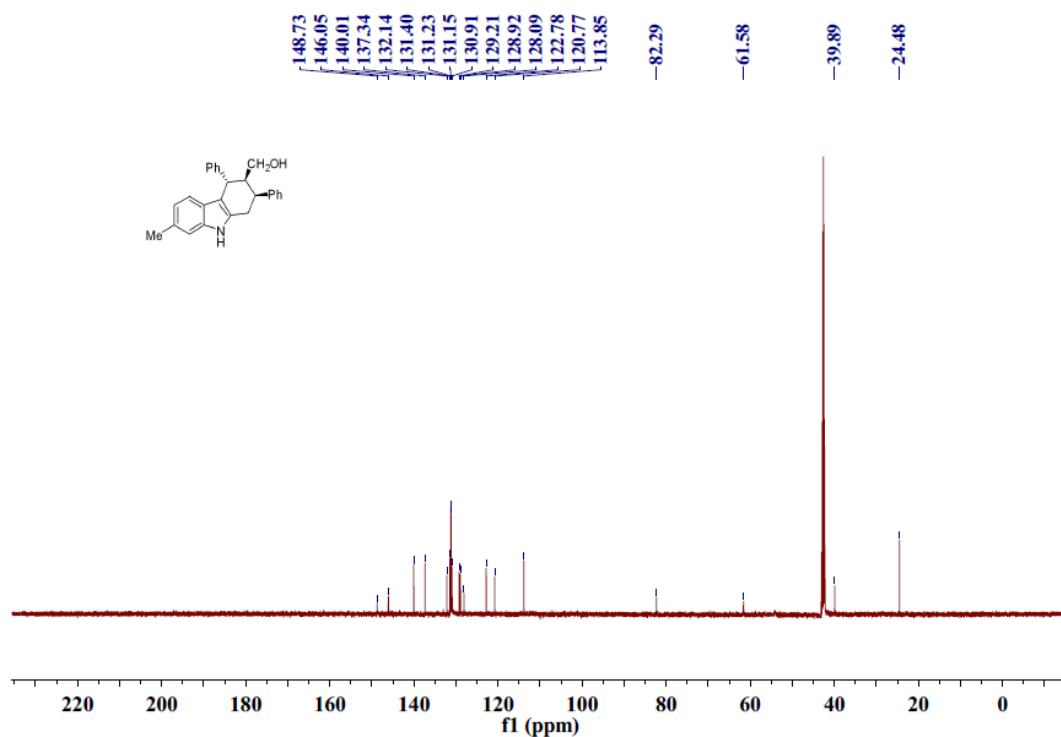



(7-fluoro-2,4-diphenyl-2,3,4,9-tetrahydro-1H-carbazol-3-yl)methanol (4pa)

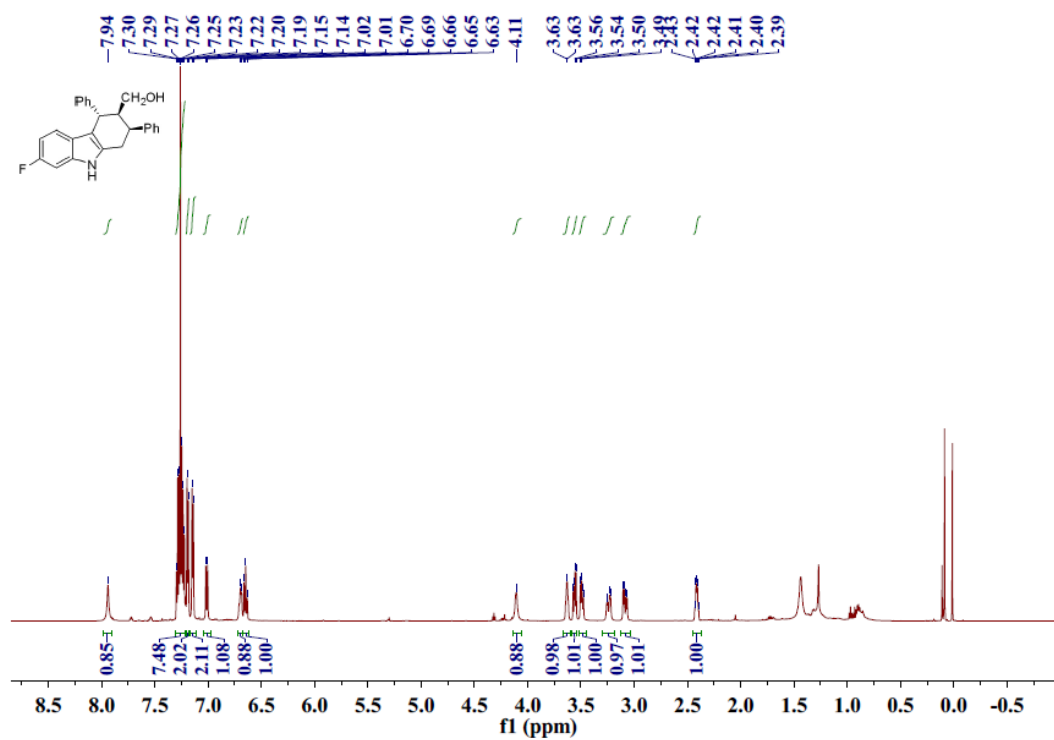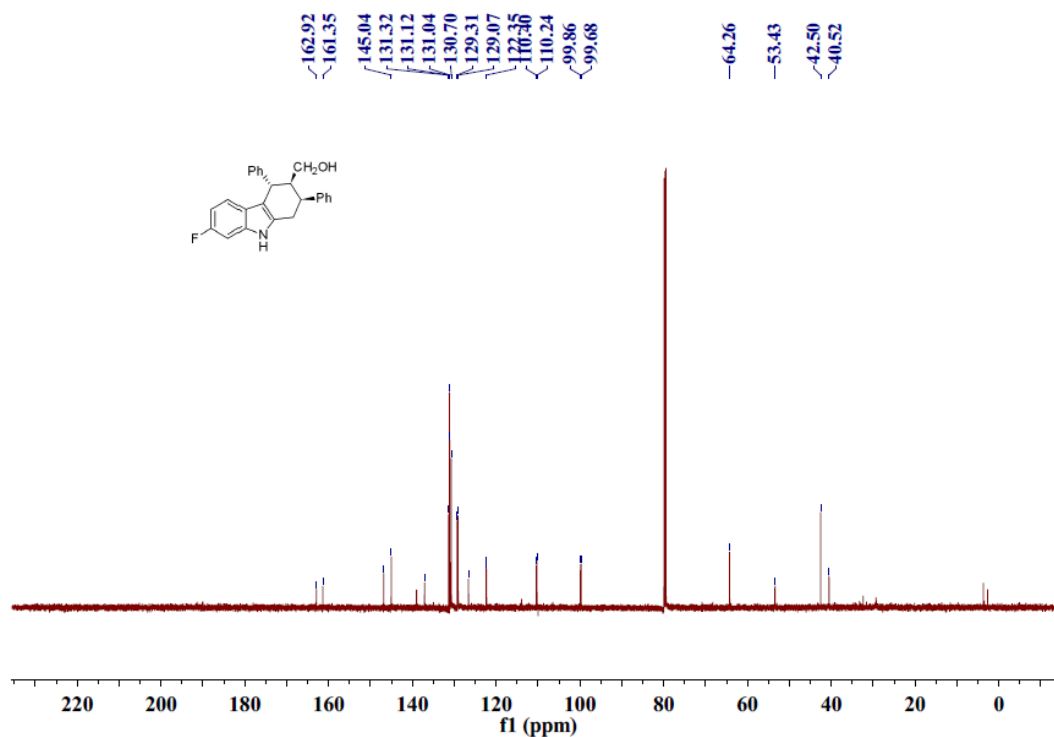

**methyl-3-(hydroxymethyl)-2,4-diphenyl-2,3,4,9-tetrahydro-1H-carbazole-7-carboxylate (4qa)**

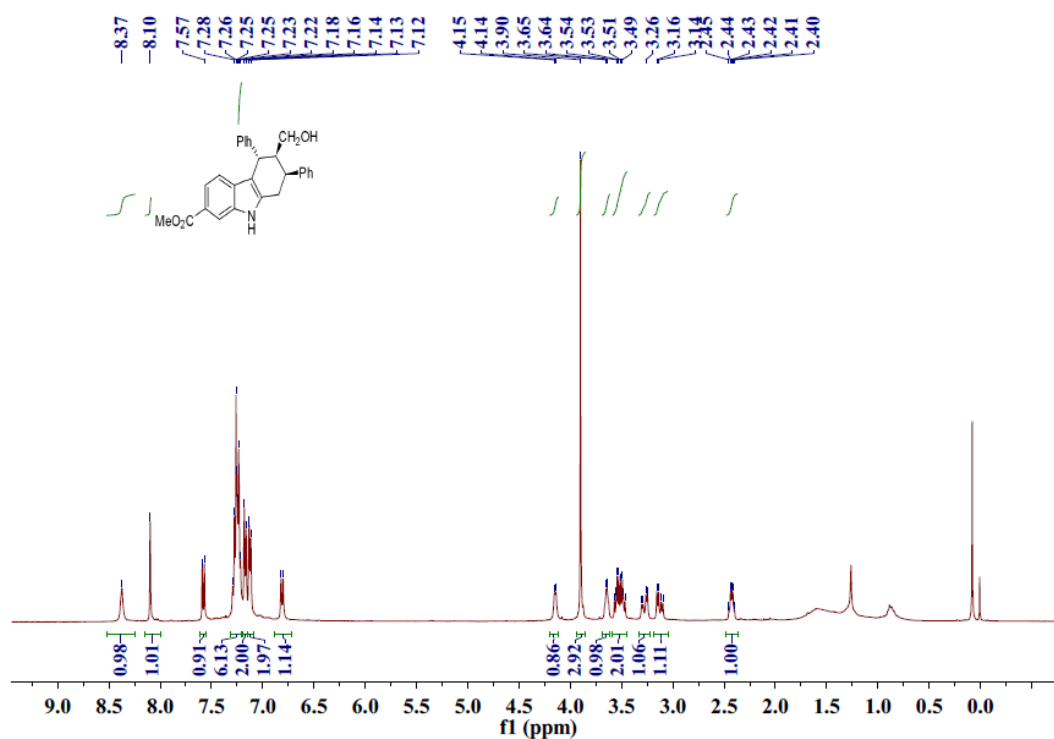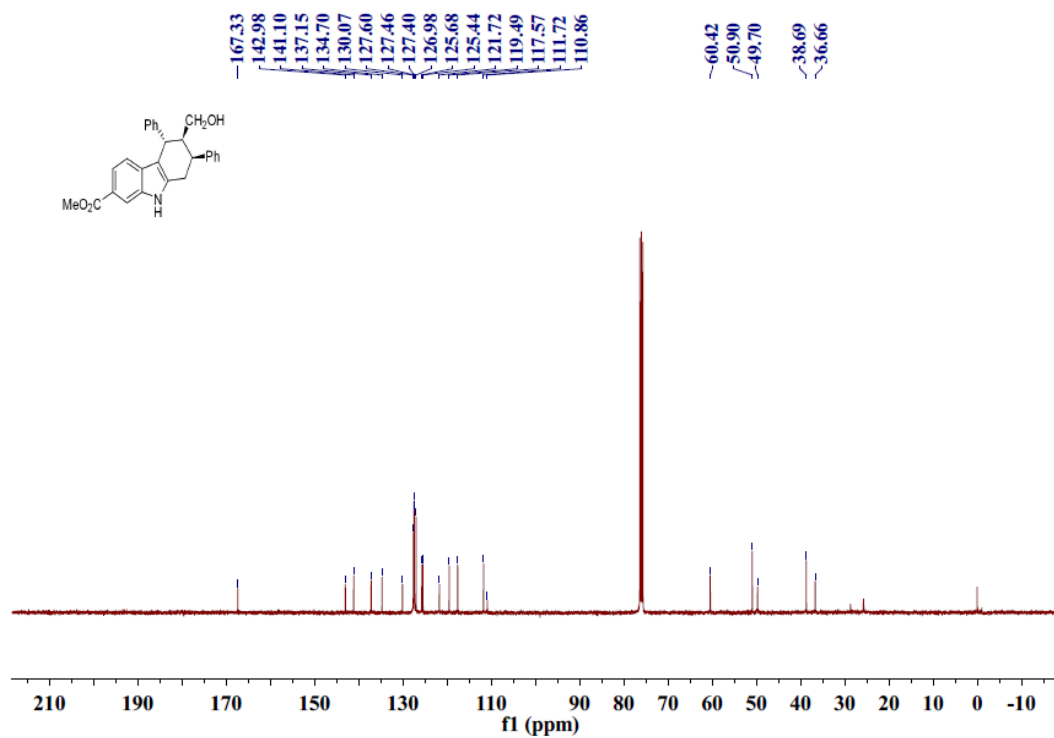

**(6-methyl-2,4-diphenyl-2,3,4,9-tetrahydro-1H-carbazol-3-yl)methanol (4ra)**

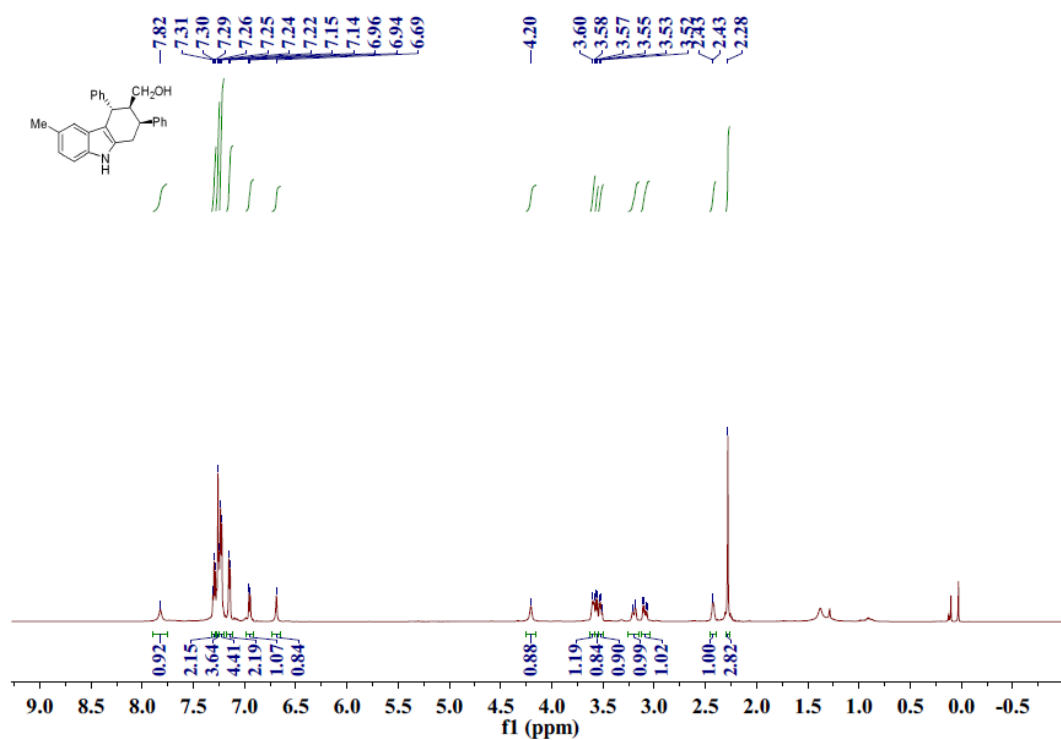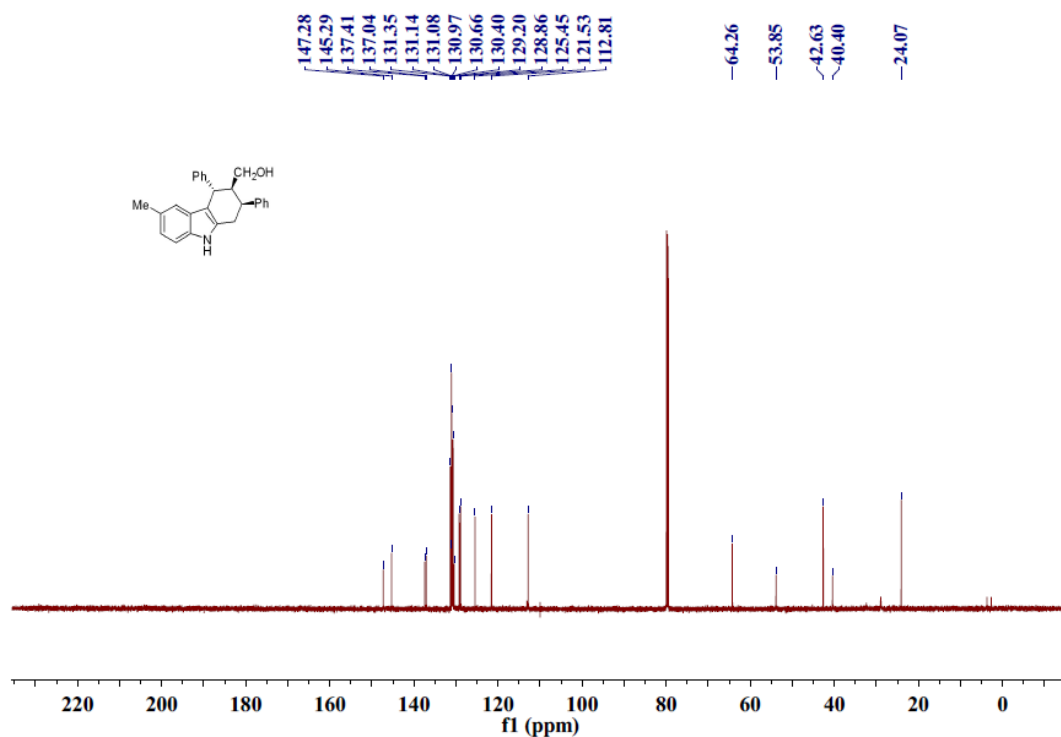

**(6-fluoro-2,4-diphenyl-2,3,4,9-tetrahydro-1H-carbazol-3-yl)methanol (4sa)**

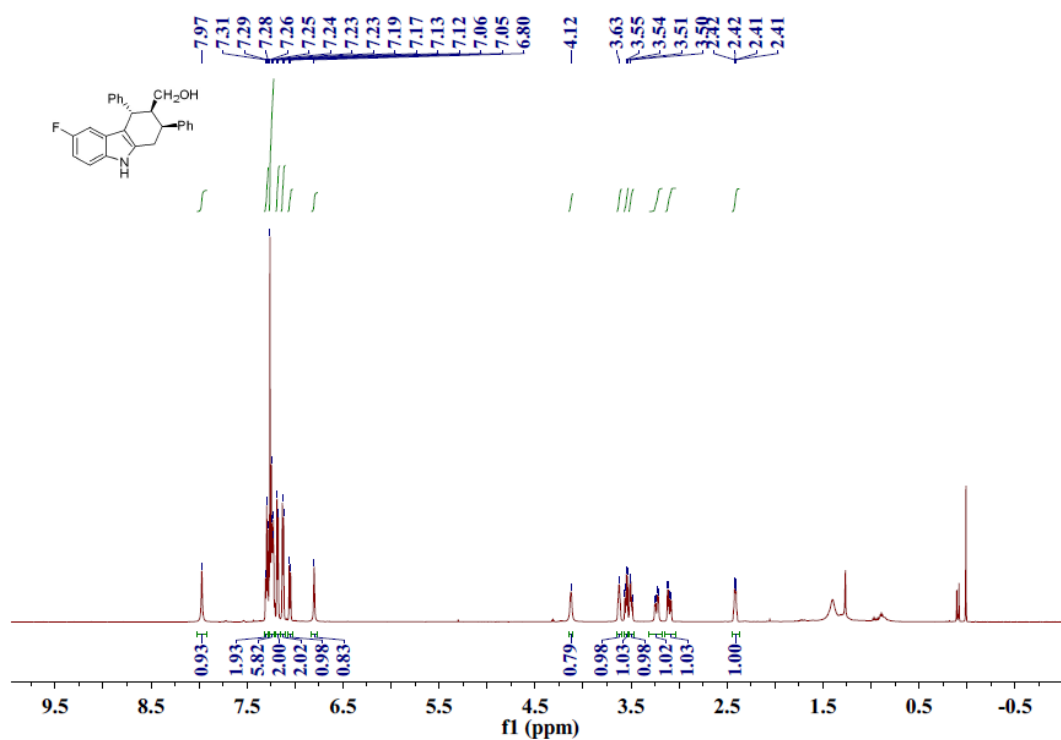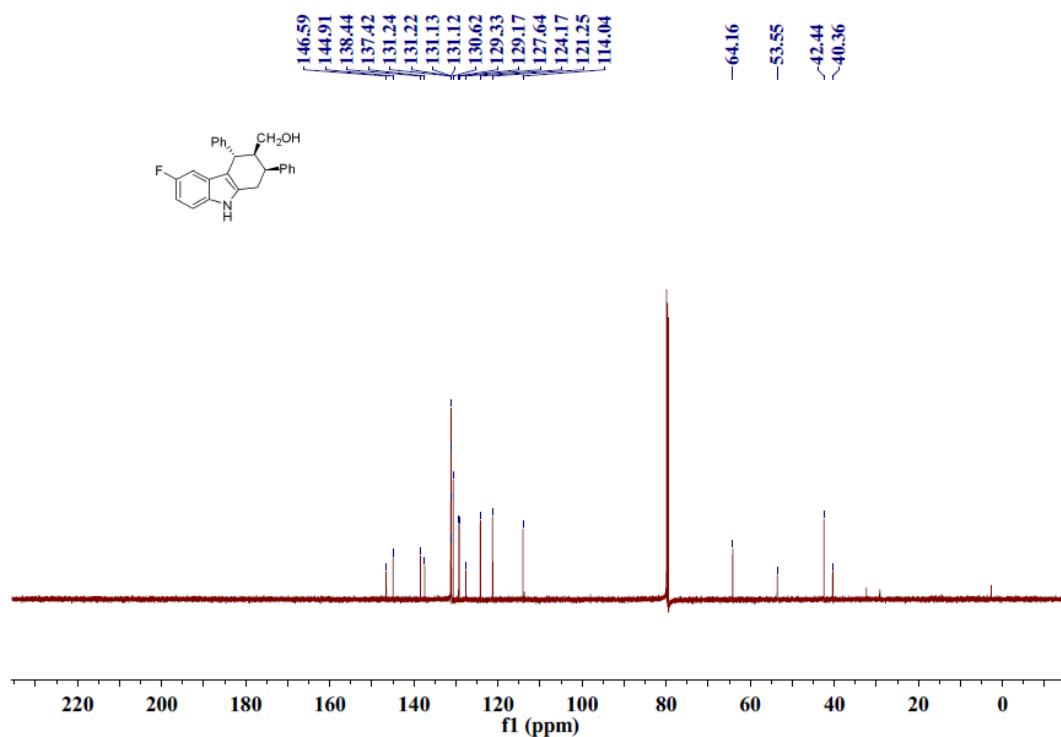

**(6-chloro-2,4-diphenyl-2,3,4,9-tetrahydro-1H-carbazol-3-yl)methanol (4ta)**

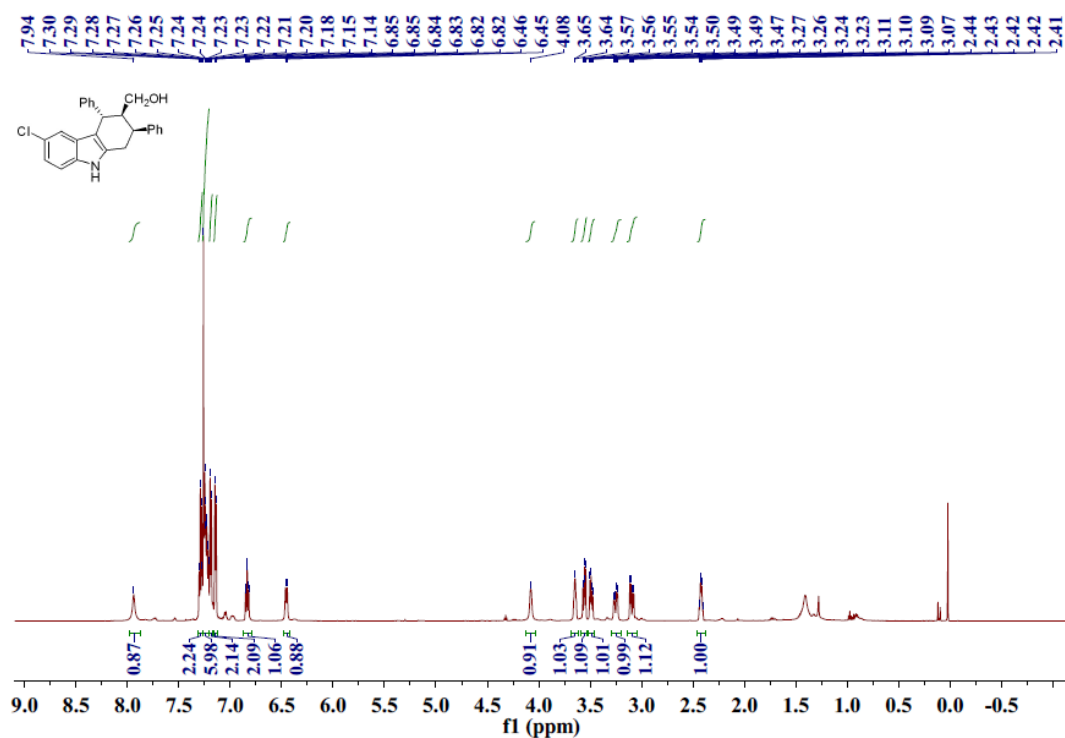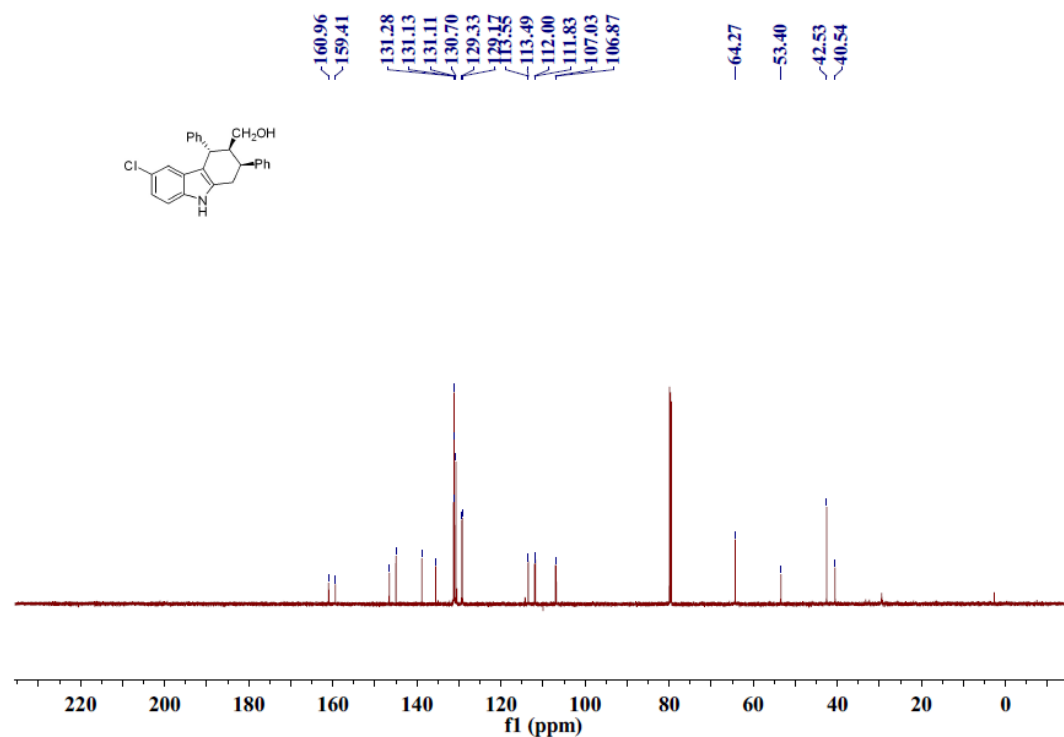

**(6-methoxy-2,4-diphenyl-2,3,4,9-tetrahydro-1H-carbazol-3-yl)methanol (4ua)**

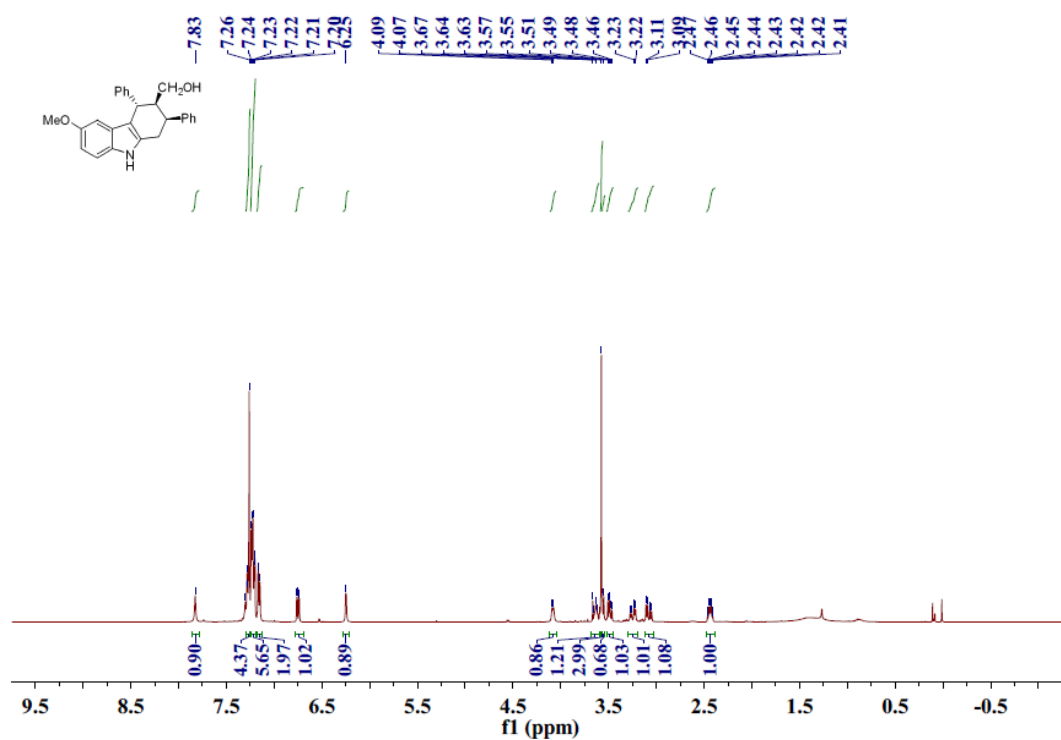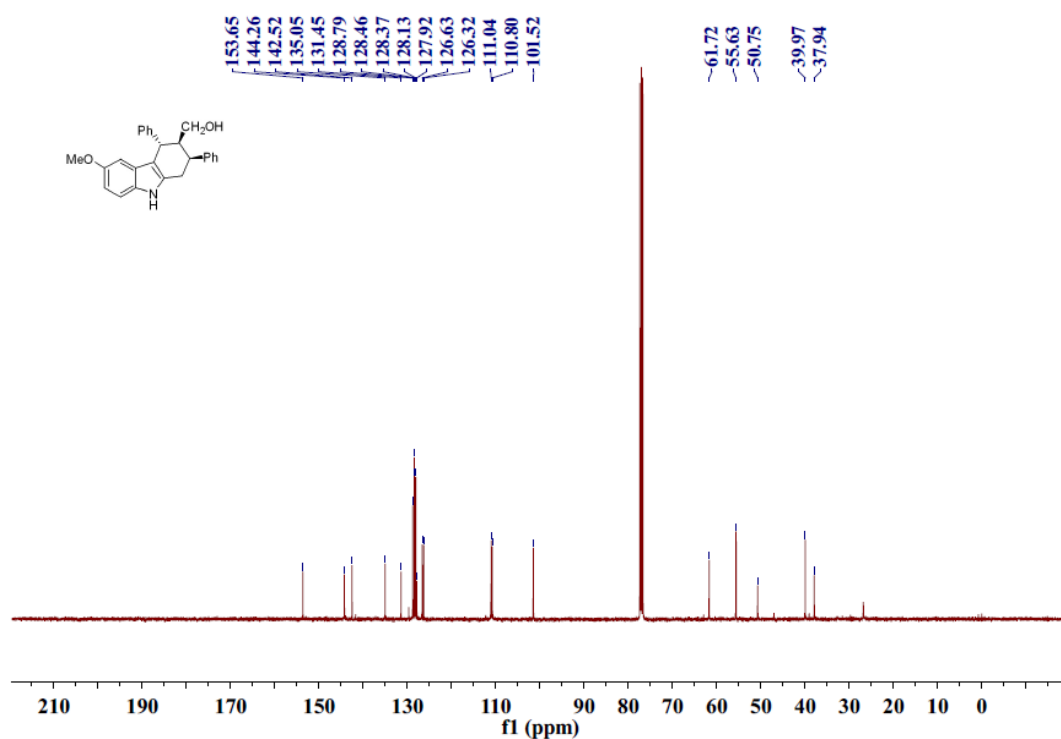

**(4-phenyl-2-(p-tolyl)-2,3,4,9-tetrahydro-1H-carbazol-3-yl)methanol (4ab)**

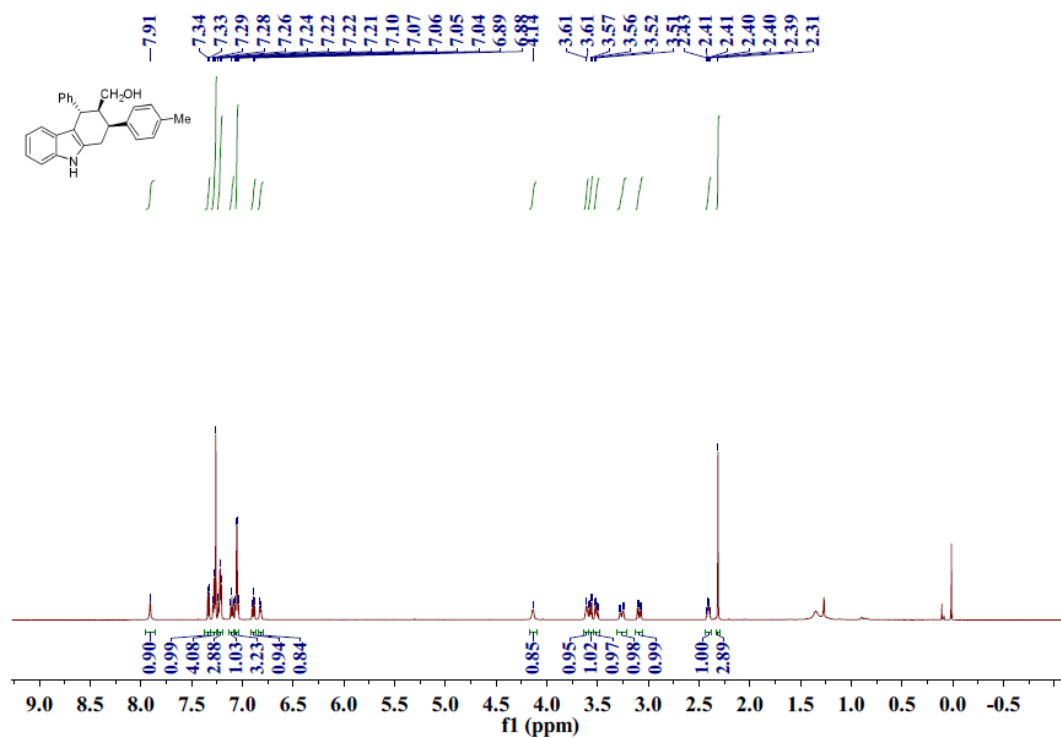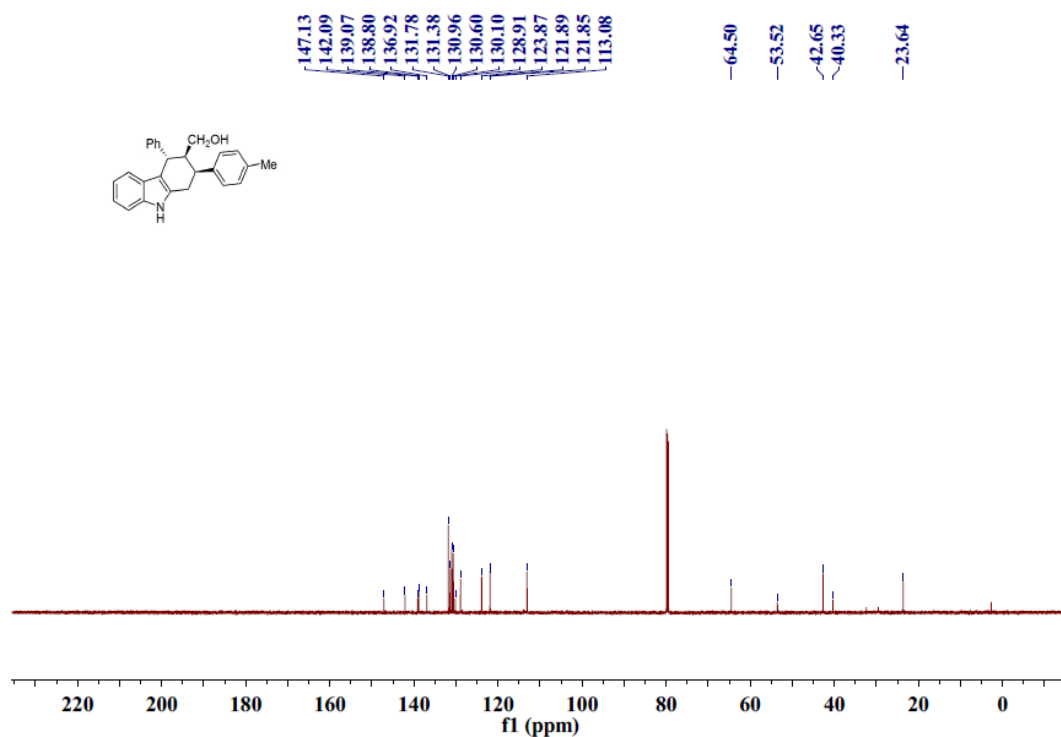

**(2-(4-fluorophenyl)-4-phenyl-2,3,4,9-tetrahydro-1H-carbazol-3-yl)methanol (4ac)**

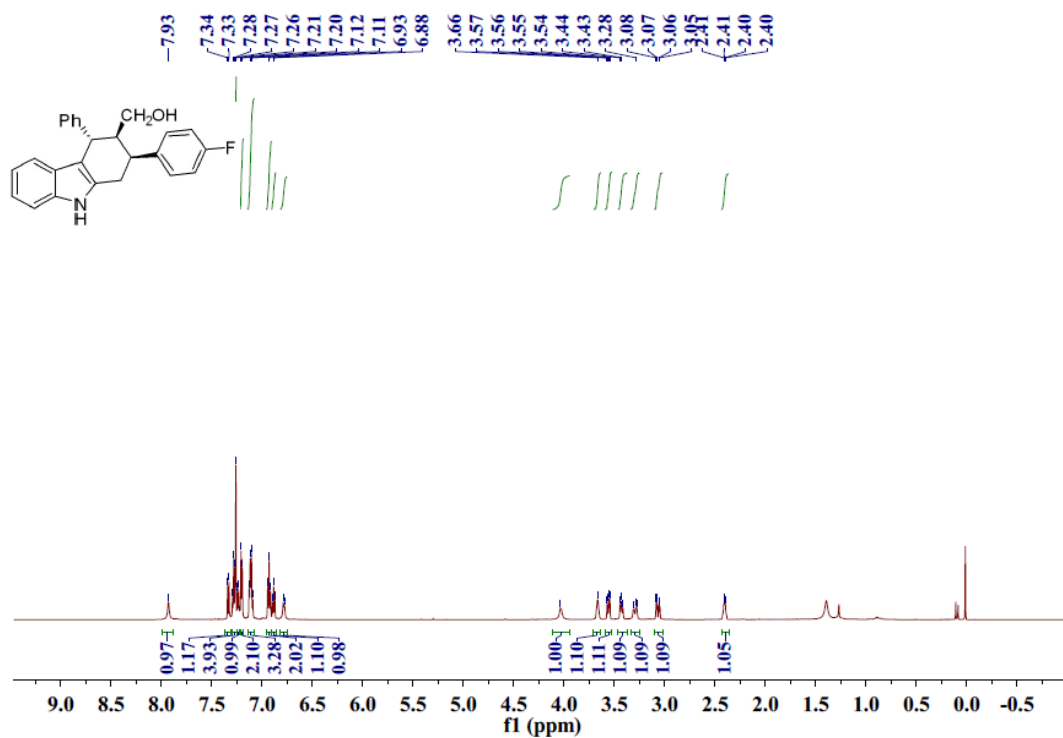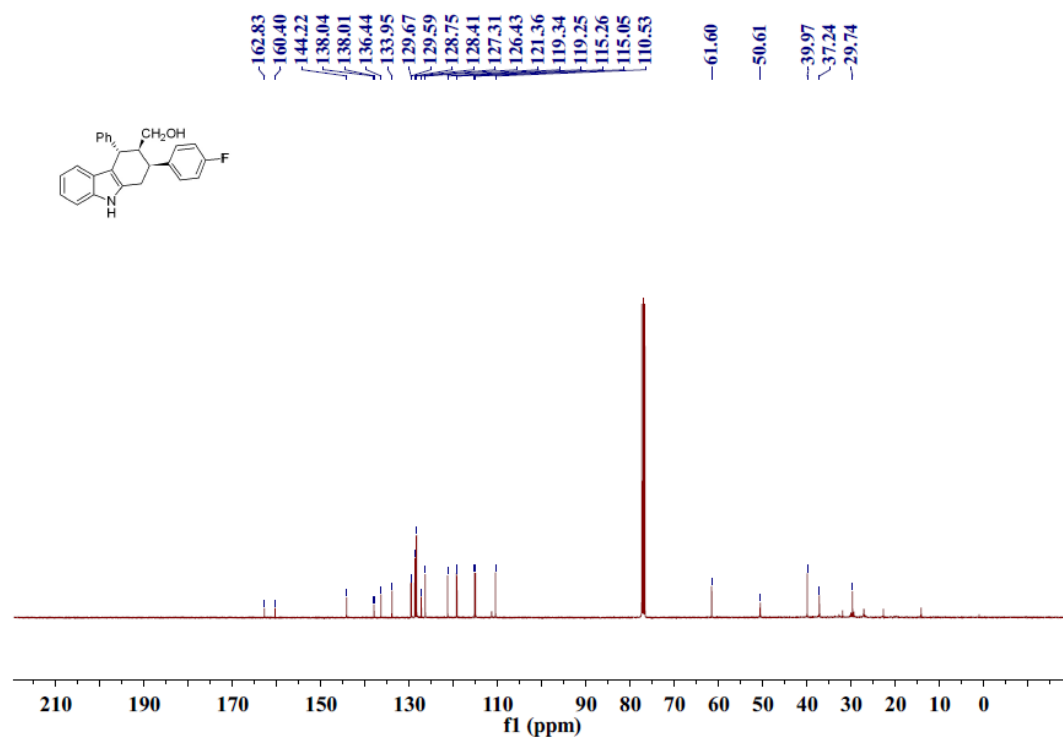



**(2-(4-chlorophenyl)-4-phenyl-2,3,4,9-tetrahydro-1H-carbazol-3-yl)methanol  
(4ad)**

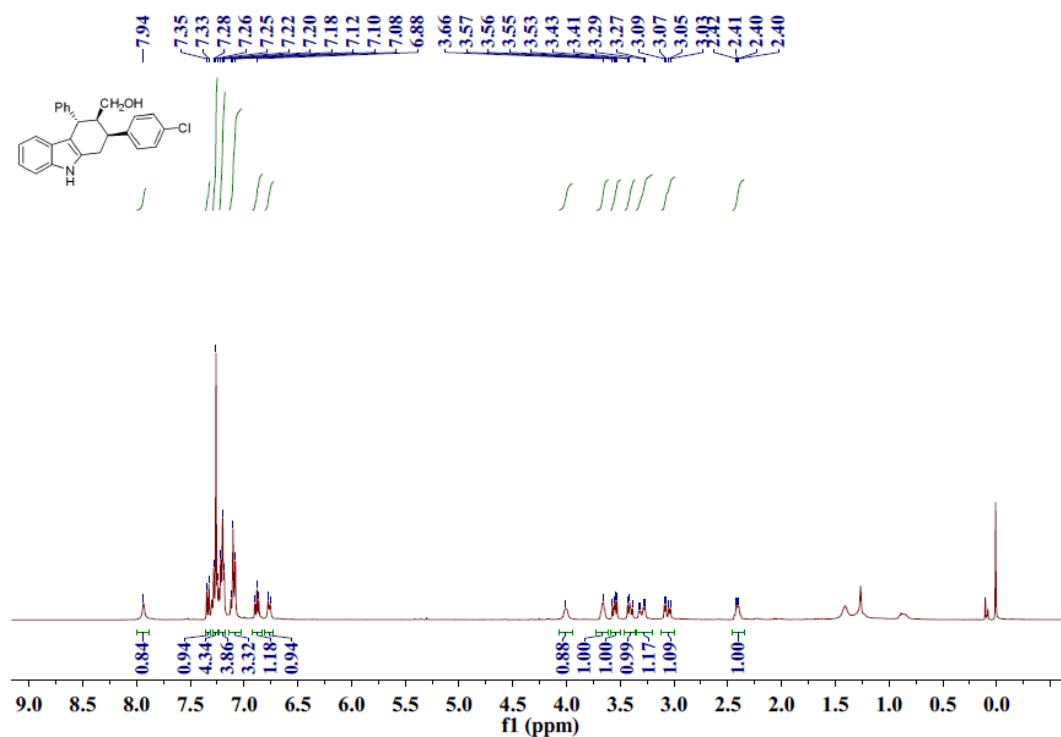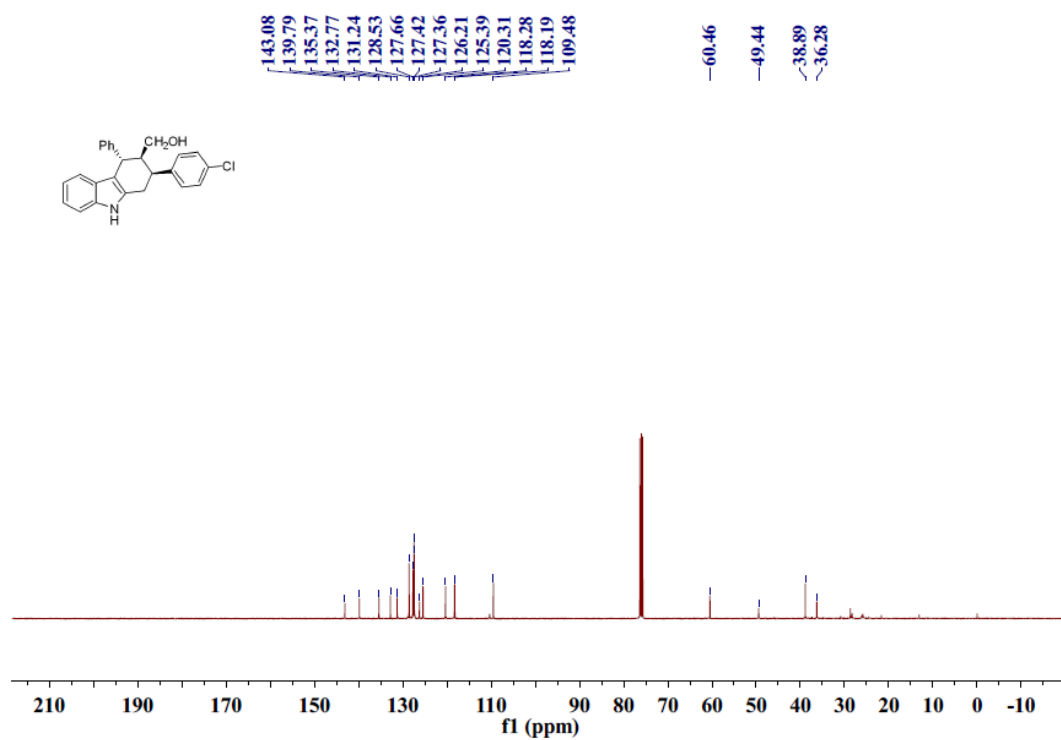

**(2-(4-bromophenyl)-4-phenyl-2,3,4,9-tetrahydro-1H-carbazol-3-yl)methanol**  
**(4ae)**

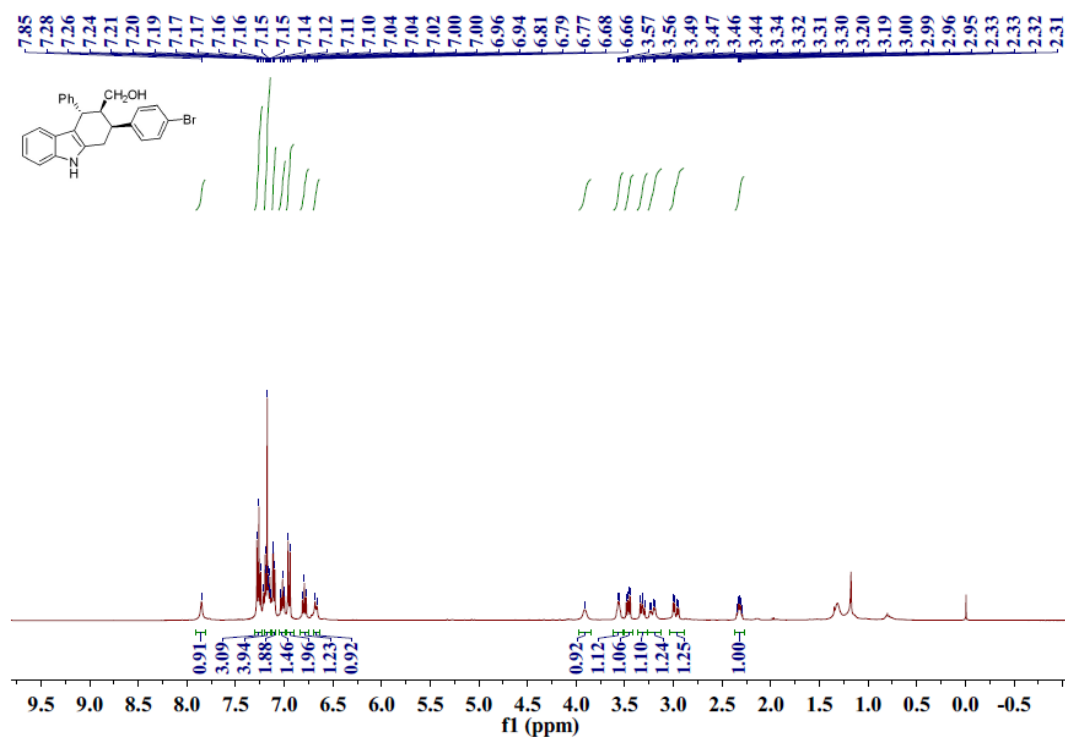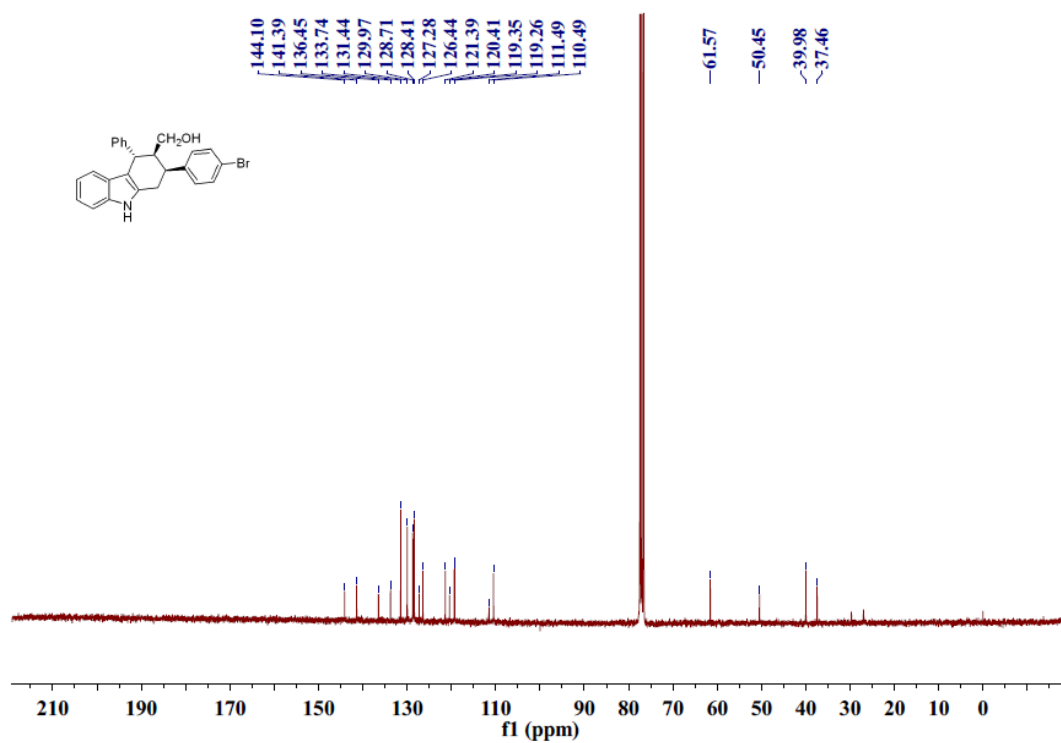

(2-(2-bromophenyl)-4-phenyl-2,3,4,9-tetrahydro-1H-carbazol-3-yl)methanol (4af)

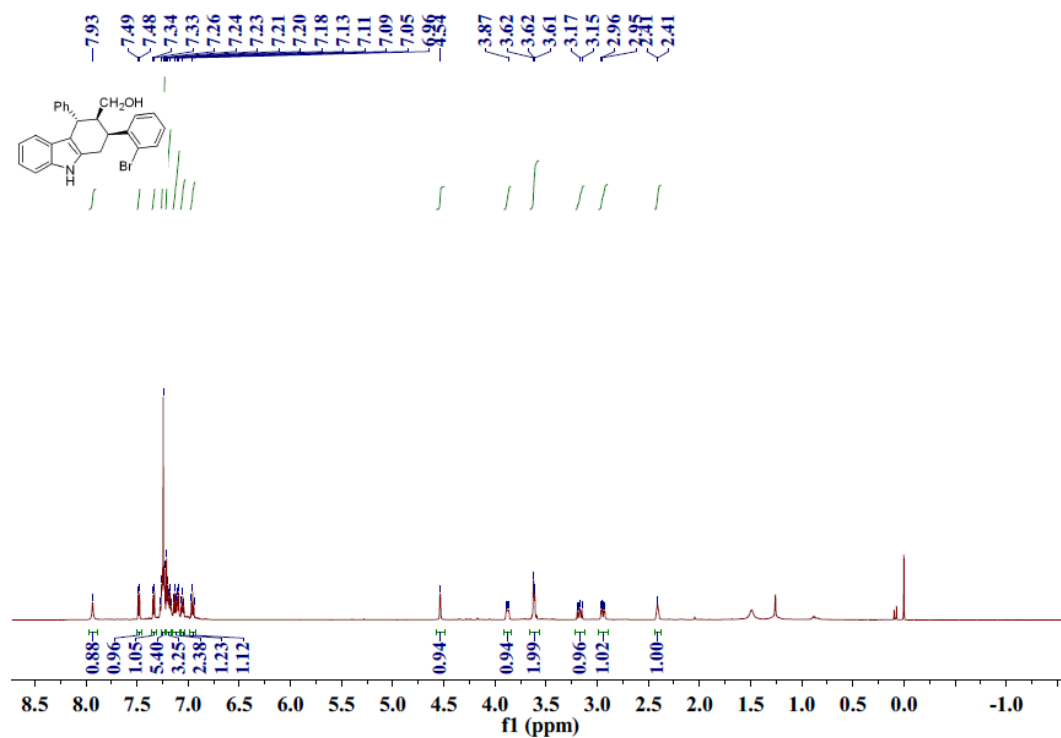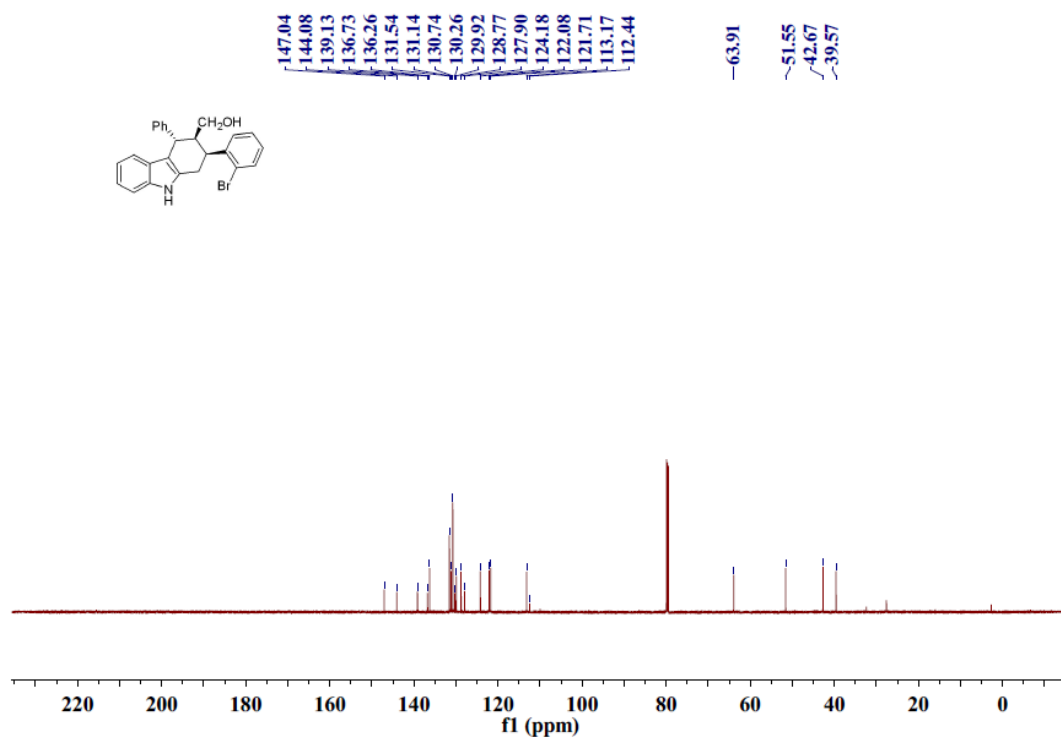

**(4-phenyl-2-(o-tolyl)-2,3,4,9-tetrahydro-1H-carbazol-3-yl)methanol (4ag)**

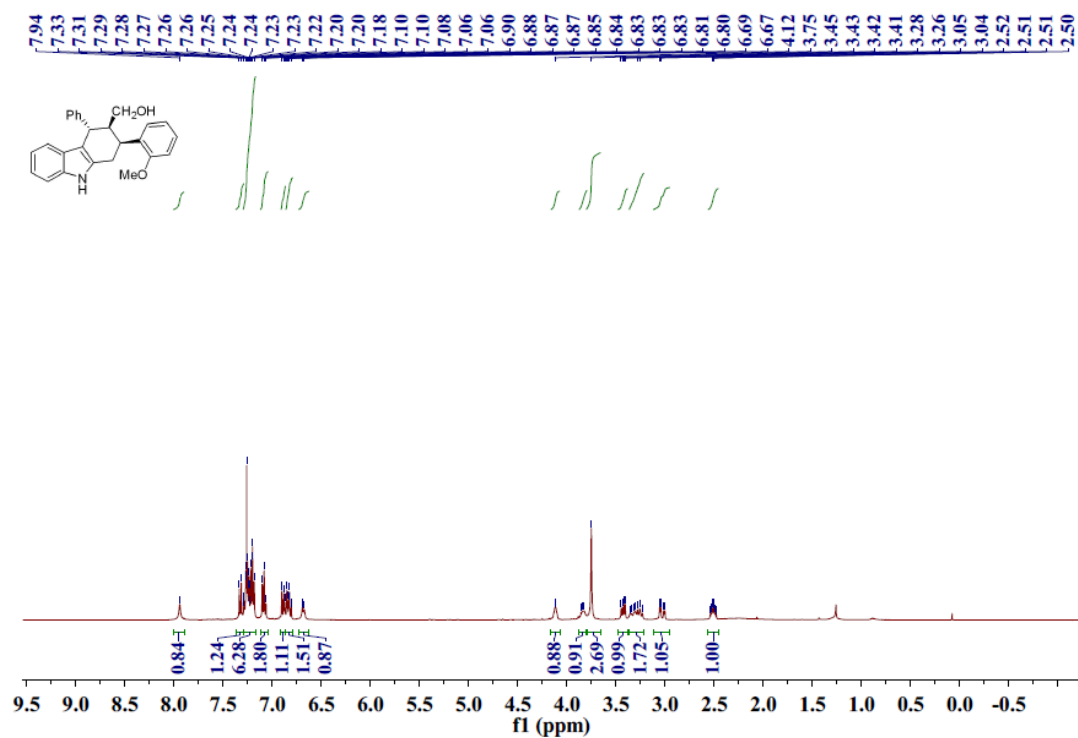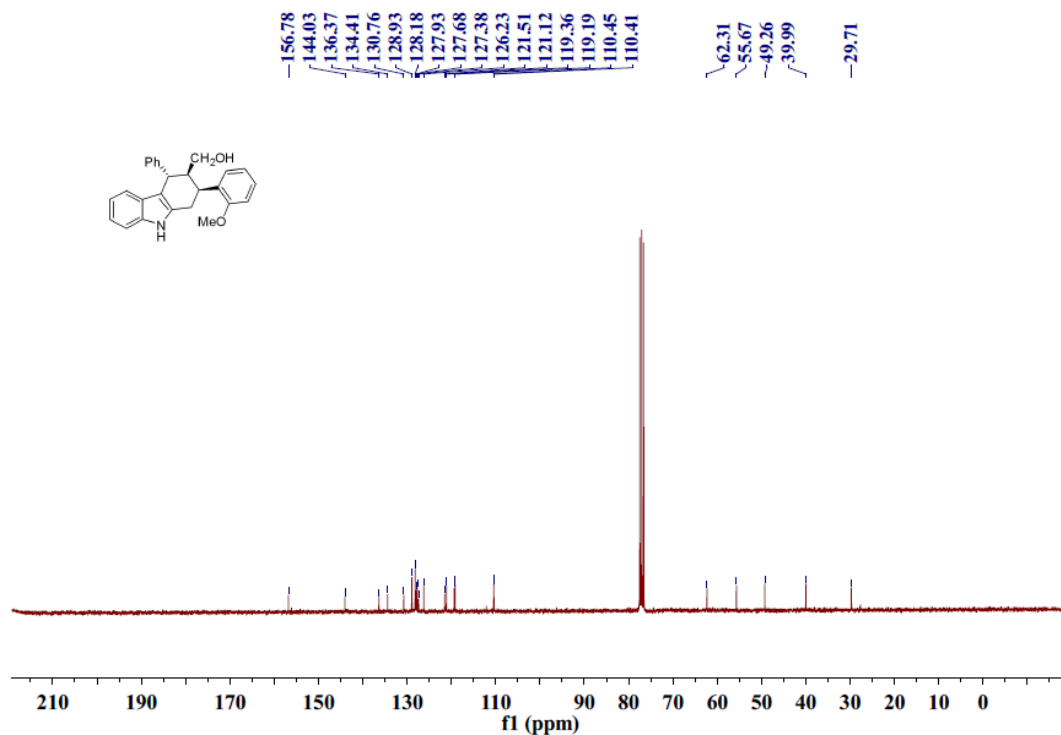

**(2-(naphthalen-1-yl)-4-phenyl-2,3,4,9-tetrahydro-1H-carbazol-3-yl)methanol  
(4ah)**

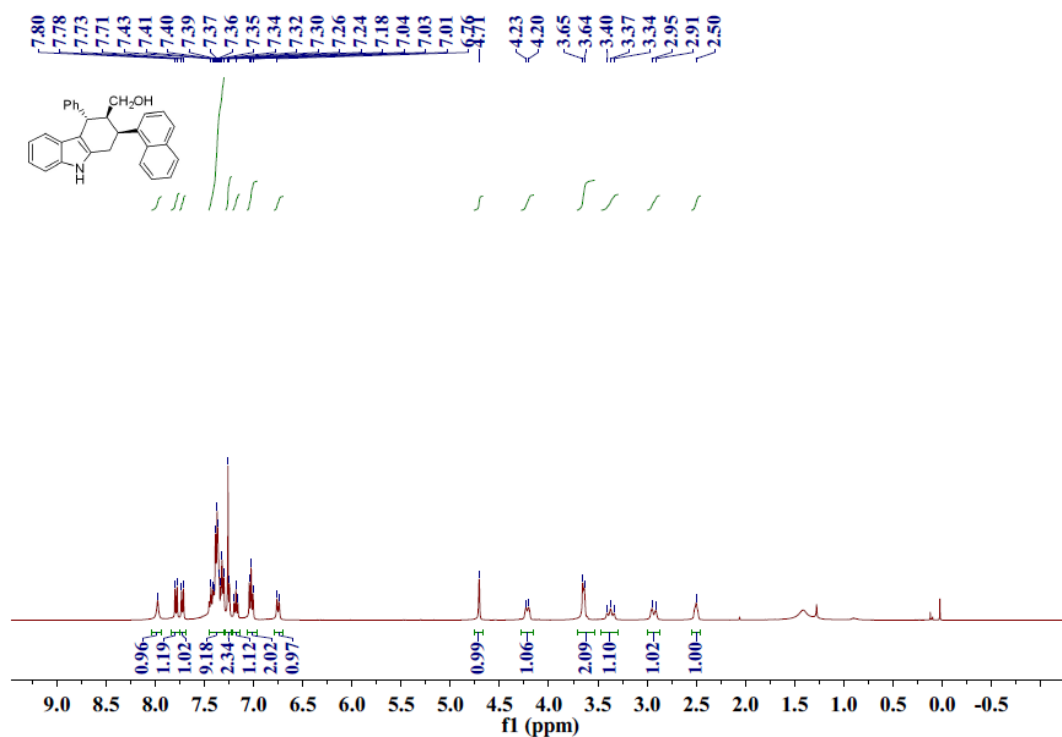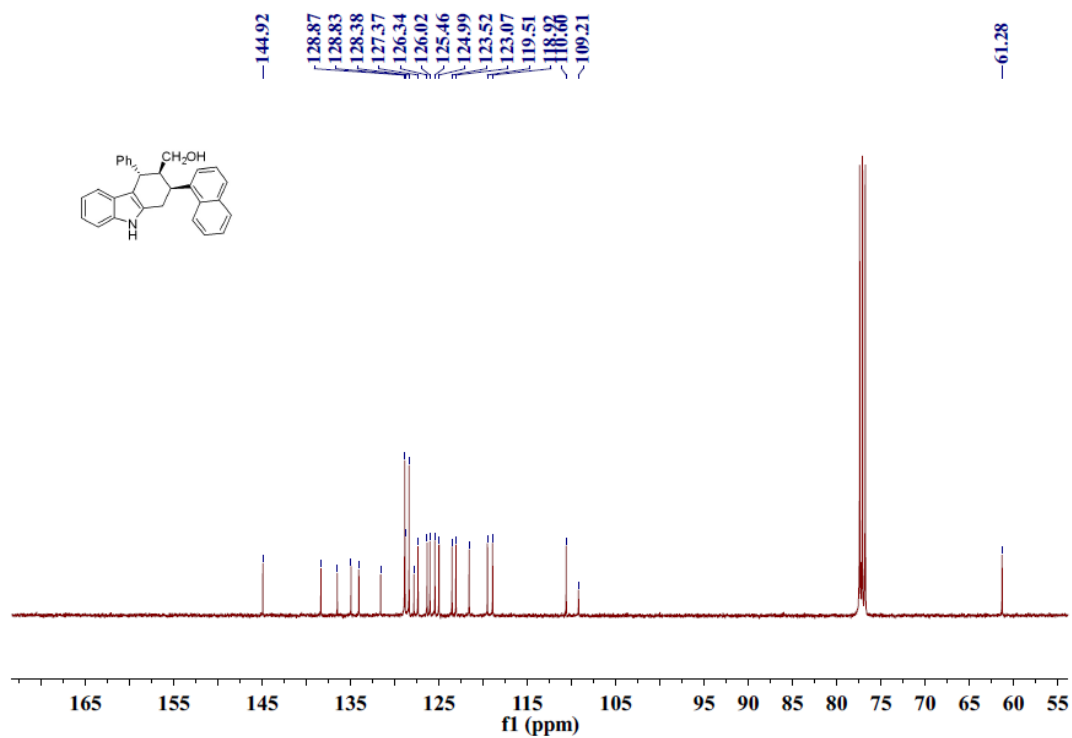

**(4-phenyl-2-(thiophen-3-yl)-2,3,4,9-tetrahydro-1H-carbazol-3-yl)methanol (4ai)**

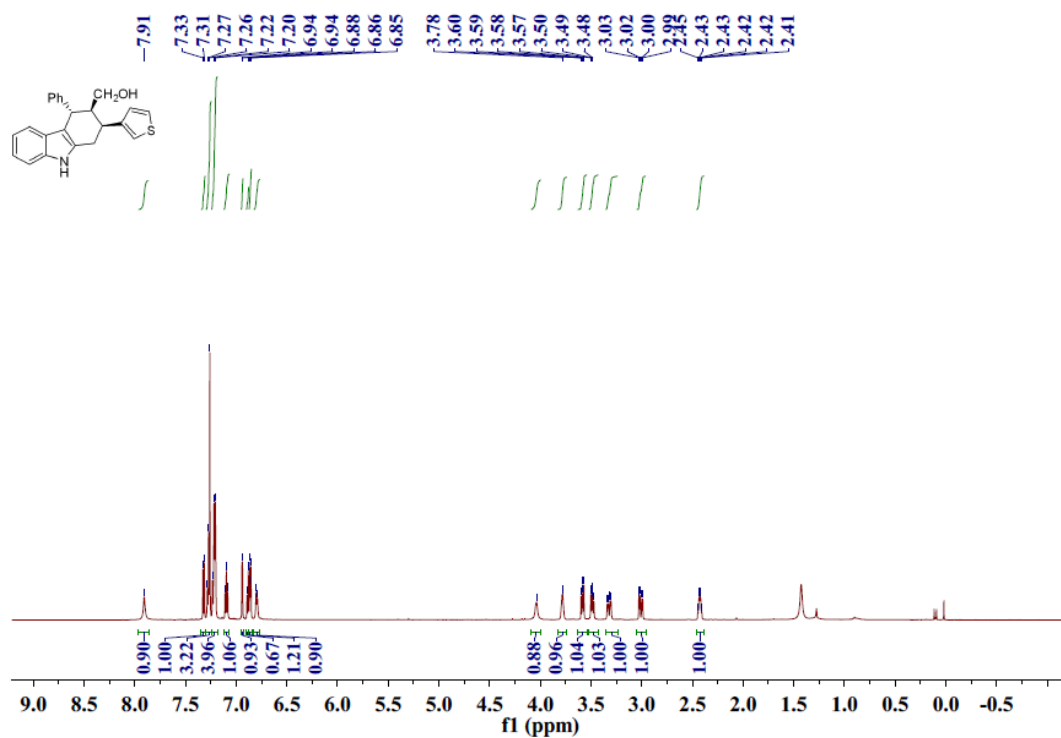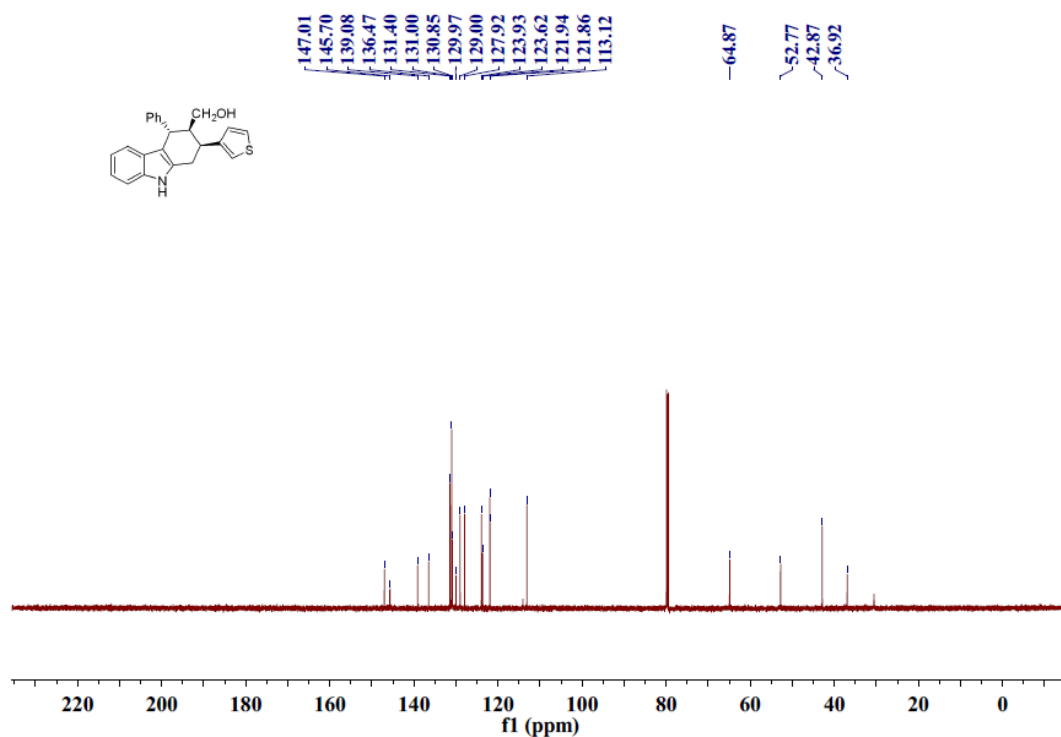

**(4-phenyl-2-(thiophen-2-yl)-2,3,4,9-tetrahydro-1H-carbazol-3-yl)methanol (4aj)**

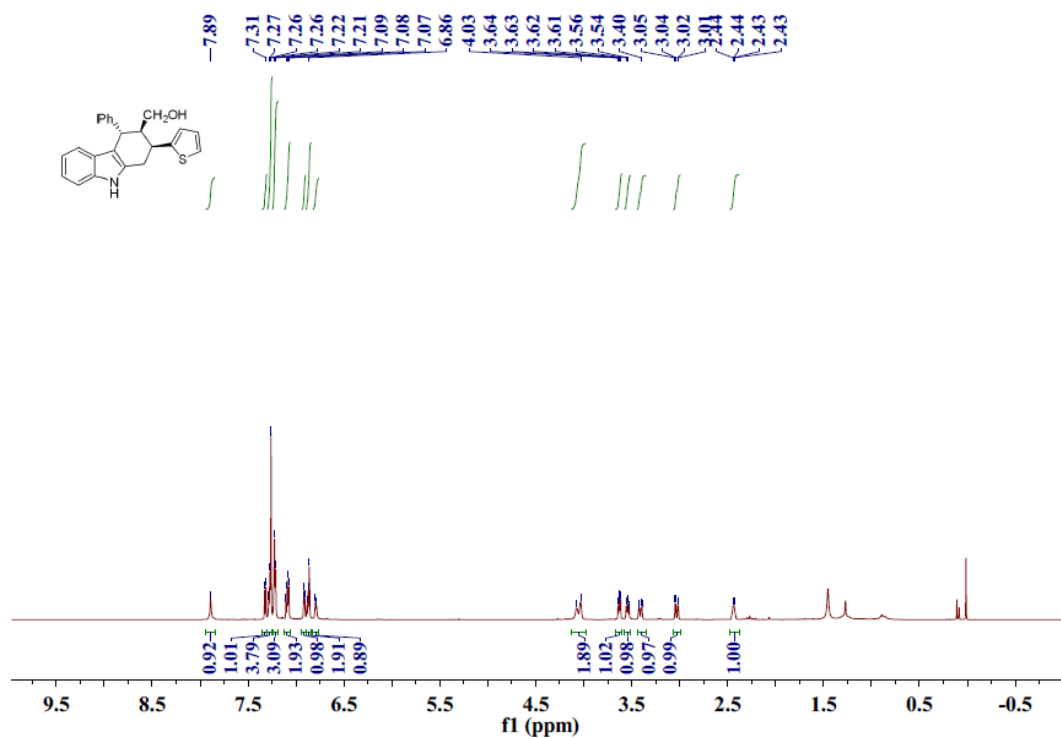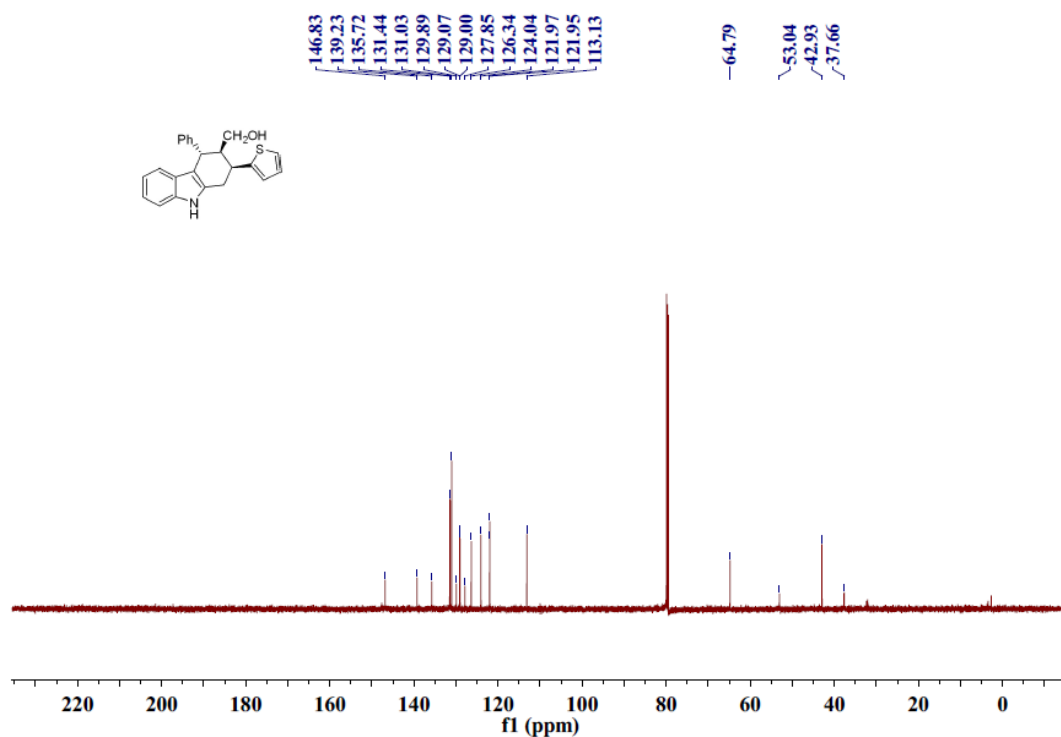

**(2-(furan-2-yl)-4-phenyl-2,3,4,9-tetrahydro-1H-carbazol-3-yl)methanol (4ak)**

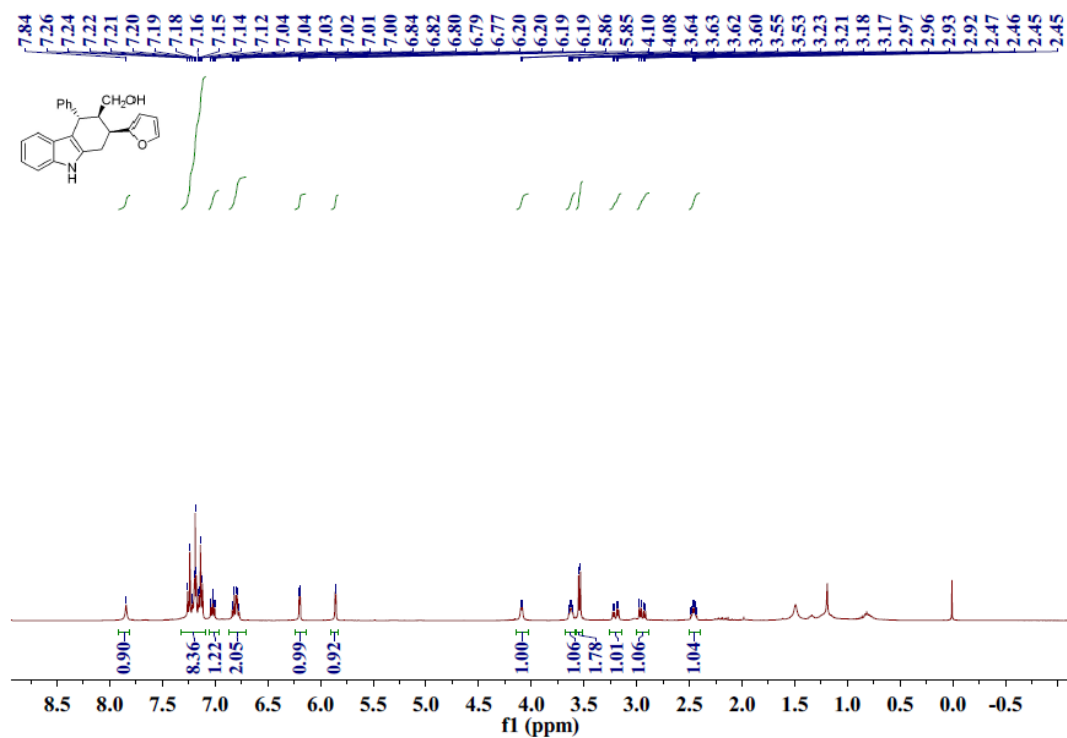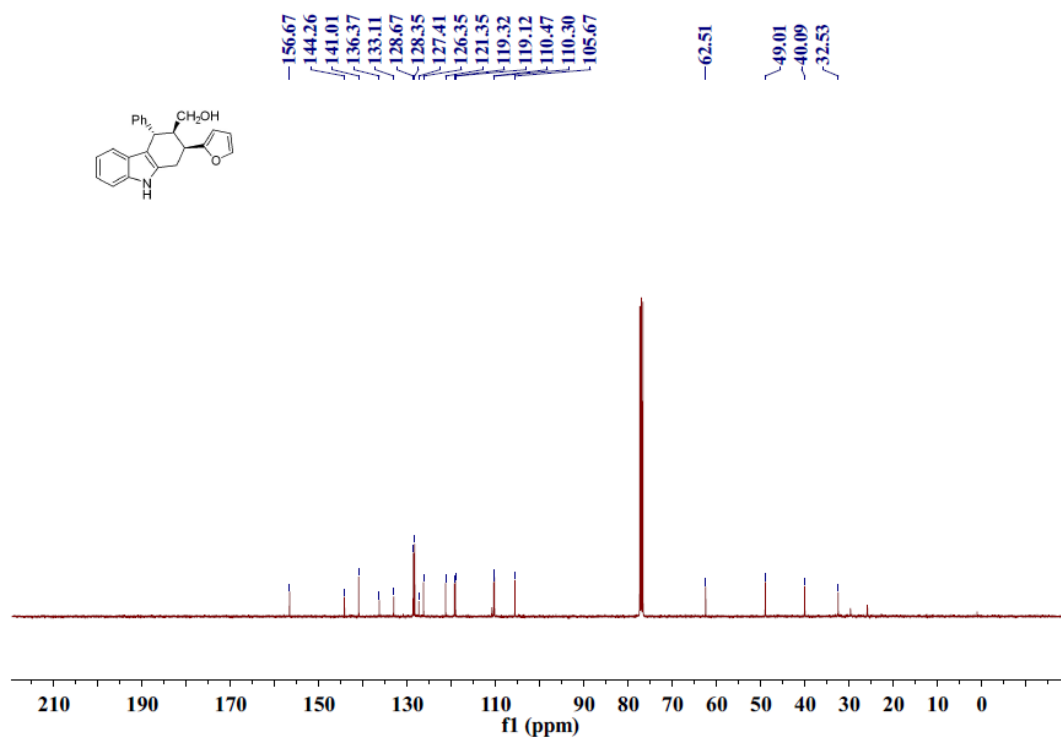



**methyl(E)-3-(2,4-diphenyl-2,3,4,9-tetrahydro-1H-carbazol-3-yl)acrylate (D1)**

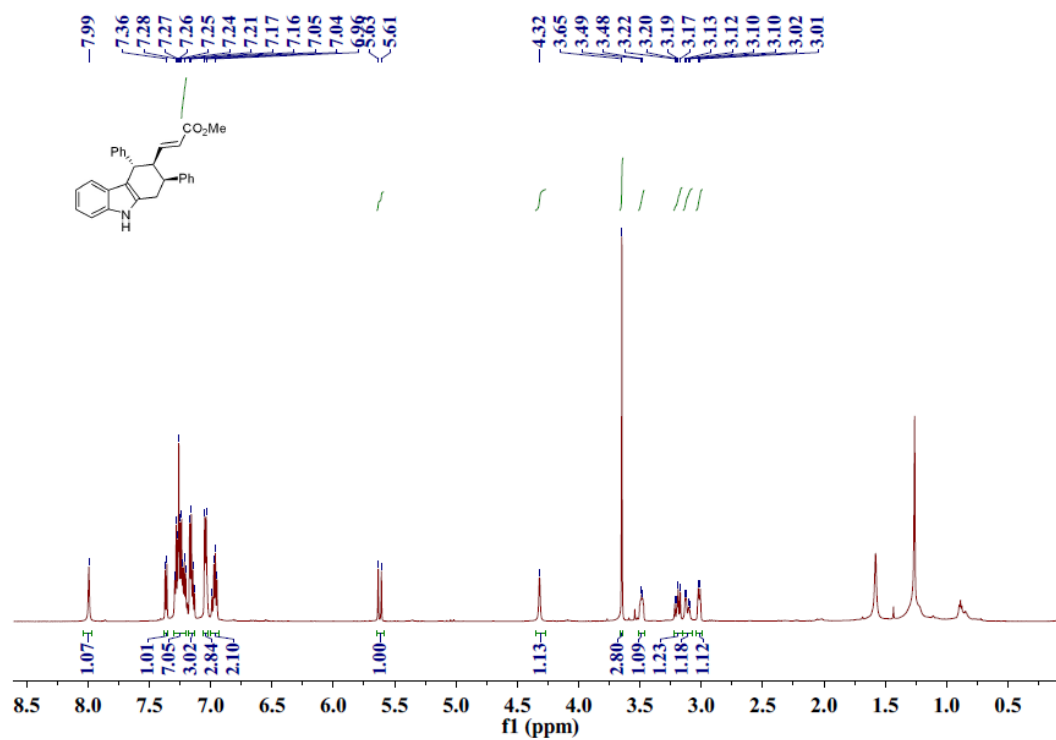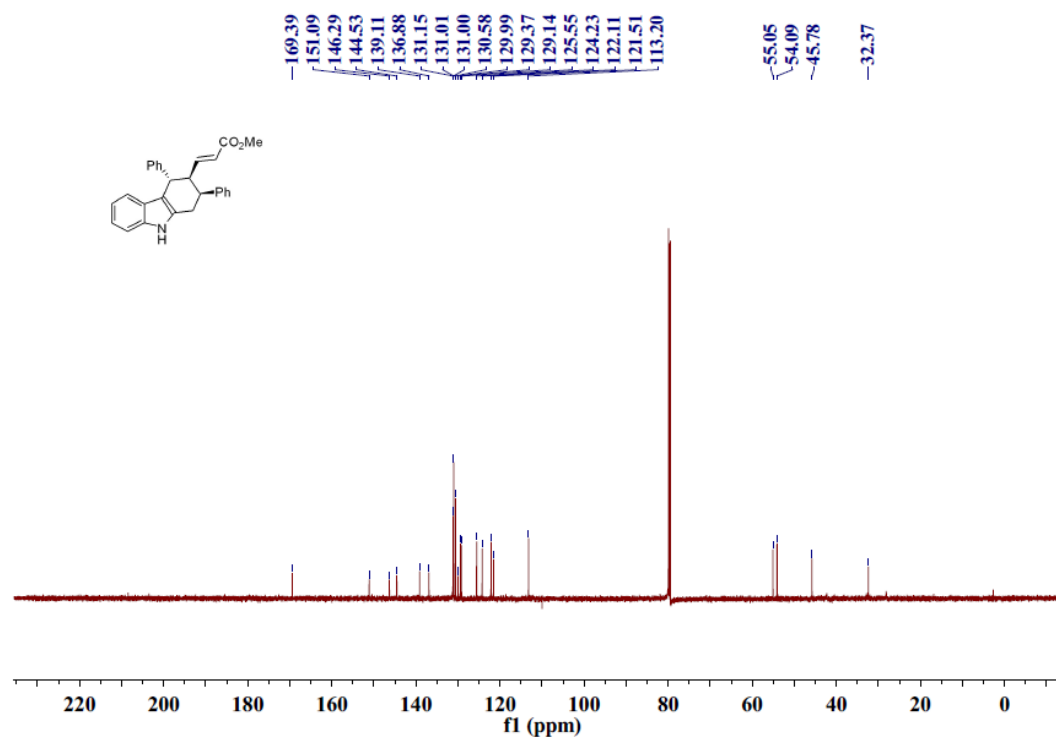

**(2,4-diphenyl-2,3,4,9-tetrahydro-1H-carbazol-3-yl)methyl 4-bromobenzoate (D2)**

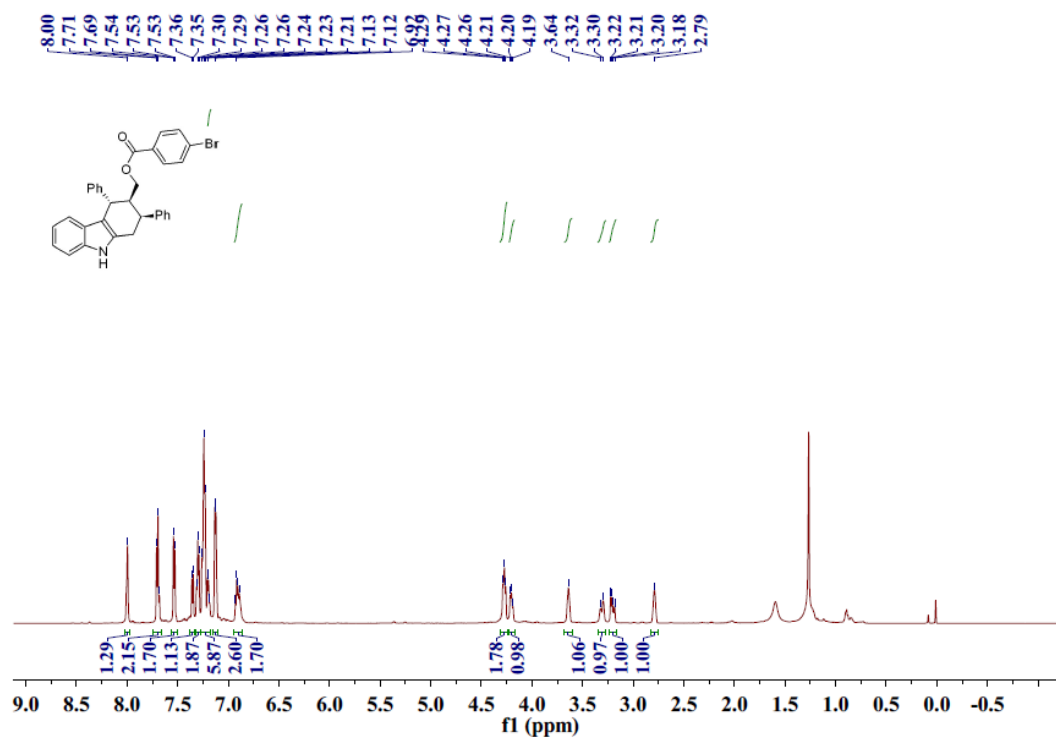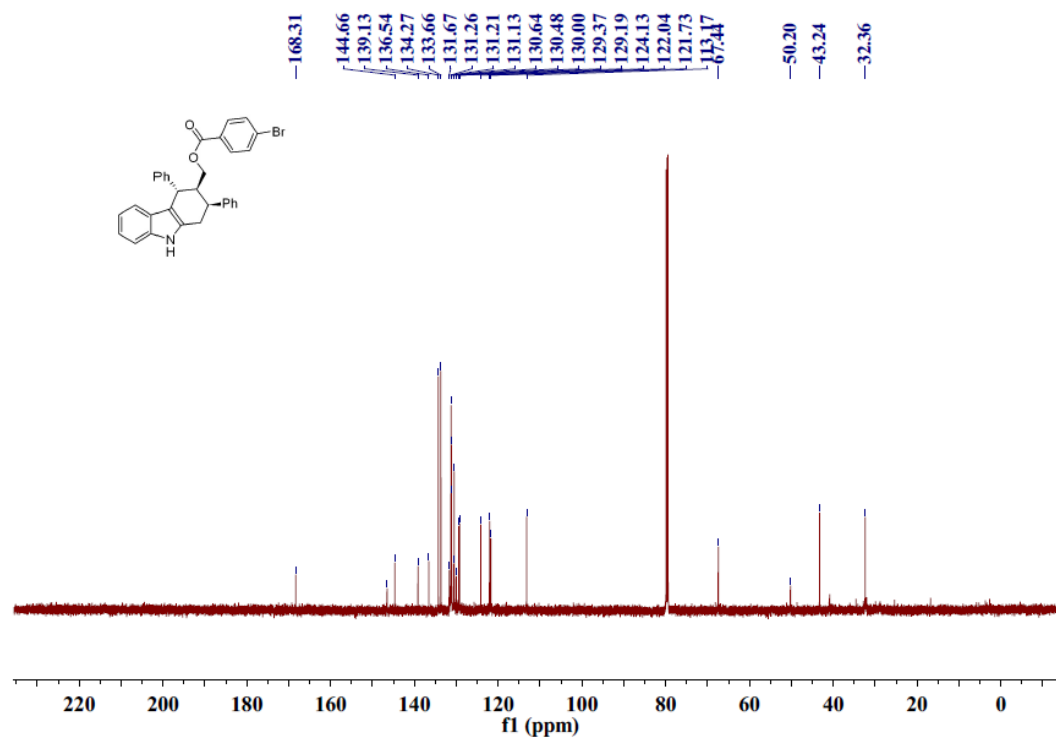

## 9. HPLC Analysis for Pruduct.

### ((2S,3S,4S)-2,4-diphenyl-2,3,4,9-tetrahydro-1H-carbazol-3-yl)methanol (4aa)

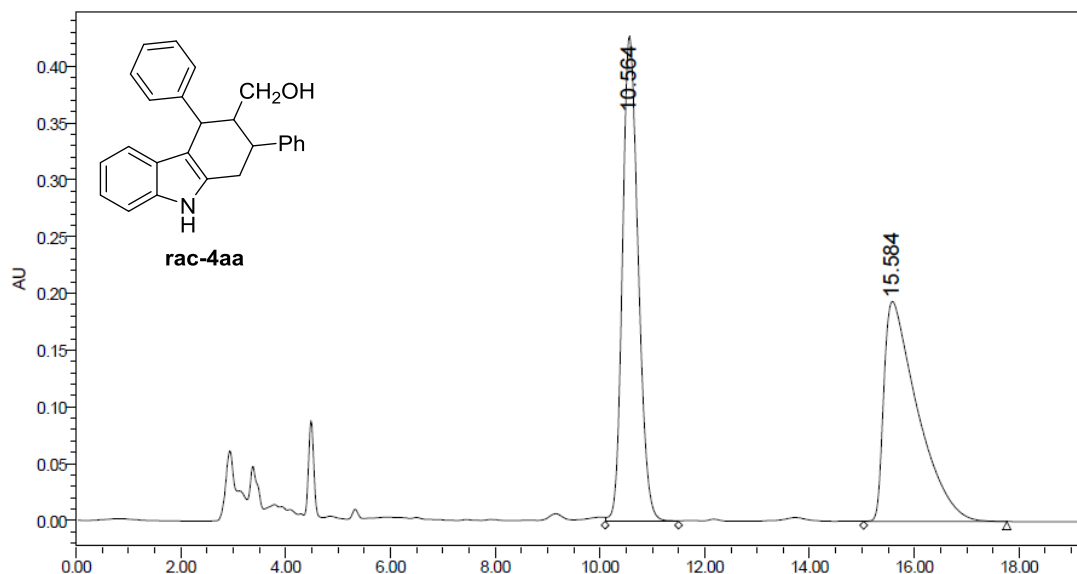

|   | RT<br>(min) | Peak<br>Type | Area<br>(礦*sec) | % Area | Height<br>(礦) | % Height | Integration<br>Type | Points<br>Across Peak | Start<br>Time<br>(min) | End<br>Time<br>(min) |
|---|-------------|--------------|-----------------|--------|---------------|----------|---------------------|-----------------------|------------------------|----------------------|
| 1 | 10.564      | 未知           | 8872180         | 50.66  | 427186        | 68.80    | VV                  | 84                    | 10.100                 | 11.500               |
| 2 | 15.584      | 未知           | 8639950         | 49.34  | 193719        | 31.20    | VB                  | 164                   | 15.033                 | 17.767               |

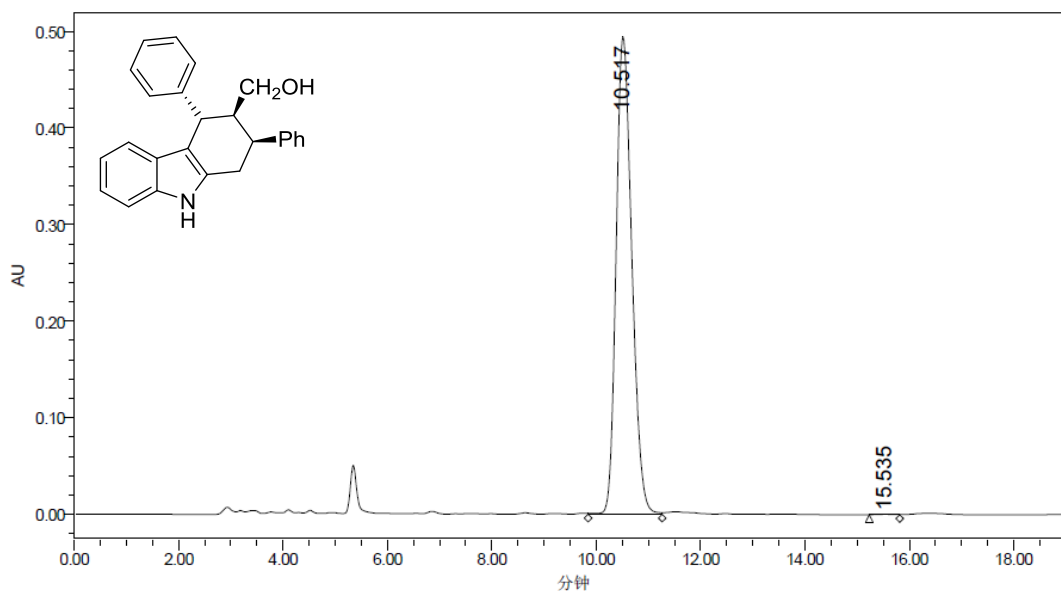

|   | RT<br>(min) | Peak<br>Type | Area<br>(礦*sec) | % Area | Height<br>(礦) | % Height | Integration<br>Type | Points<br>Across Peak | Start<br>Time<br>(min) | End<br>Time<br>(min) |
|---|-------------|--------------|-----------------|--------|---------------|----------|---------------------|-----------------------|------------------------|----------------------|
| 1 | 10.517      | 未知           | 10353779        | 99.93  | 494511        | 99.92    | VV                  | 85                    | 9.850                  | 11.267               |
| 2 | 15.535      | 未知           | 7247            | 0.07   | 393           | 0.08     | BV                  | 35                    | 15.233                 | 15.817               |

**((2S,3S,4S)-2-phenyl-4-(o-tolyl)-2,3,4,9-tetrahydro-1H-carbazol-3-yl)methanol  
(4ba)**

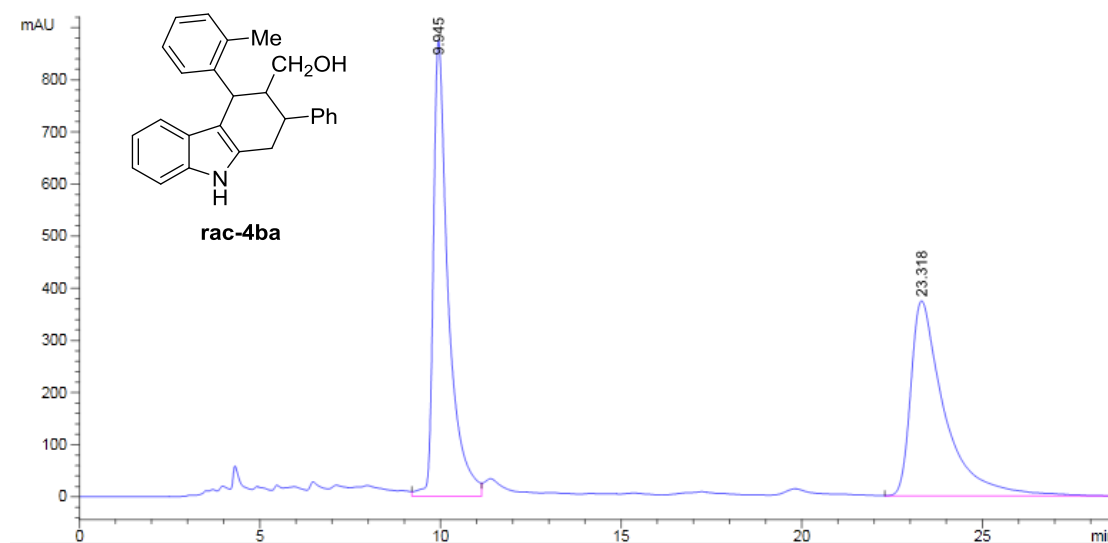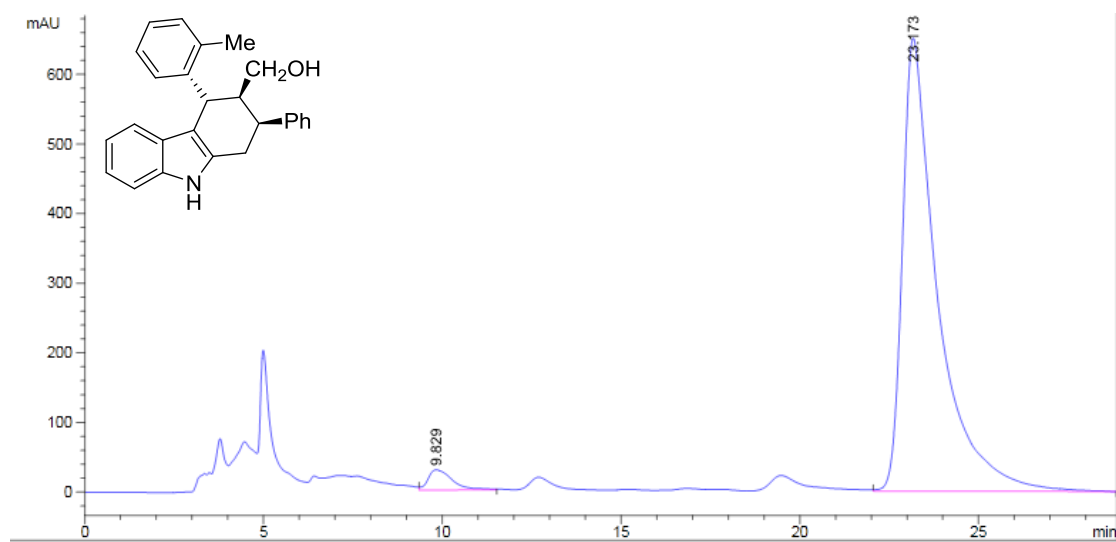

**((2S,3S,4S)-2-phenyl-4-(m-tolyl)-2,3,4,9-tetrahydro-1H-carbazol-3-yl)methanol  
(4ca)**

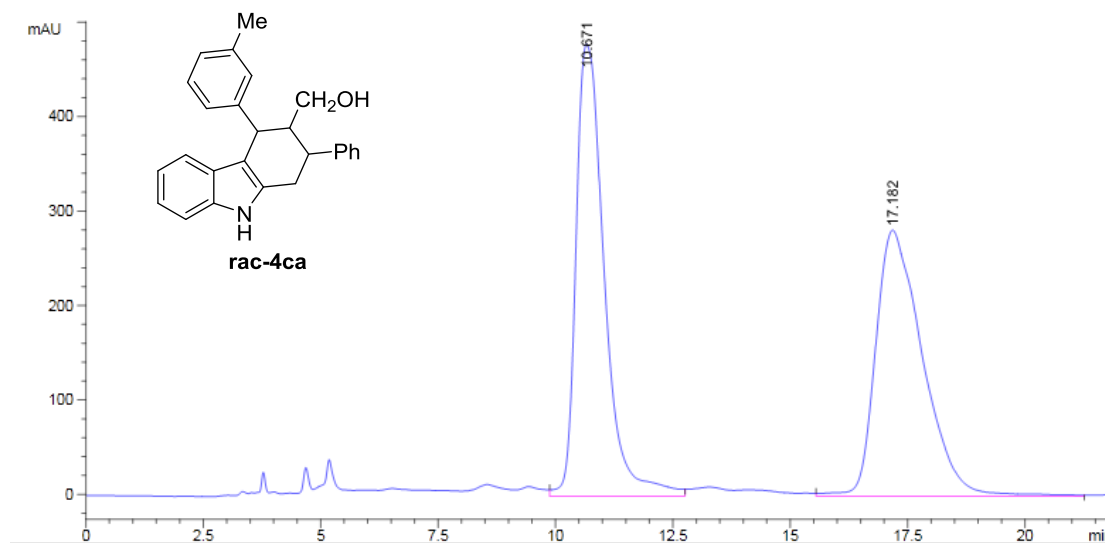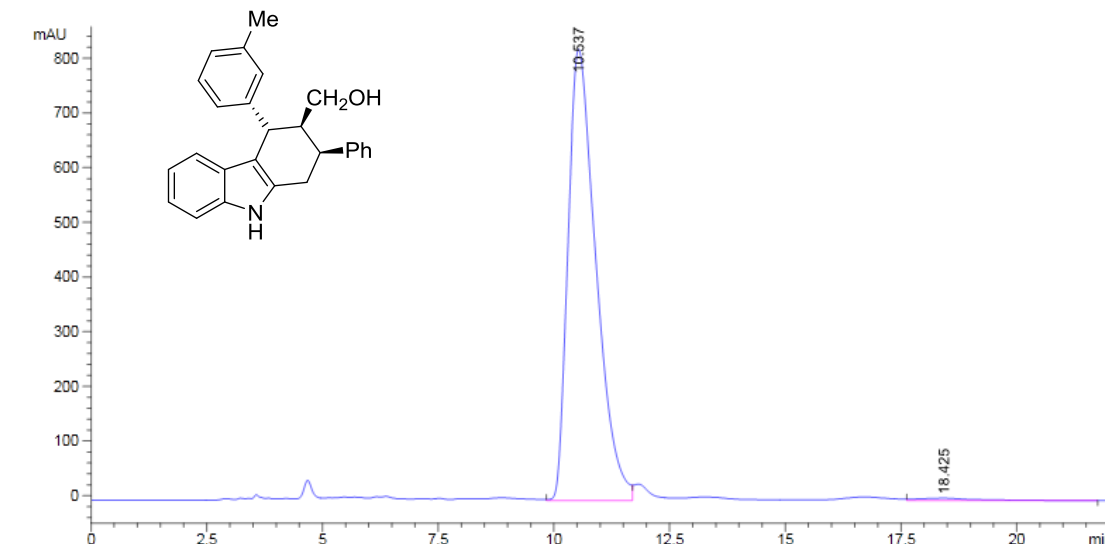

**((2S,3S,4S)-2-phenyl-4-(p-tolyl)-2,3,4,9-tetrahydro-1H-carbazol-3-yl)methanol  
(4da)**

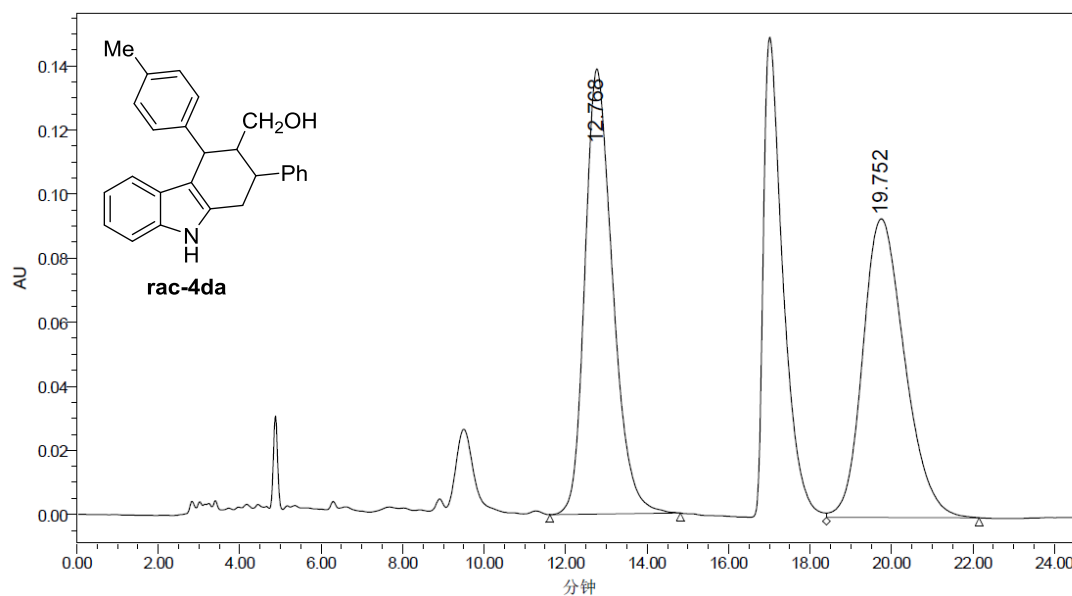

|   | RT<br>(min) | Peak<br>Type | Area<br>(AU*sec) | % Area | Height<br>(AU) | % Height | Integration<br>Type | Points<br>Across Peak | Start<br>Time<br>(min) | End<br>Time<br>(min) |
|---|-------------|--------------|------------------|--------|----------------|----------|---------------------|-----------------------|------------------------|----------------------|
| 1 | 12.768      | 未知           | 6576967          | 49.68  | 139008         | 59.84    | BB                  | 192                   | 11.617                 | 14.817               |
| 2 | 19.752      | 未知           | 6660789          | 50.32  | 93272          | 40.16    | VB                  | 225                   | 18.400                 | 22.150               |

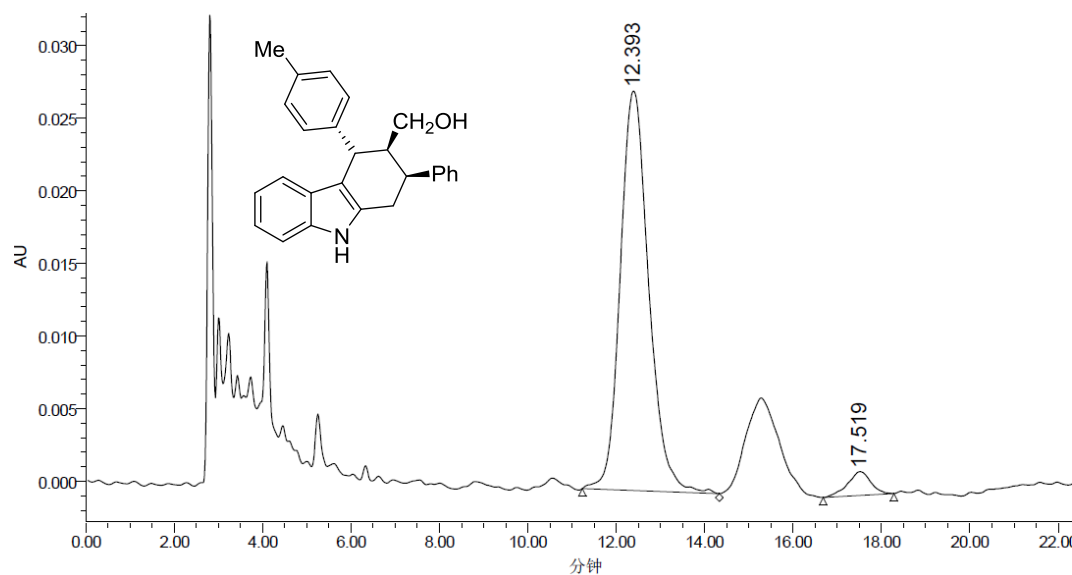

|   | RT<br>(min) | Peak<br>Type | Area<br>(AU*sec) | % Area | Height<br>(AU) | % Height | Integration<br>Type | Points<br>Across Peak | Start<br>Time<br>(min) | End<br>Time<br>(min) |
|---|-------------|--------------|------------------|--------|----------------|----------|---------------------|-----------------------|------------------------|----------------------|
| 1 | 12.393      | 未知           | 1231655          | 95.38  | 27506          | 94.40    | BV                  | 186                   | 11.233                 | 14.333               |
| 2 | 17.519      | 未知           | 59650            | 4.62   | 1633           | 5.60     | BB                  | 96                    | 16.683                 | 18.283               |

**((2S,3S,4R)-4-(3-chlorophenyl)-2-phenyl-2,3,4,9-tetrahydro-1H-carbazol-3-yl)methanol (4ea)**

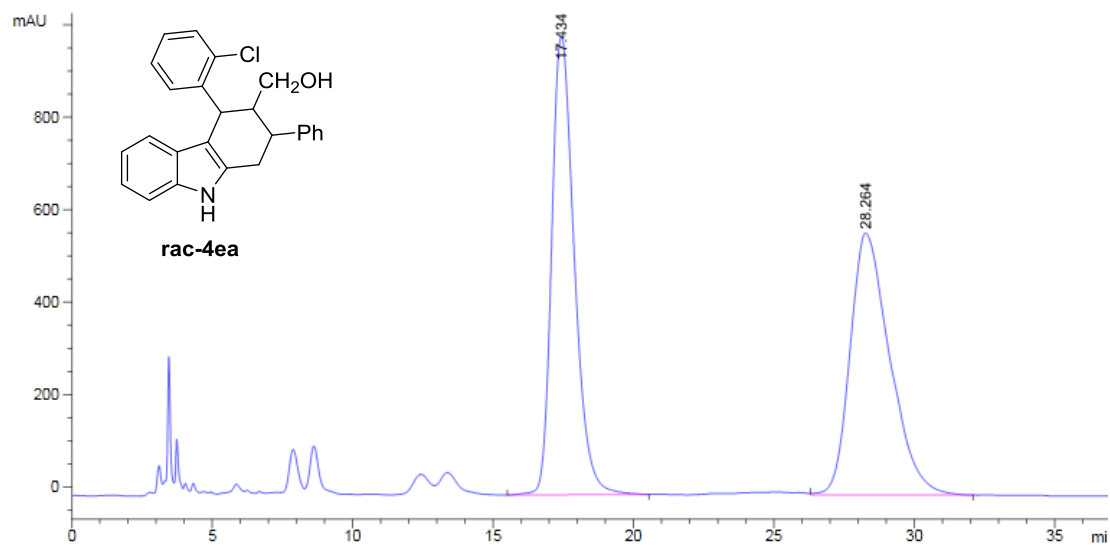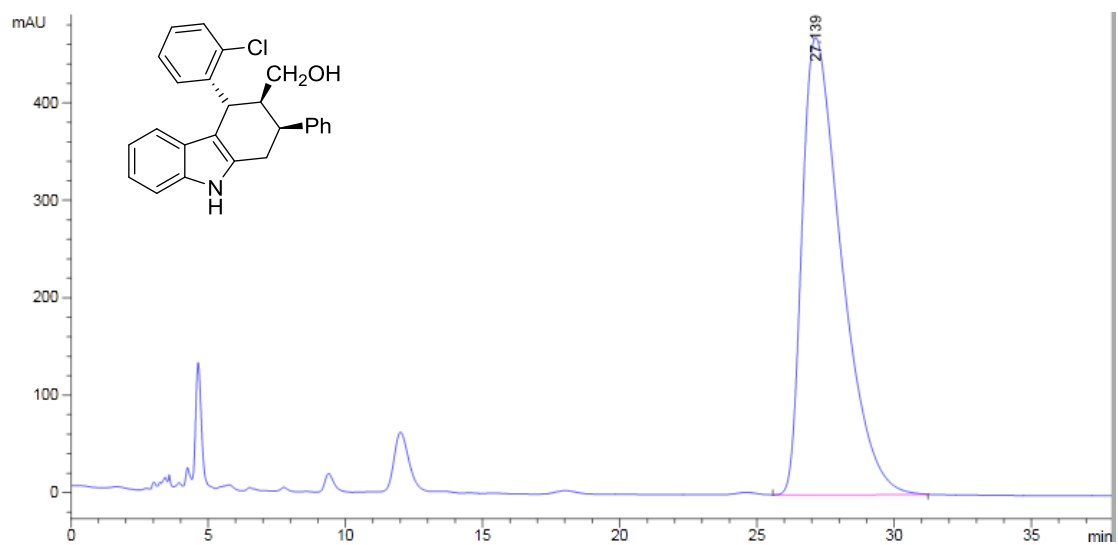

**((2S,3S,4S)-4-(3-chlorophenyl)-2-phenyl-2,3,4,9-tetrahydro-1H-carbazol-3-yl)methanol (4fa)**

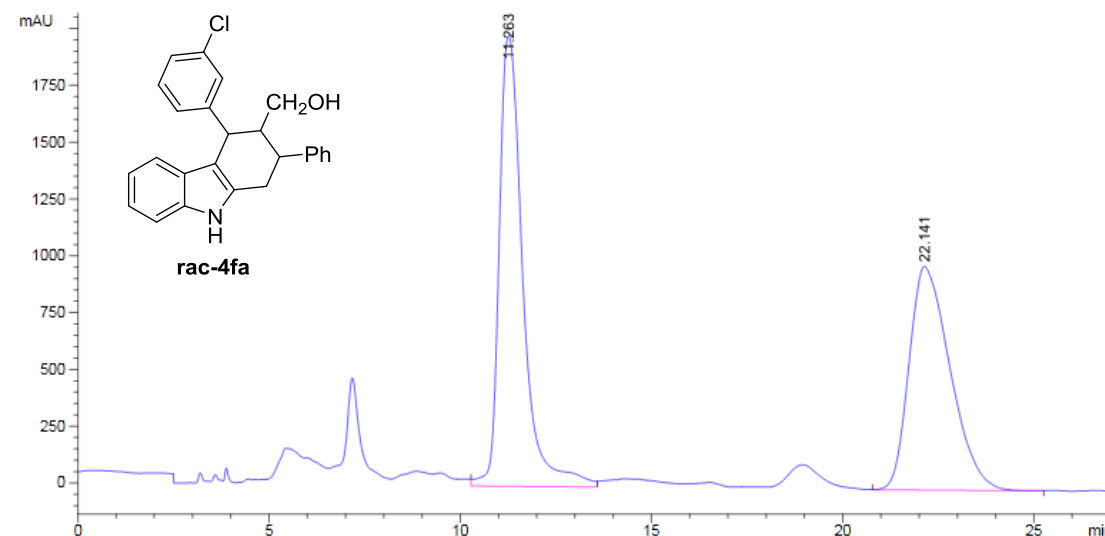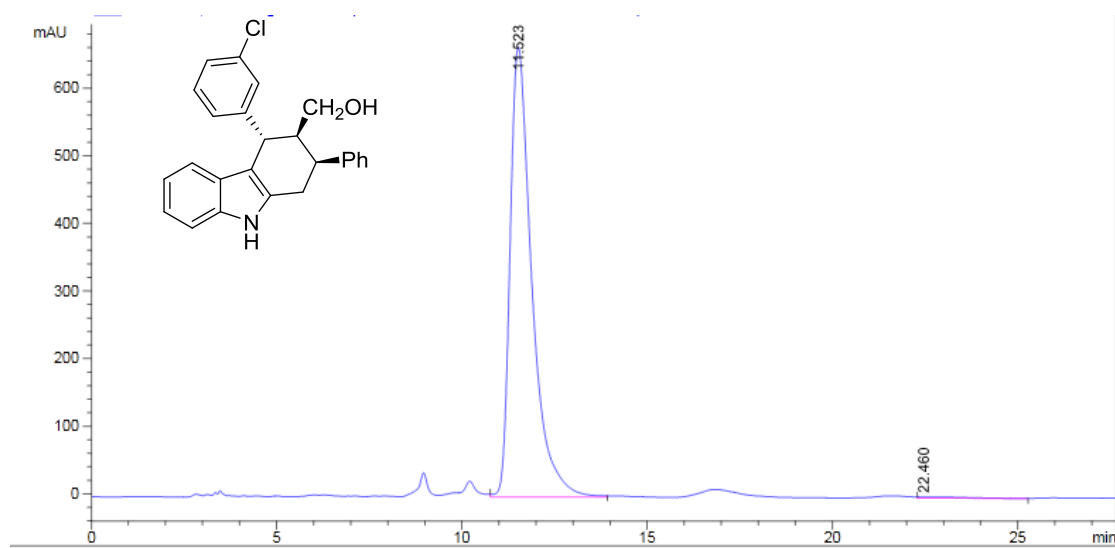



**((2S,3S,4S)-4-(4-chlorophenyl)-2-phenyl-2,3,4,9-tetrahydro-1H-carbazol-3-yl)methanol (4ga)**

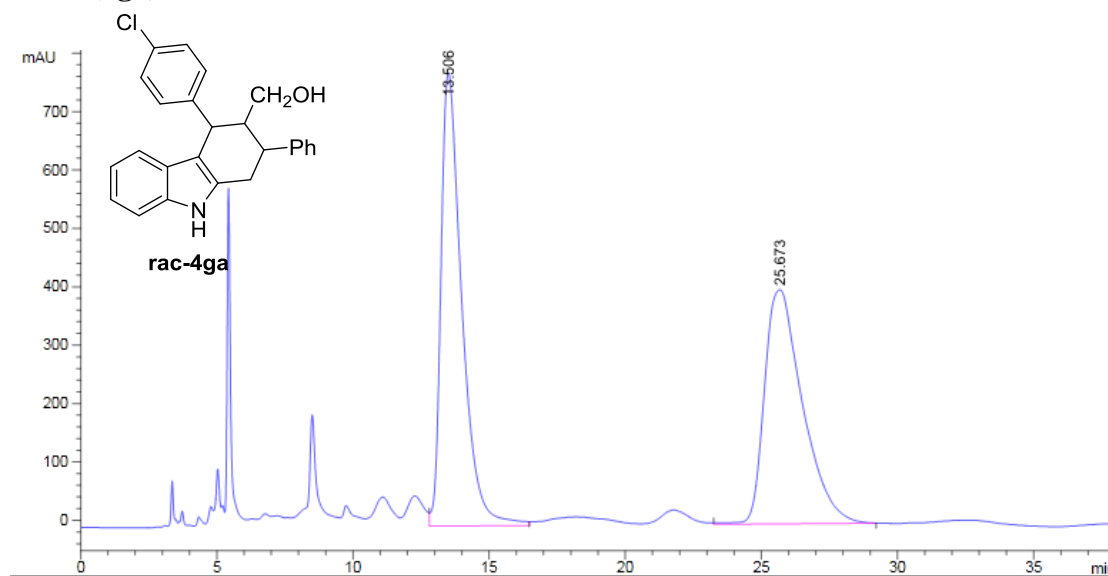

| Peak # | RetTime [min] | Type | Width [min] | Area mAU *s | Height [mAU] | Area %  |
|--------|---------------|------|-------------|-------------|--------------|---------|
| 1      | 13.506        | VB   | 0.7809      | 4.13111e4   | 776.43036    | 51.5142 |
| 2      | 25.673        | VB   | 1.4087      | 3.88825e4   | 400.70239    | 48.4858 |

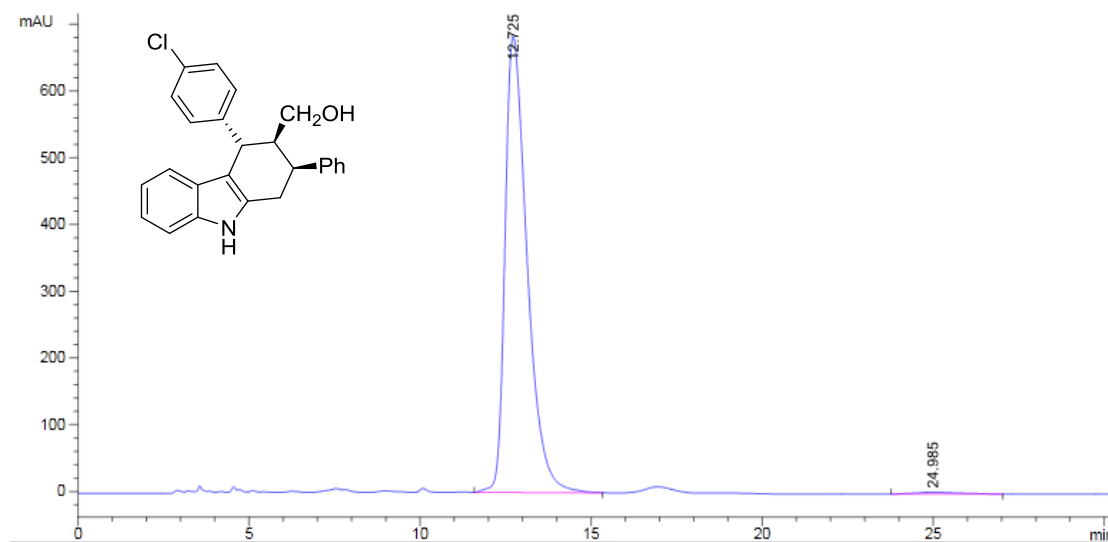

| Peak # | RetTime [min] | Type | Width [min] | Area mAU *s | Height [mAU] | Area %  |
|--------|---------------|------|-------------|-------------|--------------|---------|
| 1      | 12.725        | BB   | 0.6869      | 3.06708e4   | 683.06854    | 99.1650 |
| 2      | 24.985        | BB   | 1.0973      | 258.26514   | 2.86776      | 0.8350  |

**((2S,3S,4S)-4-(4-bromophenyl)-2-phenyl-2,3,4,9-tetrahydro-1H-carbazol-3-yl)methanol (4ha)**

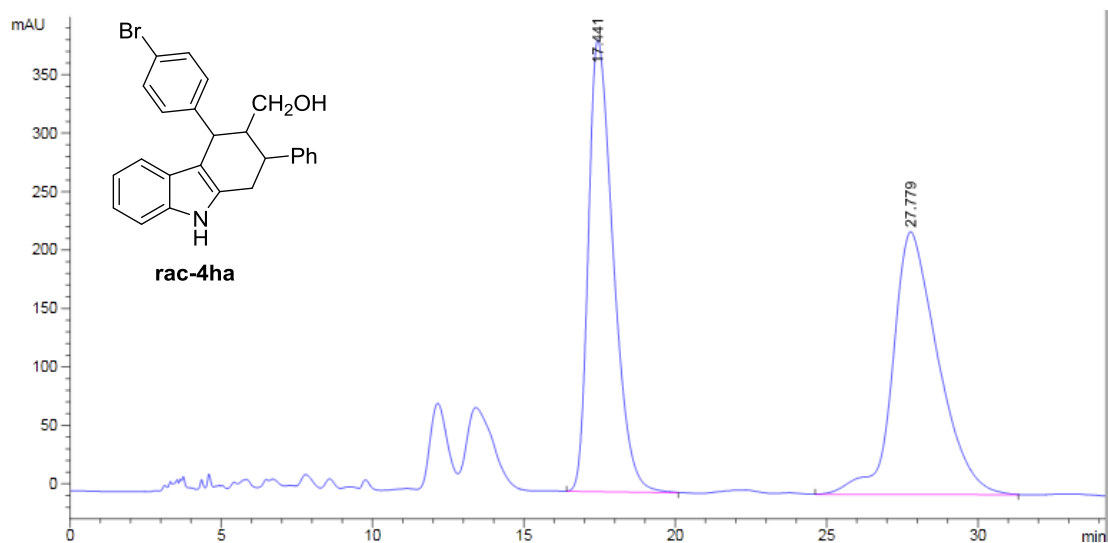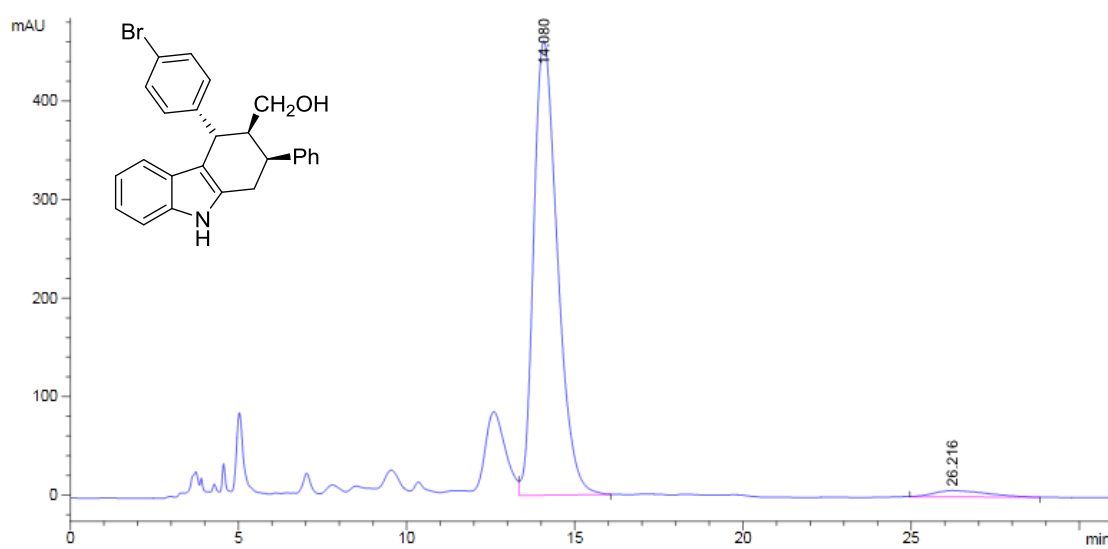

**((2S,3S,4S)-2-phenyl-4-(4-(trifluoromethyl)phenyl)-2,3,4,9-tetrahydro-1H-carbazol-3-yl)methanol (4ia)**

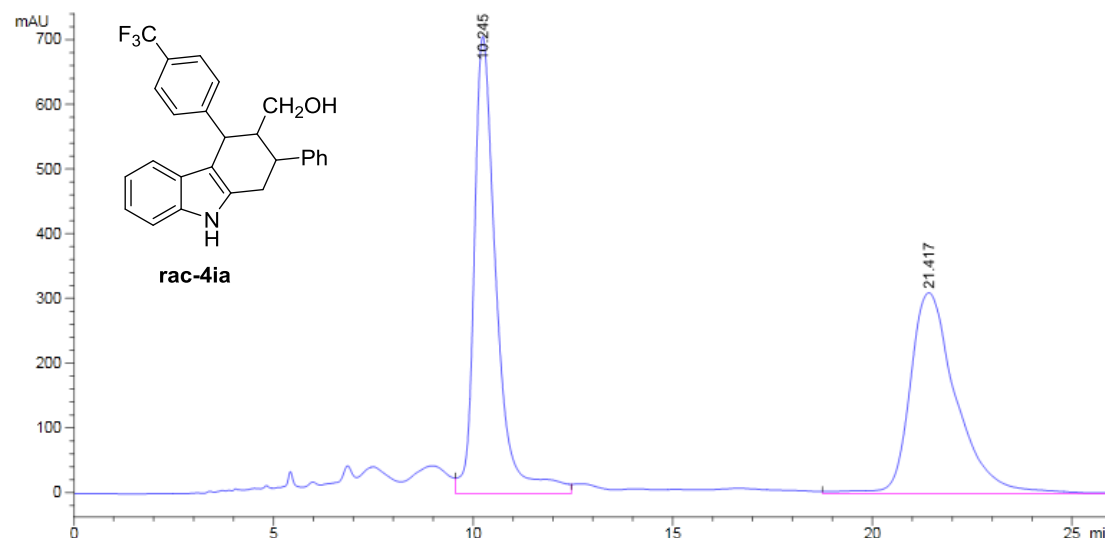

| Peak # | RetTime [min] | Type | Width [min] | Area mAU  | Height [mAU] | Area %  |
|--------|---------------|------|-------------|-----------|--------------|---------|
| 1      | 10.245        | VV   | 0.5701      | 2.71268e4 | 706.82684    | 51.9806 |
| 2      | 21.417        | VBA  | 1.1863      | 2.50596e4 | 310.46713    | 48.0194 |

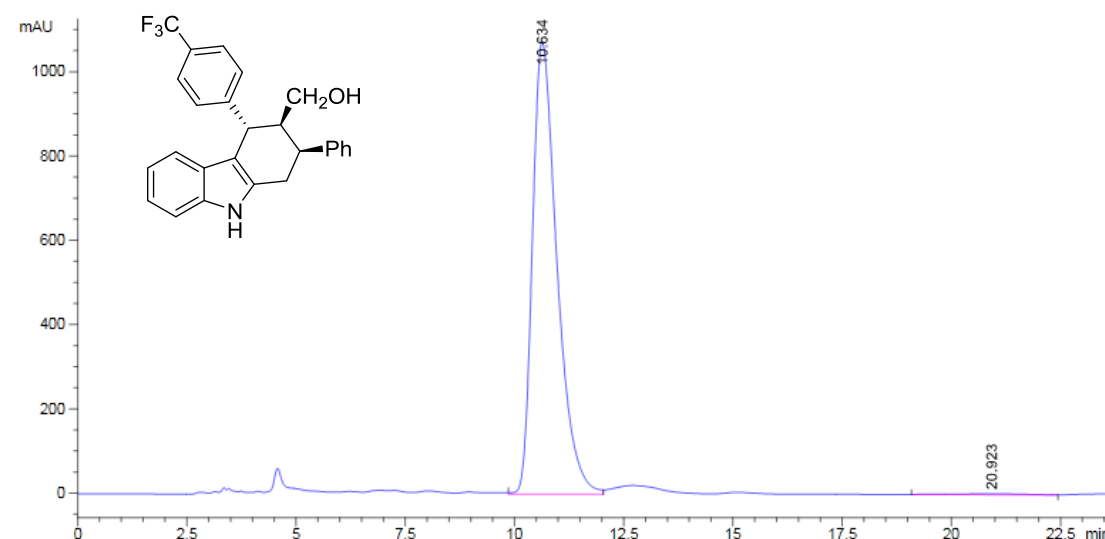

| Peak # | RetTime [min] | Type | Width [min] | Area mAU  | Height [mAU] | Area %  |
|--------|---------------|------|-------------|-----------|--------------|---------|
| 1      | 10.634        | VV   | 0.6071      | 4.19518e4 | 1074.14185   | 99.4971 |
| 2      | 20.923        | BV   | 1.1969      | 212.06166 | 2.58225      | 0.5029  |

**4-((2S,3S,4S)-3-(hydroxymethyl)-2-phenyl-2,3,4,9-tetrahydro-1H-carbazol-4-yl)benzonitrile (4ja)**

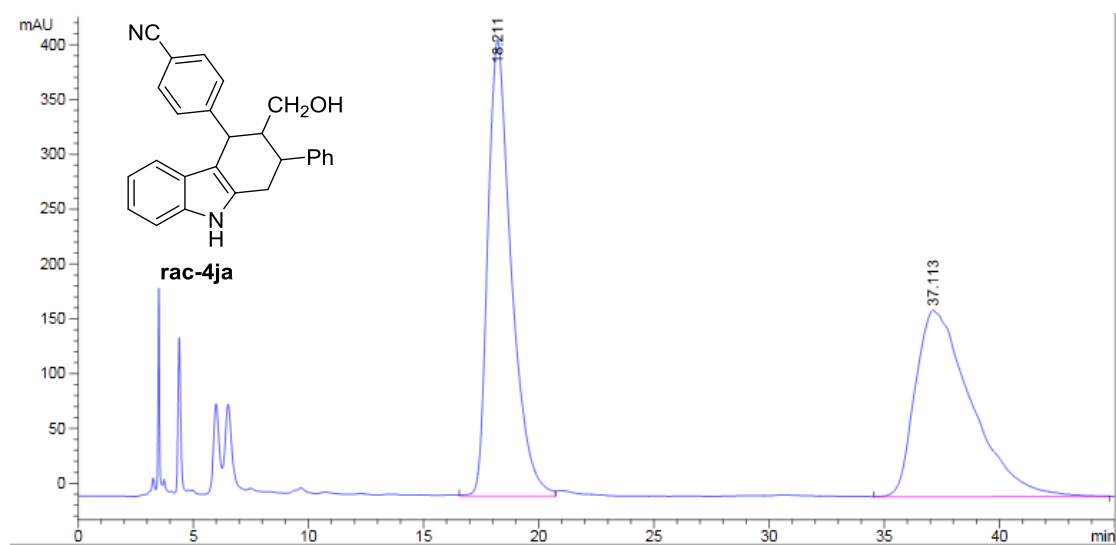

| Peak # | RetTime [min] | Type | Width [min] | Area mAU  | Height [mAU] | Area %  |
|--------|---------------|------|-------------|-----------|--------------|---------|
| 1      | 18.211        | BV   | 1.0590      | 2.94721e4 | 416.22723    | 50.7173 |
| 2      | 37.113        | VB   | 2.1930      | 2.86384e4 | 169.95695    | 49.2827 |

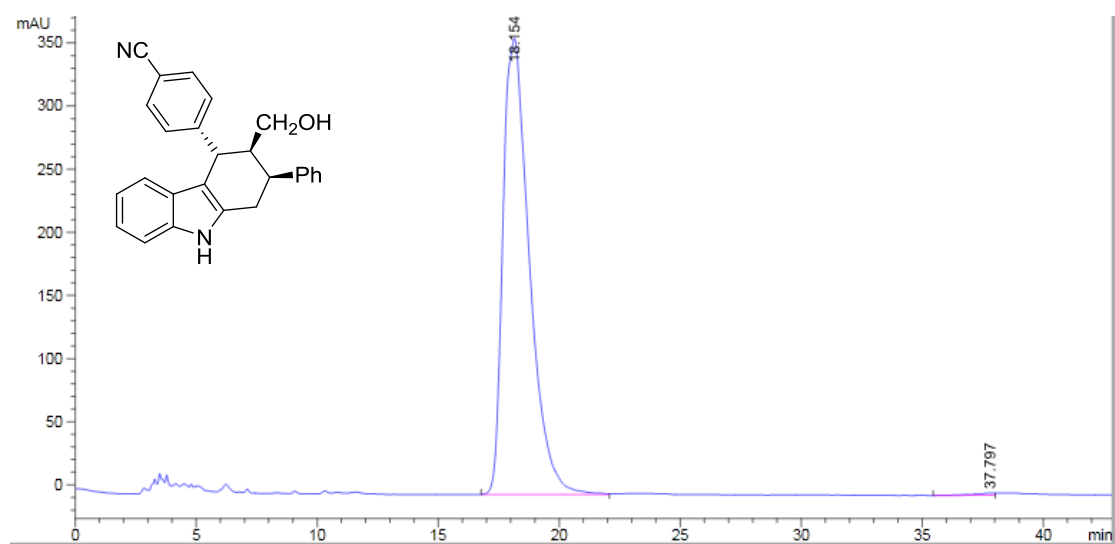

| Peak # | RetTime [min] | Type | Width [min] | Area mAU  | Height [mAU] | Area %  |
|--------|---------------|------|-------------|-----------|--------------|---------|
| 1      | 18.154        | BB   | 0.9888      | 2.73665e4 | 361.19360    | 99.6016 |
| 2      | 37.797        | BV   | 0.8236      | 109.47755 | 1.74858      | 0.3984  |

**methyl4-((2S,3S,4S)-3-(hydroxymethyl)-2-phenyl-2,3,4,9-tetrahydro-1H-carbazol-4-yl)benzoate (4ka)**

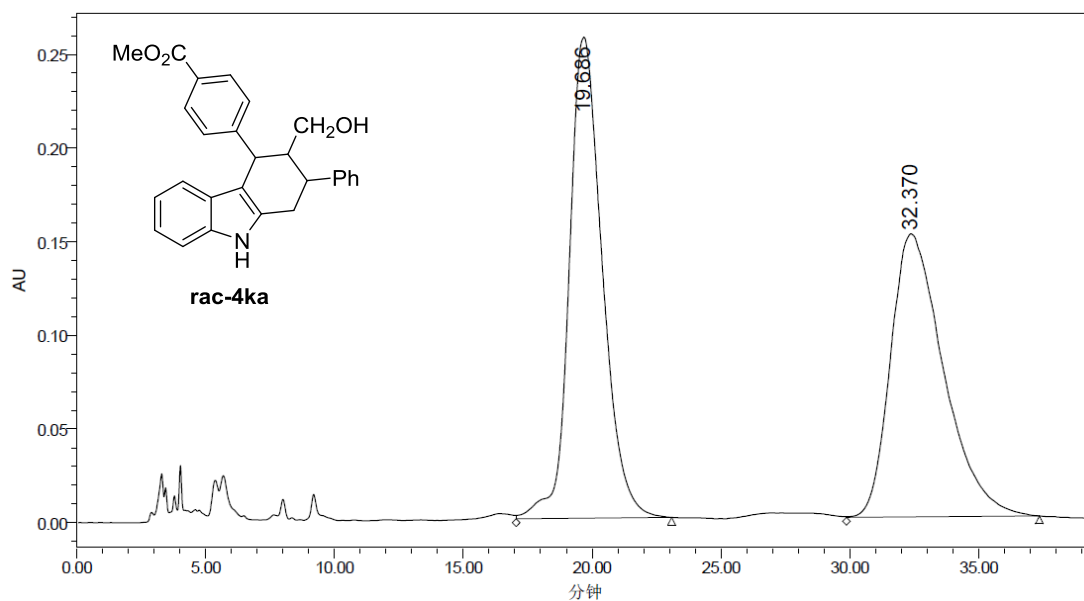

|   | RT<br>(min) | Peak<br>Type | Area<br>(礦*sec) | % Area | Height<br>(礦) | % Height | Integration<br>Type | Points<br>Across Peak | Start<br>Time<br>(min) | End<br>Time<br>(min) |
|---|-------------|--------------|-----------------|--------|---------------|----------|---------------------|-----------------------|------------------------|----------------------|
| 1 | 19.686      | 未知           | 22920350        | 51.45  | 256603        | 62.94    | VB                  | 362                   | 17.050                 | 23.083               |
| 2 | 32.370      | 未知           | 21628533        | 48.55  | 151085        | 37.06    | VB                  | 449                   | 29.867                 | 37.350               |

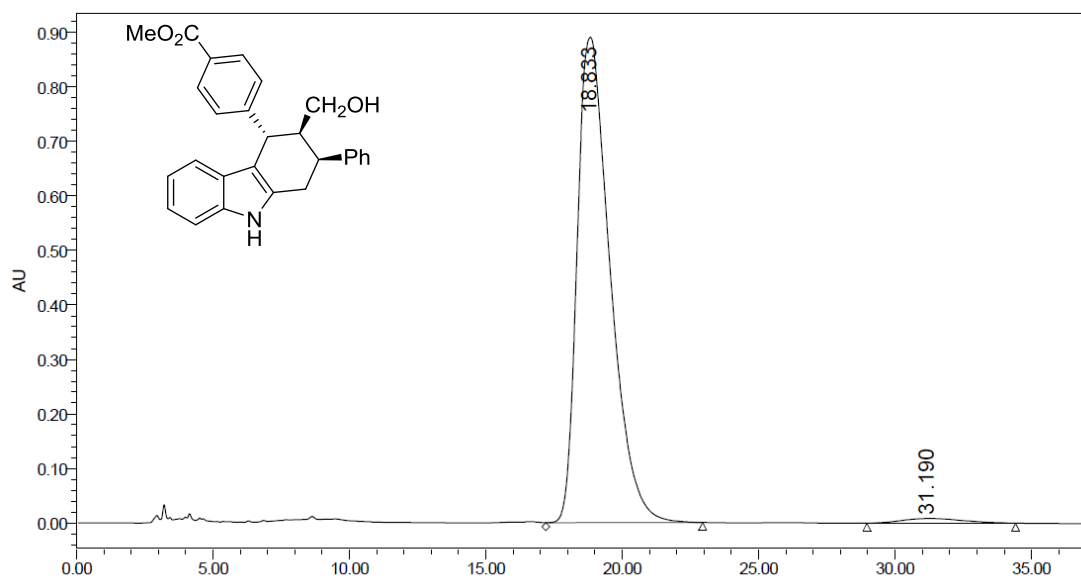

|   | RT<br>(min) | Peak<br>Type | Area<br>(礦*sec) | % Area | Height<br>(礦) | % Height | Integration<br>Type | Points<br>Across Peak | Start<br>Time<br>(min) | End<br>Time<br>(min) |
|---|-------------|--------------|-----------------|--------|---------------|----------|---------------------|-----------------------|------------------------|----------------------|
| 1 | 18.833      | 未知           | 74614538        | 98.25  | 890503        | 99.01    | VB                  | 345                   | 17.200                 | 22.950               |
| 2 | 31.190      | 未知           | 1327692         | 1.75   | 8896          | 0.99     | BB                  | 327                   | 28.967                 | 34.417               |

**((2S,3S,4S)-4-(4-methoxyphenyl)-2-phenyl-2,3,4,9-tetrahydro-1H-carbazol-3-yl)  
methanol (4la)**

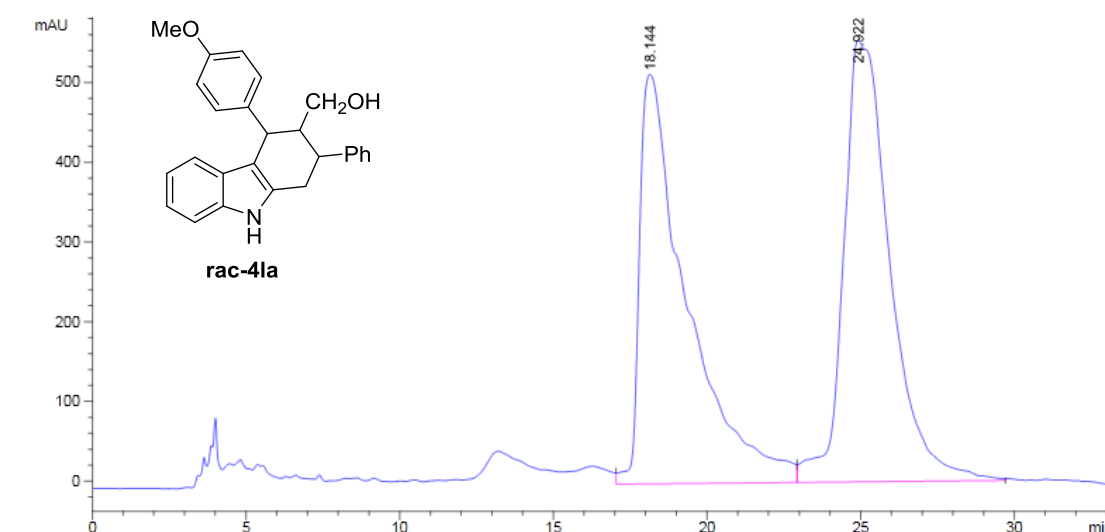

| Peak # | RetTime [min] | Type | Width [min] | Area mAU  | *s | Height [mAU] | Area %  |
|--------|---------------|------|-------------|-----------|----|--------------|---------|
| 1      | 18.144        | VV   | 1.5262      | 5.48632e4 |    | 513.42957    | 48.4543 |
| 2      | 24.922        | VB   | 1.3304      | 5.83634e4 |    | 554.27417    | 51.5457 |

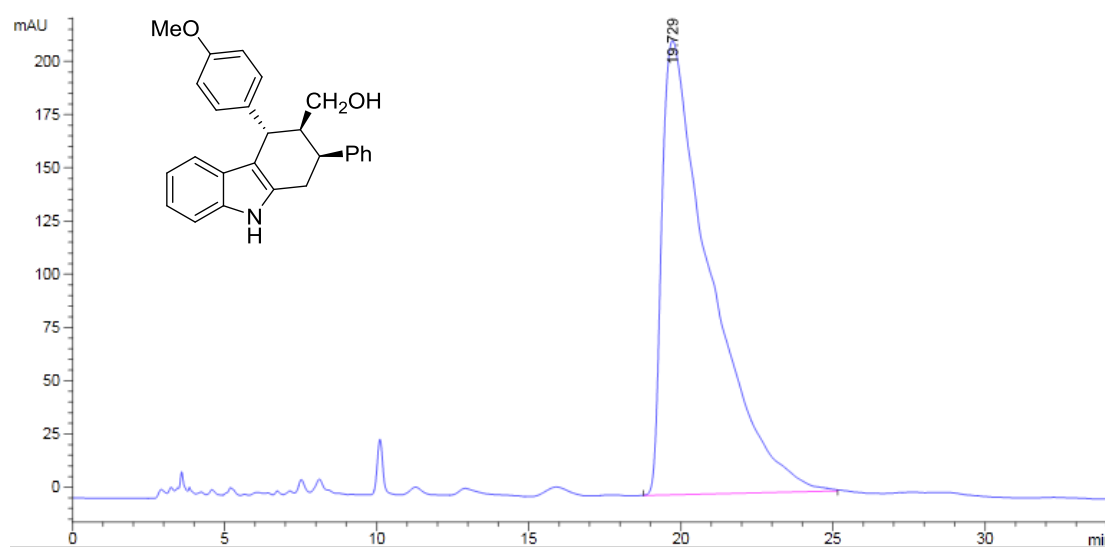

| Peak # | RetTime [min] | Type | Width [min] | Area mAU  | *s | Height [mAU] | Area %   |
|--------|---------------|------|-------------|-----------|----|--------------|----------|
| 1      | 19.729        | BB   | 1.5361      | 2.37728e4 |    | 213.31628    | 100.0000 |

**((2S,3S,4S)-4-(naphthalen-1-yl)-2-phenyl-2,3,4,9-tetrahydro-1H-carbazol-3-yl)methanol (4ma)**

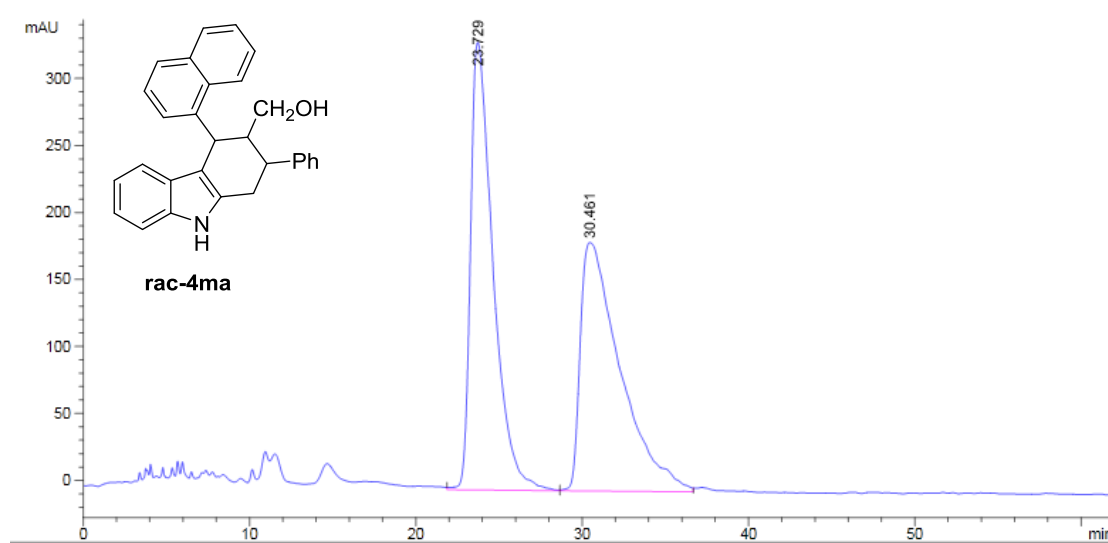

| Peak # | RetTime [min] | Type | Width [min] | Area mAU *s | Height [mAU] | Area %  |
|--------|---------------|------|-------------|-------------|--------------|---------|
| 1      | 23.729        | VB   | 1.2919      | 3.14092e4   | 334.10483    | 50.4209 |
| 2      | 30.461        | BV   | 2.2633      | 3.08848e4   | 185.45058    | 49.5791 |

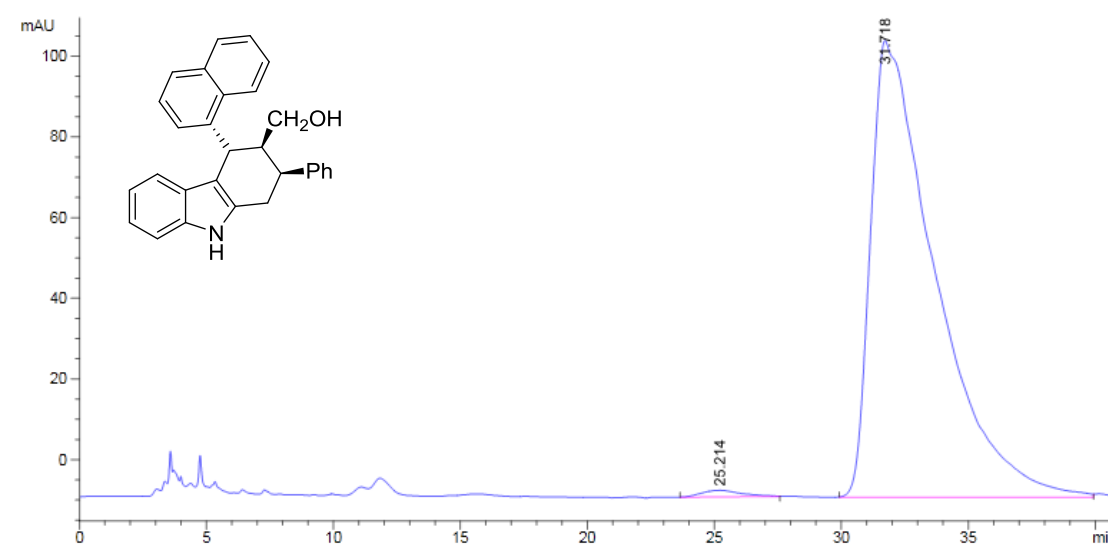

| Peak # | RetTime [min] | Type | Width [min] | Area mAU *s | Height [mAU] | Area %  |
|--------|---------------|------|-------------|-------------|--------------|---------|
| 1      | 25.214        | BB   | 1.3308      | 178.08234   | 1.65539      | 0.8854  |
| 2      | 31.718        | BV   | 2.2005      | 1.99359e4   | 113.18633    | 99.1146 |





**((2S,3S,4R)-2-phenyl-4-(thiophen-2-yl)-2,3,4,9-tetrahydro-1H-carbazol-3-yl)methanol (4na)**

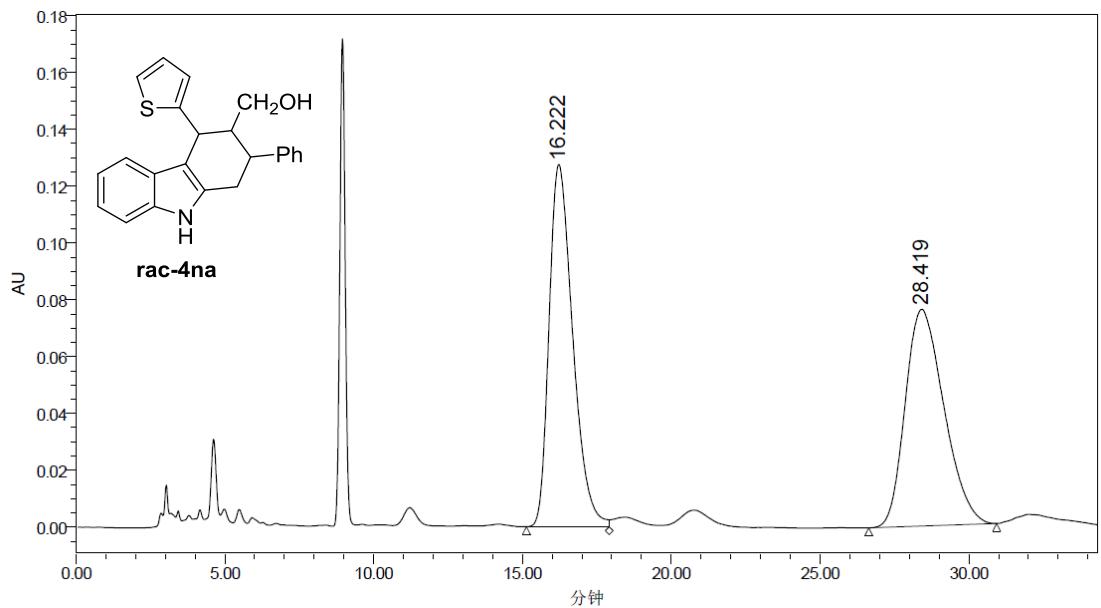

|   | RT<br>(min) | Peak<br>Type | Area<br>(礦*sec) | % Area | Height<br>(礦) | % Height | Integration<br>Type | Points<br>Across Peak | Start<br>Time<br>(min) | End<br>Time<br>(min) |
|---|-------------|--------------|-----------------|--------|---------------|----------|---------------------|-----------------------|------------------------|----------------------|
| 1 | 16.222      | 未知           | 7054358         | 50.54  | 127498        | 62.55    | BV                  | 167                   | 15.133                 | 17.917               |
| 2 | 28.419      | 未知           | 6902675         | 49.46  | 76329         | 37.45    | BB                  | 258                   | 26.633                 | 30.933               |

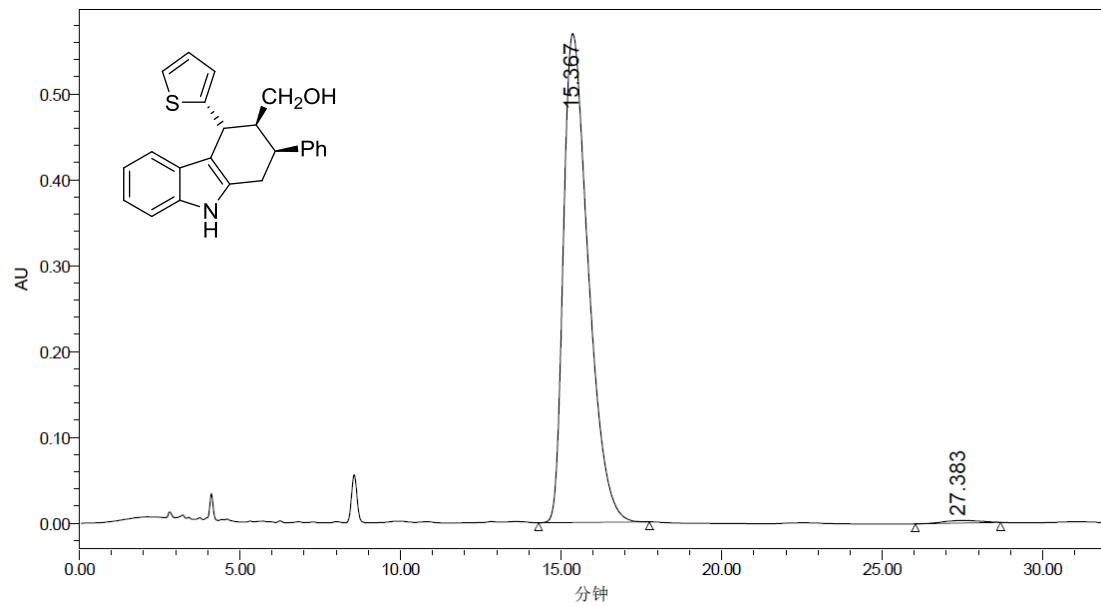

|   | RT<br>(min) | Peak<br>Type | Area<br>(礦*sec) | % Area | Height<br>(礦) | % Height | Integration<br>Type | Peak<br>Codes | Points<br>Across Peak | Start<br>Time<br>(min) |
|---|-------------|--------------|-----------------|--------|---------------|----------|---------------------|---------------|-----------------------|------------------------|
| 1 | 15.367      | 未知           | 30612170        | 99.20  | 569362        | 99.44    | BB                  |               | 207                   | 14.300                 |
| 2 | 27.383      | 未知           | 245993          | 0.80   | 3199          | 0.56     | BB                  | 108           | 159                   | 26.033                 |

**((2S,3S,4S)-7-methyl-2,4-diphenyl-2,3,4,9-tetrahydro-1H-carbazol-3-yl)methanol  
(4oa)**

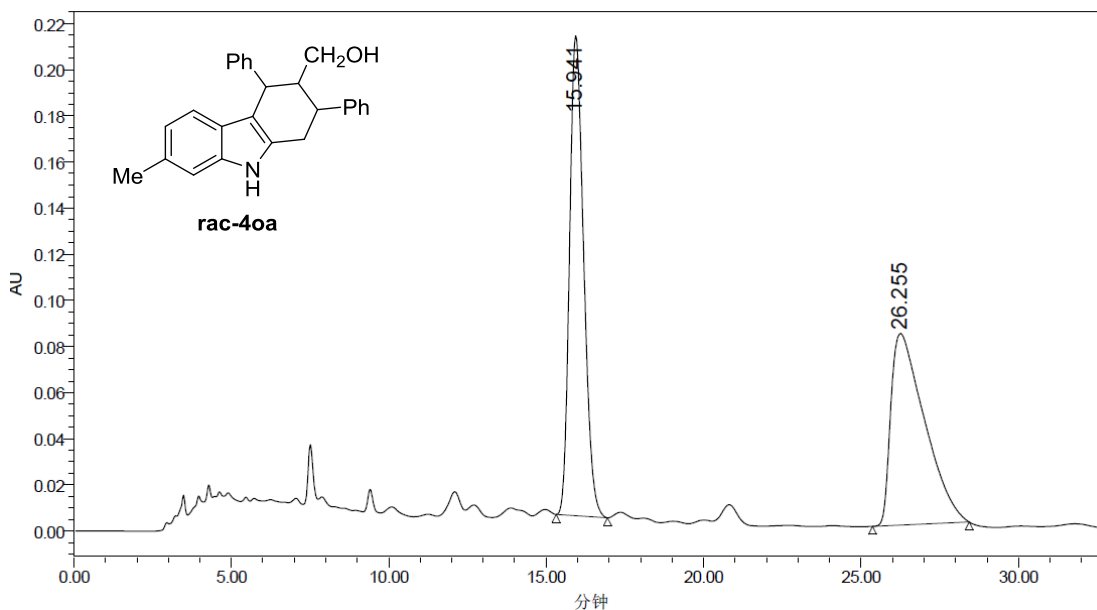

|   | RT<br>(min) | Peak<br>Type | Area<br>(礦*sec) | % Area | Height<br>(礦) | % Height | Integration<br>Type | Points<br>Across Peak | Start<br>Time<br>(min) | End<br>Time<br>(min) |
|---|-------------|--------------|-----------------|--------|---------------|----------|---------------------|-----------------------|------------------------|----------------------|
| 1 | 15.941      | 未知           | 6489833         | 51.24  | 208075        | 71.48    | BB                  | 98                    | 15.317                 | 16.950               |
| 2 | 26.255      | 未知           | 6175419         | 48.76  | 83024         | 28.52    | BB                  | 184                   | 25.367                 | 28.433               |

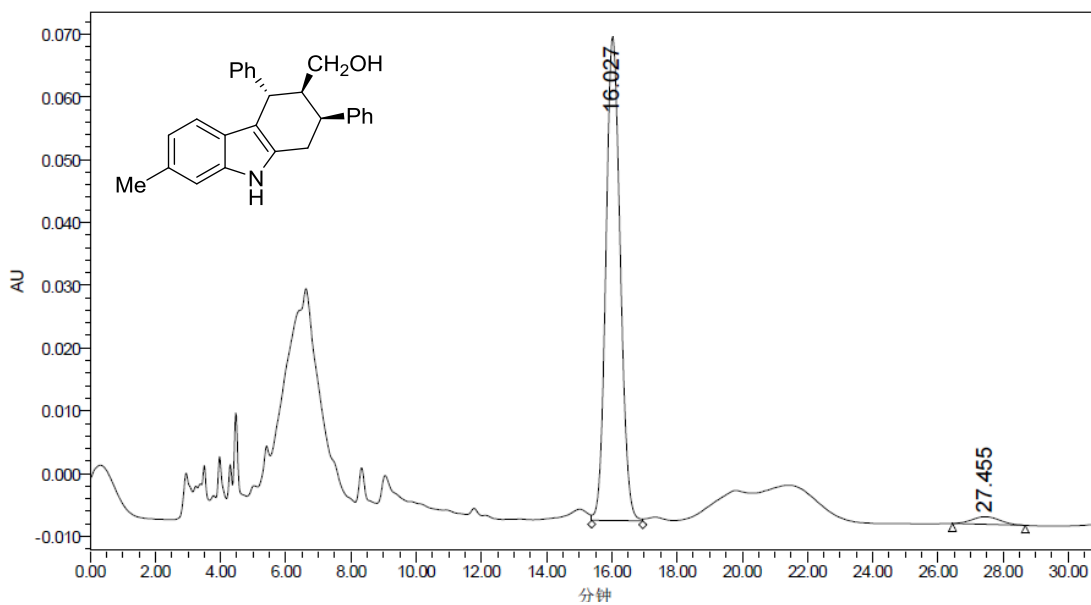

|   | RT<br>(min) | Peak<br>Type | Area<br>(礦*sec) | % Area | Height<br>(礦) | % Height | Integration<br>Type | Points<br>Across Peak | Start<br>Time<br>(min) | End<br>Time<br>(min) |
|---|-------------|--------------|-----------------|--------|---------------|----------|---------------------|-----------------------|------------------------|----------------------|
| 1 | 16.027      | 未知           | 2354214         | 97.02  | 77099         | 98.43    | VV                  | 94                    | 15.383                 | 16.950               |
| 2 | 27.455      | 未知           | 72222           | 2.98   | 1228          | 1.57     | BB                  | 134                   | 26.450                 | 28.683               |

**((2S,3S,4S)-7-fluoro-2,4-diphenyl-2,3,4,9-tetrahydro-1H-carbazol-3-yl)methanol  
(4pa)**

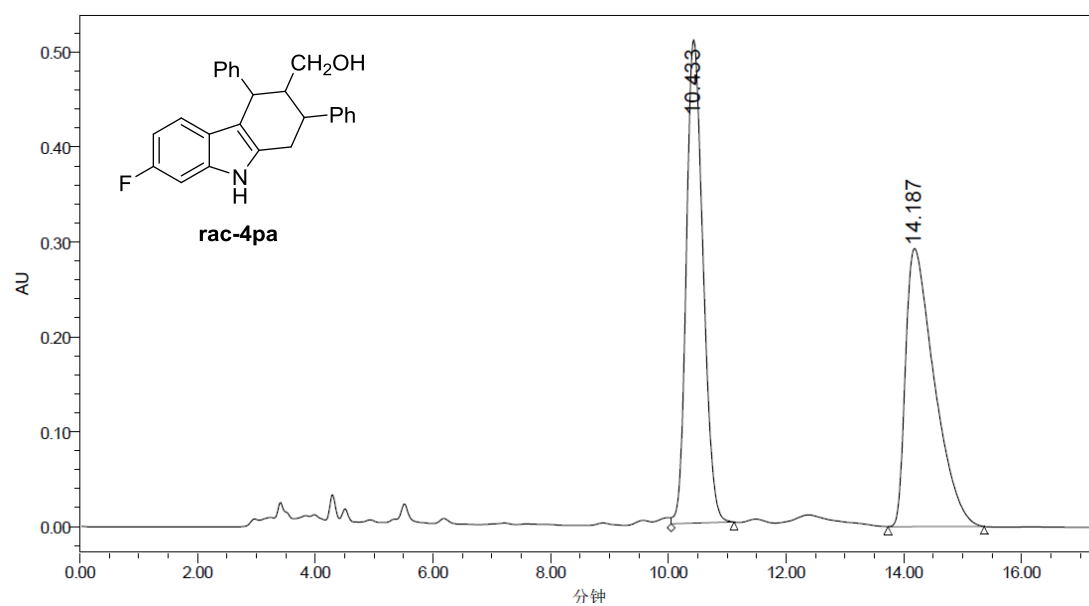

|   | RT<br>(min) | Peak<br>Type | Area<br>(礦*sec) | % Area | Height<br>(礦) | % Height | Integration<br>Type | Points<br>Across Peak | Start<br>Time<br>(min) | End<br>Time<br>(min) |
|---|-------------|--------------|-----------------|--------|---------------|----------|---------------------|-----------------------|------------------------|----------------------|
| 1 | 10.433      | 未知           | 10035823        | 50.20  | 509541        | 63.49    | VB                  | 64                    | 10.050                 | 11.117               |
| 2 | 14.187      | 未知           | 9954085         | 49.80  | 293028        | 36.51    | BB                  | 98                    | 13.733                 | 15.367               |

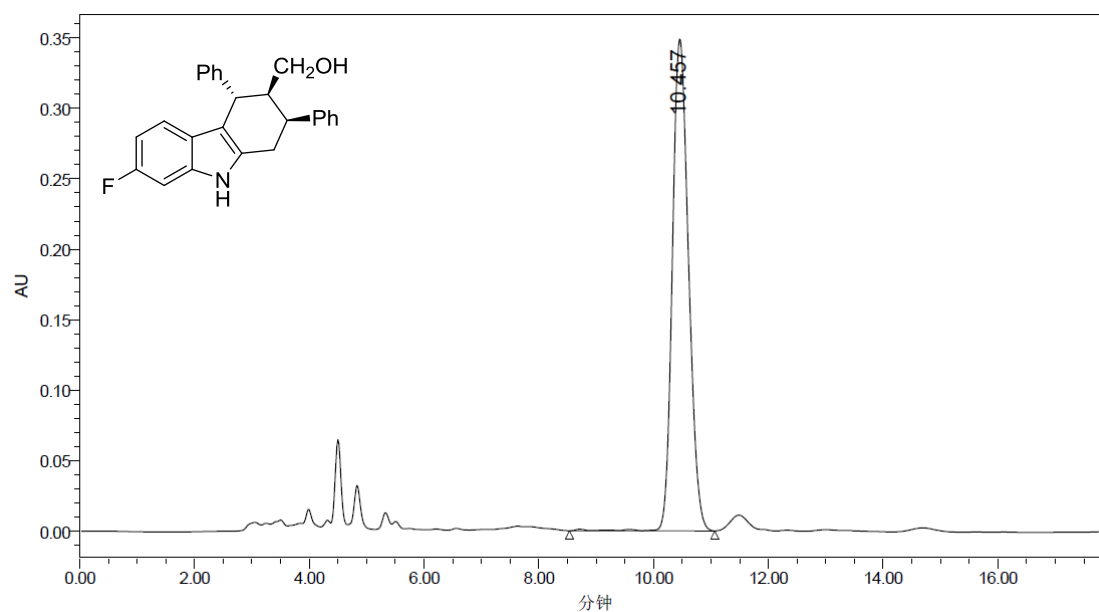

|   | RT<br>(min) | Peak<br>Type | Area<br>(礦*sec) | % Area | Height<br>(礦) | % Height | Integration<br>Type | Points<br>Across Peak | Start<br>Time<br>(min) | End<br>Time<br>(min) |
|---|-------------|--------------|-----------------|--------|---------------|----------|---------------------|-----------------------|------------------------|----------------------|
| 1 | 10.457      | 未知           | 6840837         | 100.00 | 349546        | 100.00   | BB                  | 152                   | 8.533                  | 11.067               |

**methyl(2S,3S,4S)-3-(hydroxymethyl)-2,4-diphenyl-2,3,4,9-tetrahydro-1H-carbazole-7-carboxylate (4qa)**

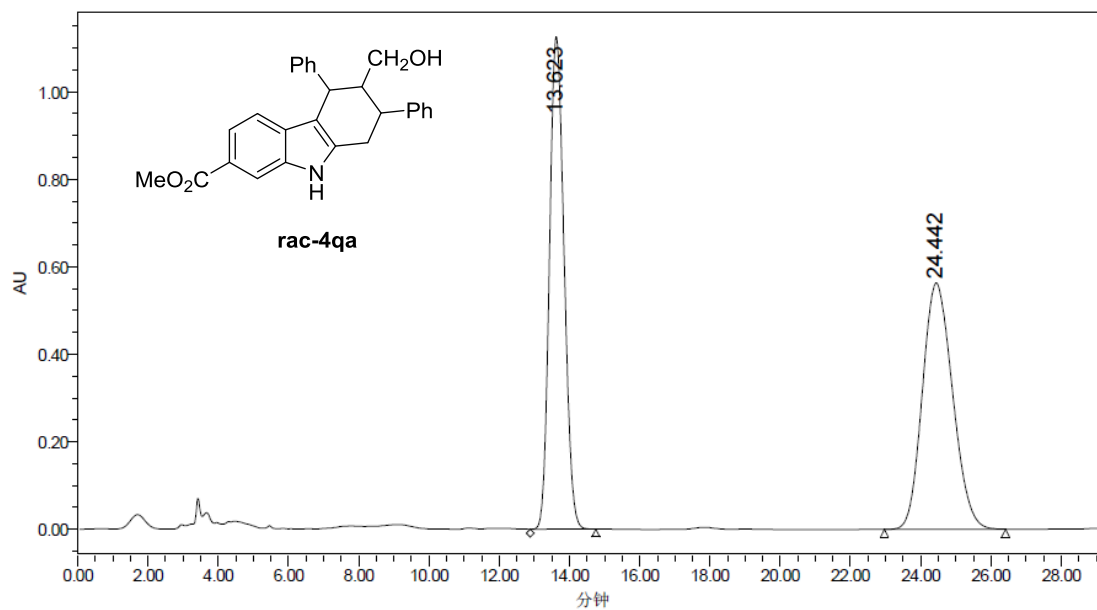

|   | RT<br>(min) | Peak<br>Type | Area<br>(礦*sec) | % Area | Height<br>(礦) | % Height | Integration<br>Type | Points<br>Across Peak | Start<br>Time<br>(min) | End<br>Time<br>(min) |
|---|-------------|--------------|-----------------|--------|---------------|----------|---------------------|-----------------------|------------------------|----------------------|
| 1 | 13.623      | 未知           | 32460214        | 49.10  | 1125889       | 66.65    | VB                  | 112                   | 12.883                 | 14.750               |
| 2 | 24.442      | 未知           | 33646577        | 50.90  | 563400        | 33.35    | BB                  | 207                   | 22.967                 | 26.417               |

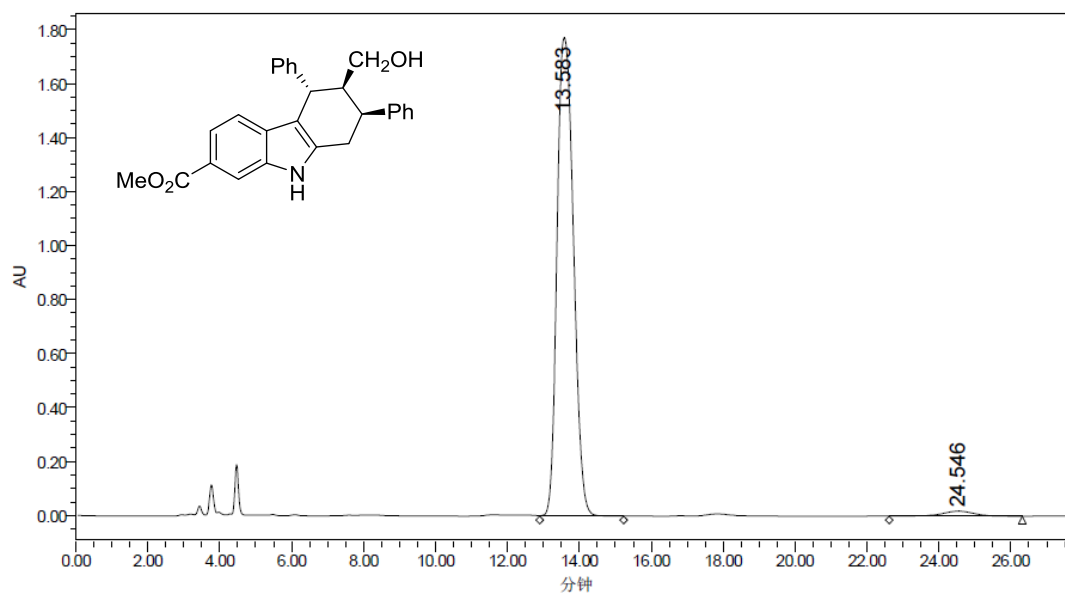

|   | RT<br>(min) | Peak<br>Type | Area<br>(礦*sec) | % Area | Height<br>(礦) | % Height | Integration<br>Type | Points<br>Across Peak | Start<br>Time<br>(min) | End<br>Time<br>(min) |
|---|-------------|--------------|-----------------|--------|---------------|----------|---------------------|-----------------------|------------------------|----------------------|
| 1 | 13.583      | 未知           | 56227930        | 97.95  | 1773515       | 98.97    | VV                  | 140                   | 12.900                 | 15.233               |
| 2 | 24.546      | 未知           | 1175830         | 2.05   | 18509         | 1.03     | VB                  | 222                   | 22.617                 | 26.317               |

**((2S,3S,4S)-6-methyl-2,4-diphenyl-2,3,4,9-tetrahydro-1H-carbazol-3-yl)methanol  
(4ra)**

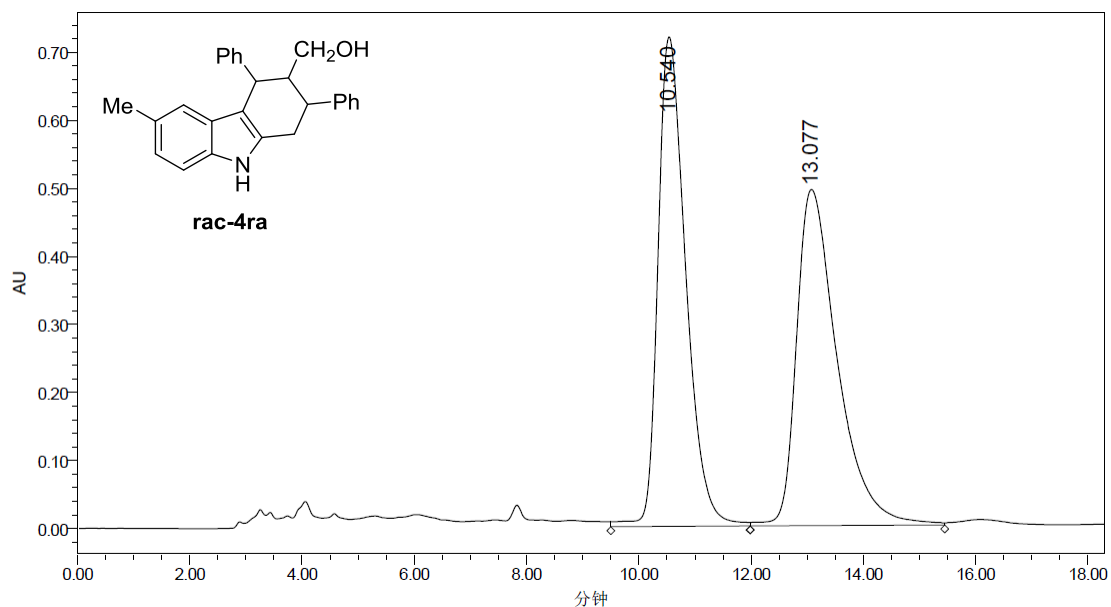

|   | RT<br>(min) | Peak<br>Type | Area<br>(礦*sec) | % Area | Height<br>(礦) | % Height | Integration<br>Type | Points<br>Across Peak | Start<br>Time<br>(min) | End<br>Time<br>(min) |
|---|-------------|--------------|-----------------|--------|---------------|----------|---------------------|-----------------------|------------------------|----------------------|
| 1 | 10.540      | 未知           | 24853195        | 49.86  | 719959        | 59.30    | VV                  | 149                   | 9.500                  | 11.983               |
| 2 | 13.077      | 未知           | 24992539        | 50.14  | 494233        | 40.70    | VV                  | 208                   | 11.983                 | 15.450               |

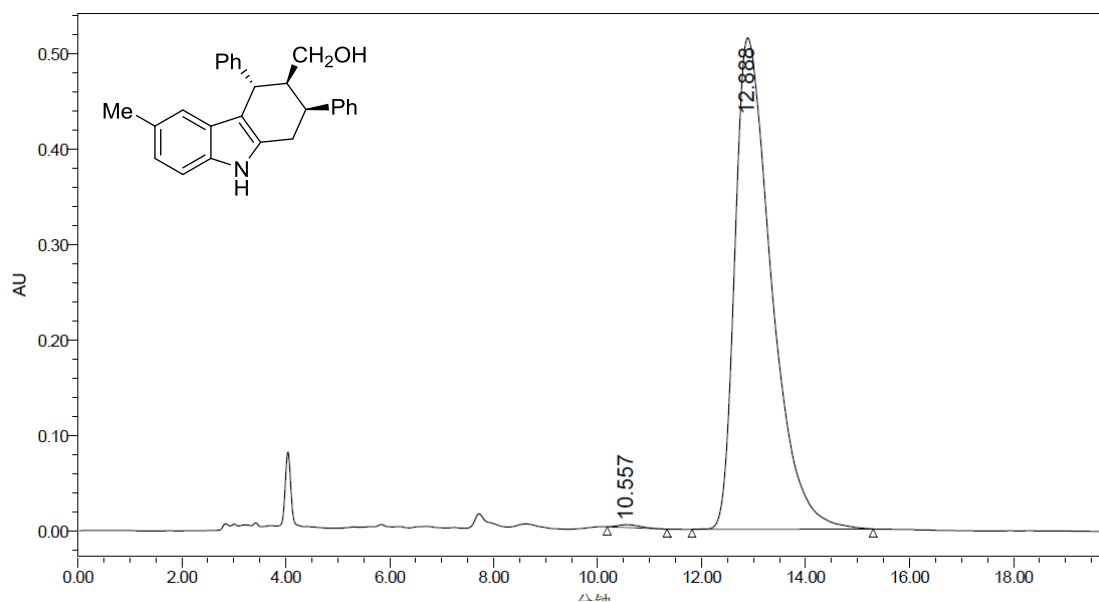

|   | RT<br>(min) | Peak<br>Type | Area<br>(礦*sec) | % Area | Height<br>(礦) | % Height | Integration<br>Type | Points<br>Across Peak | Start<br>Time<br>(min) | End<br>Time<br>(min) |
|---|-------------|--------------|-----------------|--------|---------------|----------|---------------------|-----------------------|------------------------|----------------------|
| 1 | 10.557      | 未知           | 91410           | 0.36   | 2997          | 0.58     | BB                  | 69                    | 10.183                 | 11.333               |
| 2 | 12.888      | 未知           | 24994303        | 99.64  | 514852        | 99.42    | BB                  | 209                   | 11.817                 | 15.300               |

**((2S,3S,4S)-6-fluoro-2,4-diphenyl-2,3,4,9-tetrahydro-1H-carbazol-3-yl)methanol  
(4sa)**

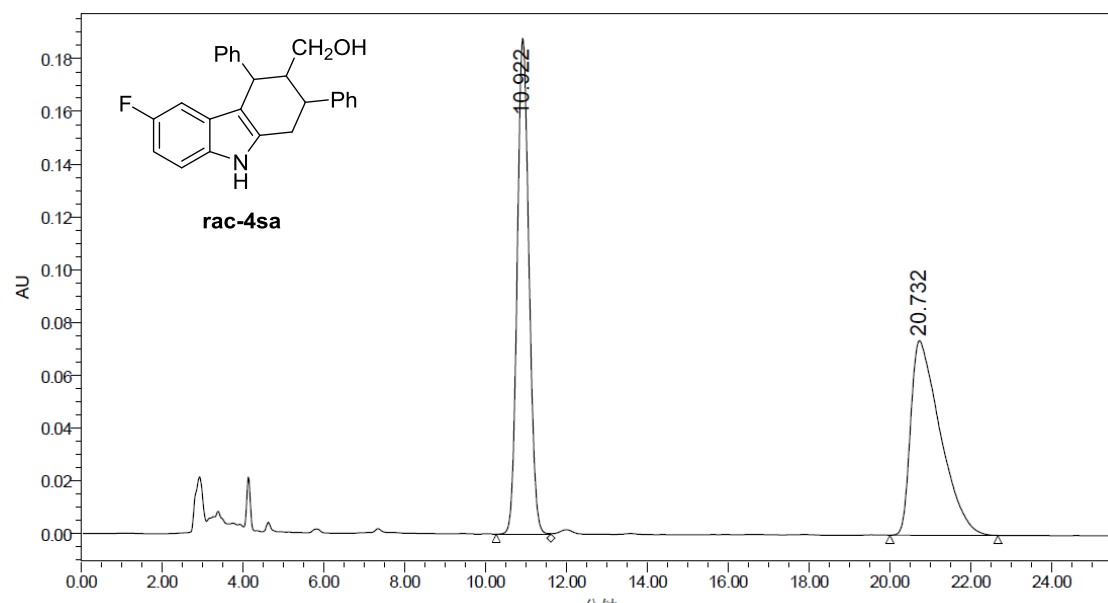

|   | RT<br>(min) | Peak<br>Type | Area<br>(礦*sec) | % Area | Height<br>(礦) | % Height | Integration<br>Type | Points<br>Across Peak | Start<br>Time<br>(min) | End<br>Time<br>(min) |
|---|-------------|--------------|-----------------|--------|---------------|----------|---------------------|-----------------------|------------------------|----------------------|
| 1 | 10.922      | 未知           | 3801925         | 50.40  | 188071        | 71.83    | BV                  | 81                    | 10.267                 | 11.617               |
| 2 | 20.732      | 未知           | 3740857         | 49.60  | 73749         | 28.17    | BB                  | 160                   | 20.000                 | 22.667               |

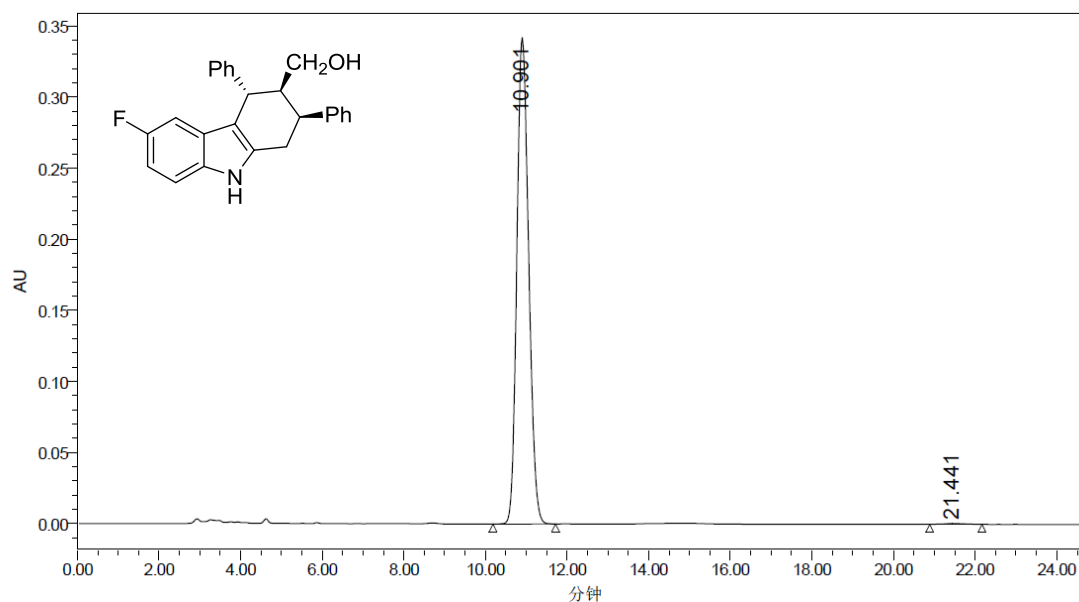

|   | RT<br>(min) | Peak<br>Type | Area<br>(礦*sec) | % Area | Height<br>(礦) | % Height | Integration<br>Type | Points<br>Across Peak | Start<br>Time<br>(min) | End<br>Time<br>(min) |
|---|-------------|--------------|-----------------|--------|---------------|----------|---------------------|-----------------------|------------------------|----------------------|
| 1 | 10.901      | 未知           | 6884624         | 99.69  | 342136        | 99.84    | BB                  | 92                    | 10.183                 | 11.717               |
| 2 | 21.441      | 未知           | 21295           | 0.31   | 546           | 0.16     | BB                  | 77                    | 20.883                 | 22.167               |

**((2S,3S,4S)-6-chloro-2,4-diphenyl-2,3,4,9-tetrahydro-1H-carbazol-3-yl)methanol  
(4ta)**

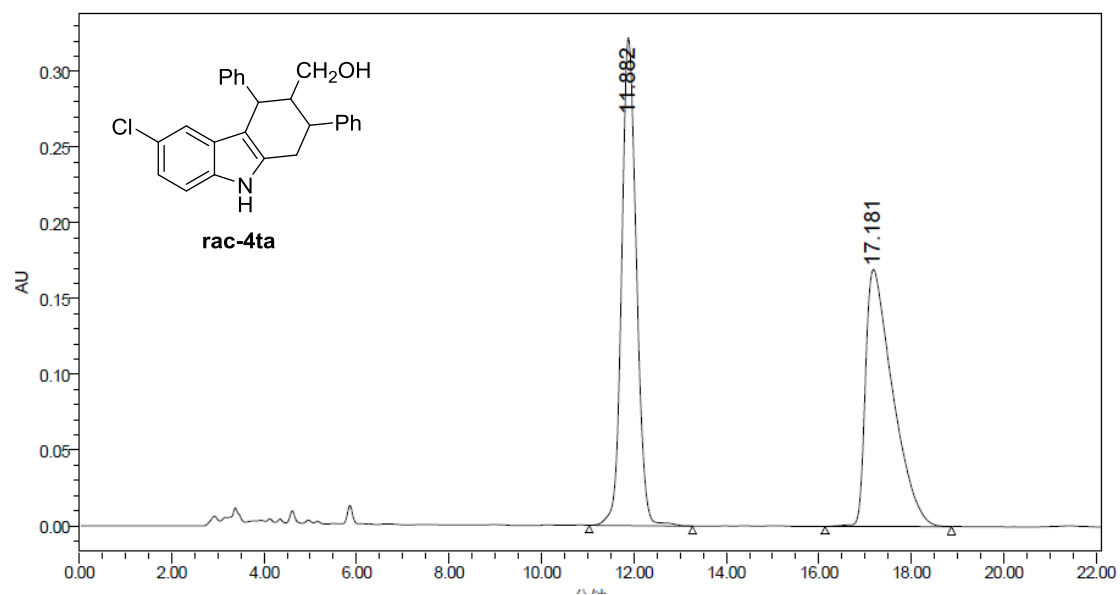

|   | RT<br>(min) | Peak<br>Type | Area<br>(礦*sec) | % Area | Height<br>(礦) | % Height | Integration<br>Type | Points<br>Across Peak | Start<br>Time<br>(min) | End<br>Time<br>(min) |
|---|-------------|--------------|-----------------|--------|---------------|----------|---------------------|-----------------------|------------------------|----------------------|
| 1 | 11.882      | 未知           | 7166182         | 50.81  | 321919        | 65.48    | BB                  | 134                   | 11.033                 | 13.267               |
| 2 | 17.181      | 未知           | 6938805         | 49.19  | 169739        | 34.52    | BB                  | 164                   | 16.133                 | 18.867               |

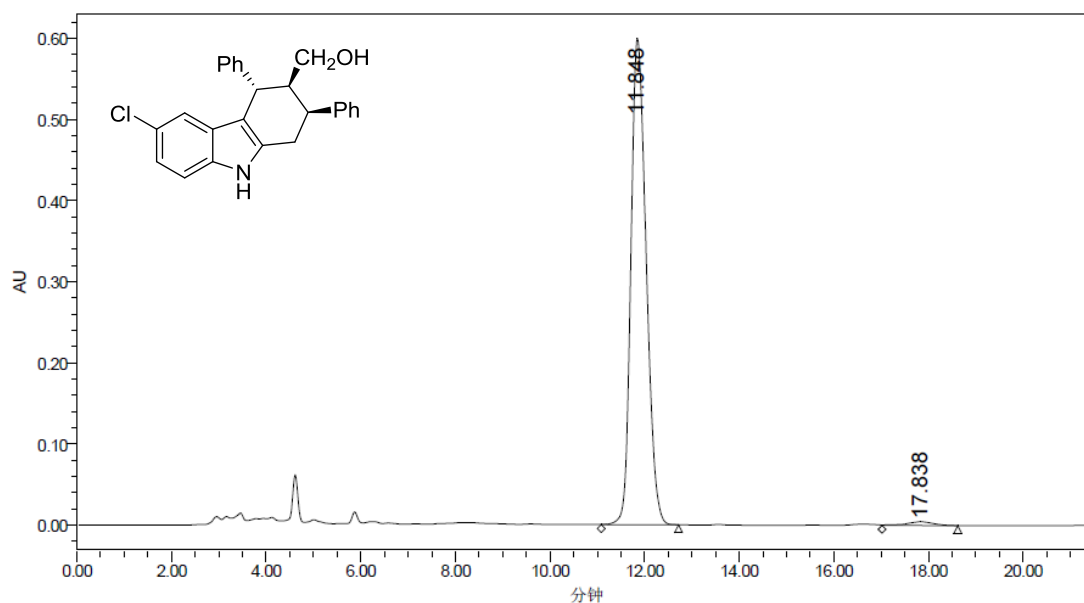

|   | RT<br>(min) | Peak<br>Type | Area<br>(礦*sec) | % Area | Height<br>(礦) | % Height | Integration<br>Type | Points<br>Across Peak | Start<br>Time<br>(min) | End<br>Time<br>(min) |
|---|-------------|--------------|-----------------|--------|---------------|----------|---------------------|-----------------------|------------------------|----------------------|
| 1 | 11.848      | 未知           | 13441502        | 98.70  | 599443        | 99.25    | VB                  | 98                    | 11.083                 | 12.717               |
| 2 | 17.838      | 未知           | 177480          | 1.30   | 4503          | 0.75     | VB                  | 96                    | 17.017                 | 18.617               |

**((2S,3S,4S)-6-methoxy-2,4-diphenyl-2,3,4,9-tetrahydro-1H-carbazol-3-yl)methanol (4ua)**

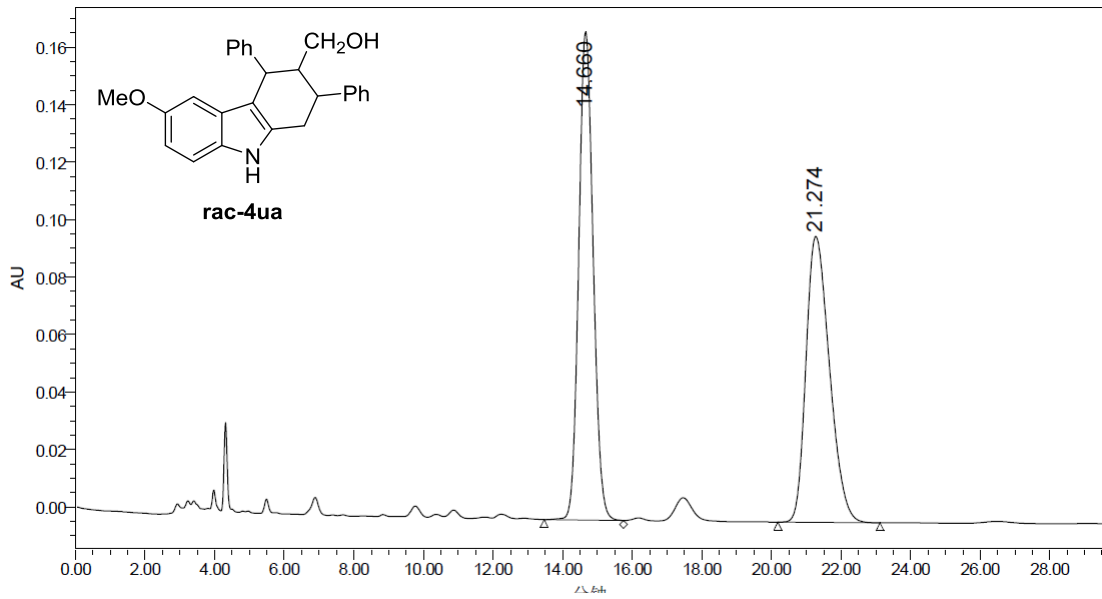

|   | RT<br>(min) | Peak<br>Type | Area<br>(礦*sec) | % Area | Height<br>(礦) | % Height | Integration<br>Type | Points<br>Across Peak | Start<br>Time<br>(min) | End<br>Time<br>(min) |
|---|-------------|--------------|-----------------|--------|---------------|----------|---------------------|-----------------------|------------------------|----------------------|
| 1 | 14.660      | 未知           | 4893446         | 51.17  | 170025        | 63.08    | BV                  | 137                   | 13.467                 | 15.750               |
| 2 | 21.274      | 未知           | 4670441         | 48.83  | 99527         | 36.92    | BB                  | 176                   | 20.183                 | 23.117               |

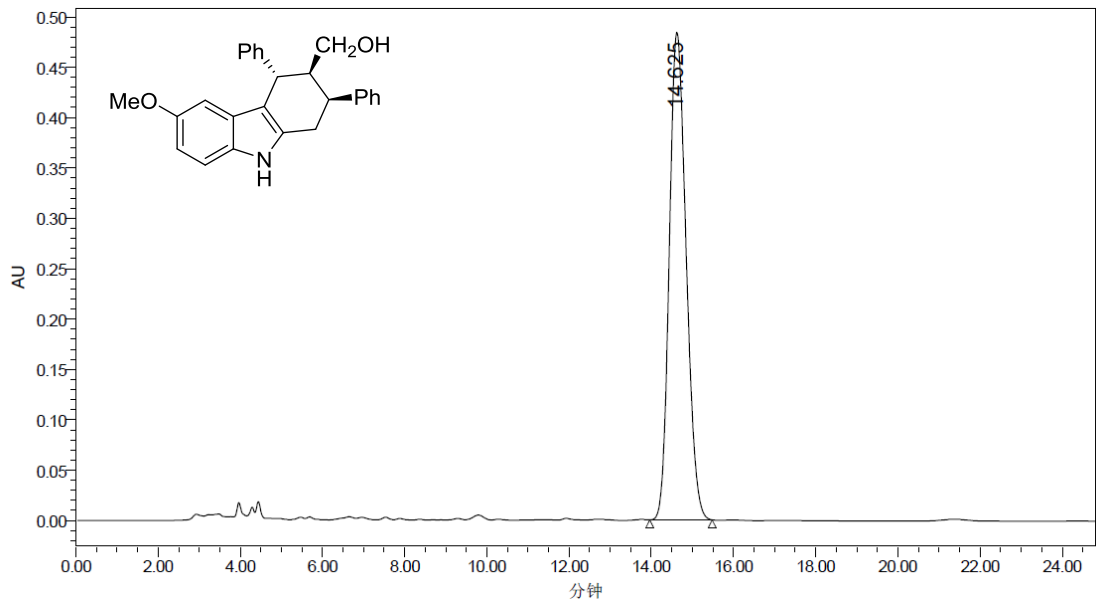

|   | RT<br>(min) | Peak<br>Type | Area<br>(礦*sec) | % Area | Height<br>(礦) | % Height | Integration<br>Type | Points<br>Across Peak | Start<br>Time<br>(min) | End<br>Time<br>(min) |
|---|-------------|--------------|-----------------|--------|---------------|----------|---------------------|-----------------------|------------------------|----------------------|
| 1 | 14.625      | 未知           | 13759342        | 100.00 | 484095        | 100.00   | BB                  | 91                    | 13.967                 | 15.483               |



**((2S,3S,4S)-4-phenyl-2-(p-tolyl)-2,3,4,9-tetrahydro-1H-carbazol-3-yl)methanol  
(4ab)**

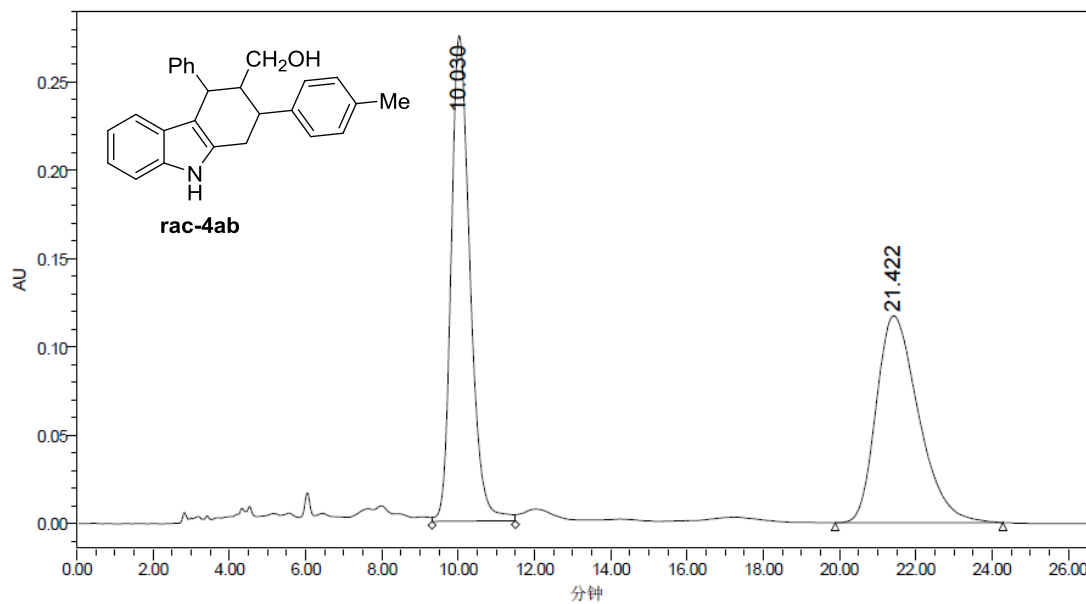

|   | RT<br>(min) | Peak<br>Type | Area<br>(礦*sec) | % Area | Height<br>(礦) | % Height | Integration<br>Type | Points<br>Across Peak | Start<br>Time<br>(min) | End<br>Time<br>(min) |
|---|-------------|--------------|-----------------|--------|---------------|----------|---------------------|-----------------------|------------------------|----------------------|
| 1 | 10.030      | 未知           | 9450240         | 51.10  | 274897        | 70.11    | VV                  | 131                   | 9.317                  | 11.500               |
| 2 | 21.422      | 未知           | 9044378         | 48.90  | 117208        | 29.89    | BB                  | 264                   | 19.883                 | 24.283               |

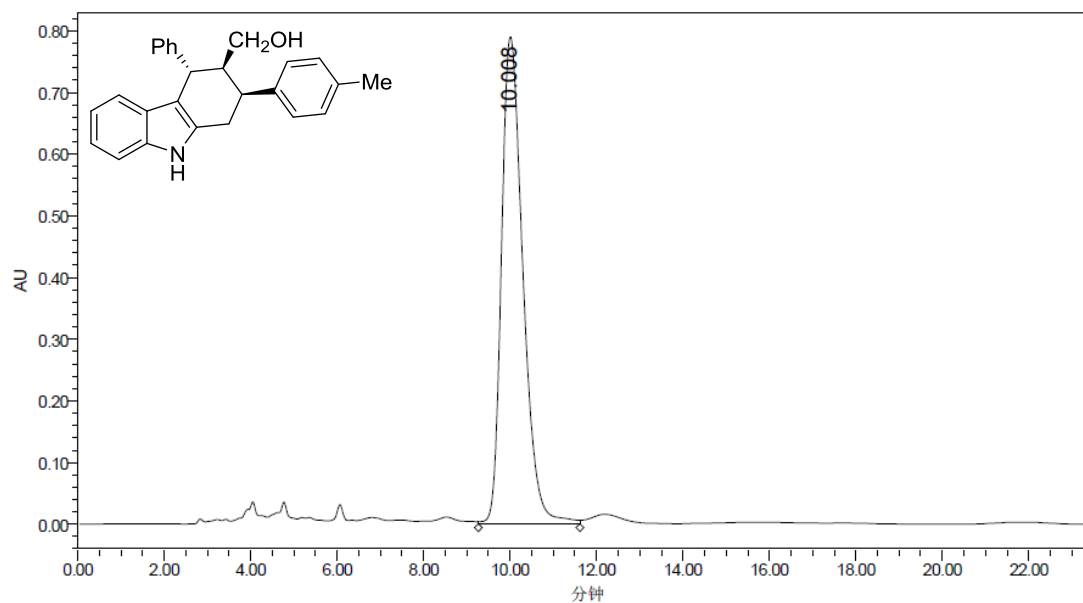

|   | RT<br>(min) | Peak<br>Type | Area<br>(礦*sec) | % Area | Height<br>(礦) | % Height | Integration<br>Type | Points<br>Across Peak | Start<br>Time<br>(min) | End<br>Time<br>(min) |
|---|-------------|--------------|-----------------|--------|---------------|----------|---------------------|-----------------------|------------------------|----------------------|
| 1 | 10.008      | 未知           | 27138878        | 100.00 | 789499        | 100.00   | VV                  | 141                   | 9.267                  | 11.617               |

**((2S,3S,4S)-2-(4-fluorophenyl)-4-phenyl-2,3,4,9-tetrahydro-1H-carbazol-3-yl)methanol (4ac)**

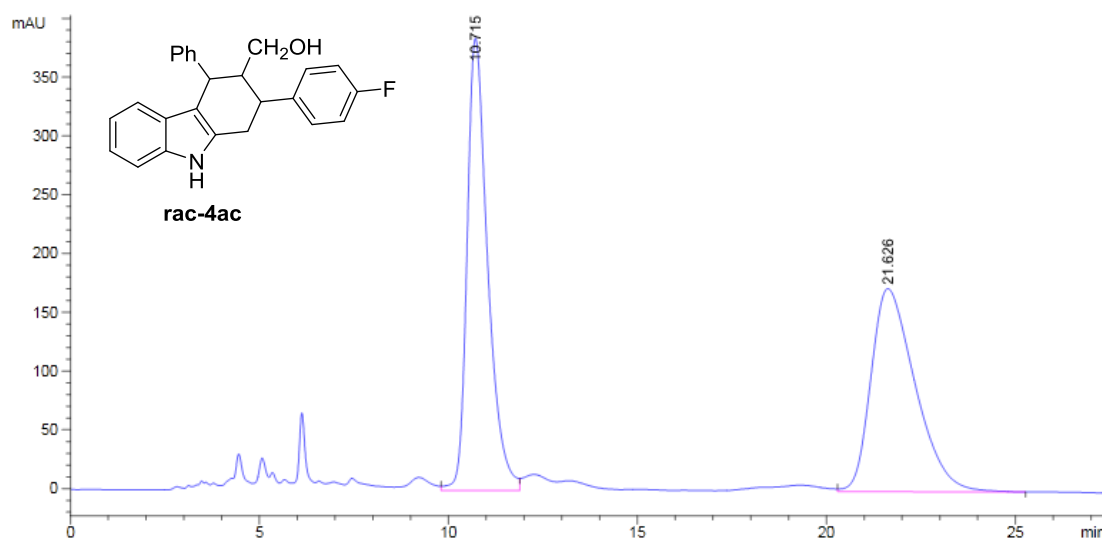

| Peak # | RetTime [min] | Type | Width [min] | Area mAU *s | Height [mAU] | Area %  |
|--------|---------------|------|-------------|-------------|--------------|---------|
| 1      | 10.715        | VV   | 0.5687      | 1.46289e4   | 384.87903    | 51.0383 |
| 2      | 21.626        | VB   | 1.2369      | 1.40337e4   | 172.59236    | 48.9617 |

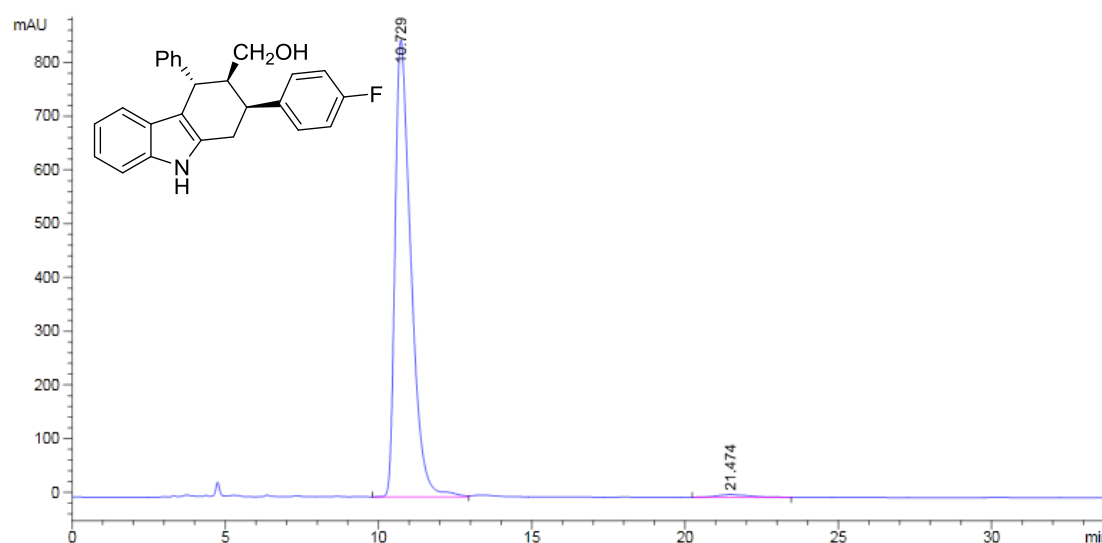

| Peak # | RetTime [min] | Type | Width [min] | Area mAU *s | Height [mAU] | Area %  |
|--------|---------------|------|-------------|-------------|--------------|---------|
| 1      | 10.729        | VV   | 0.5290      | 3.07476e4   | 851.52509    | 98.7780 |
| 2      | 21.474        | BB   | 1.0437      | 380.38828   | 5.03948      | 1.2220  |

**((2S,3S,4S)-2-(4-chlorophenyl)-4-phenyl-2,3,4,9-tetrahydro-1H-carbazol-3-yl)methanol (4ad)**

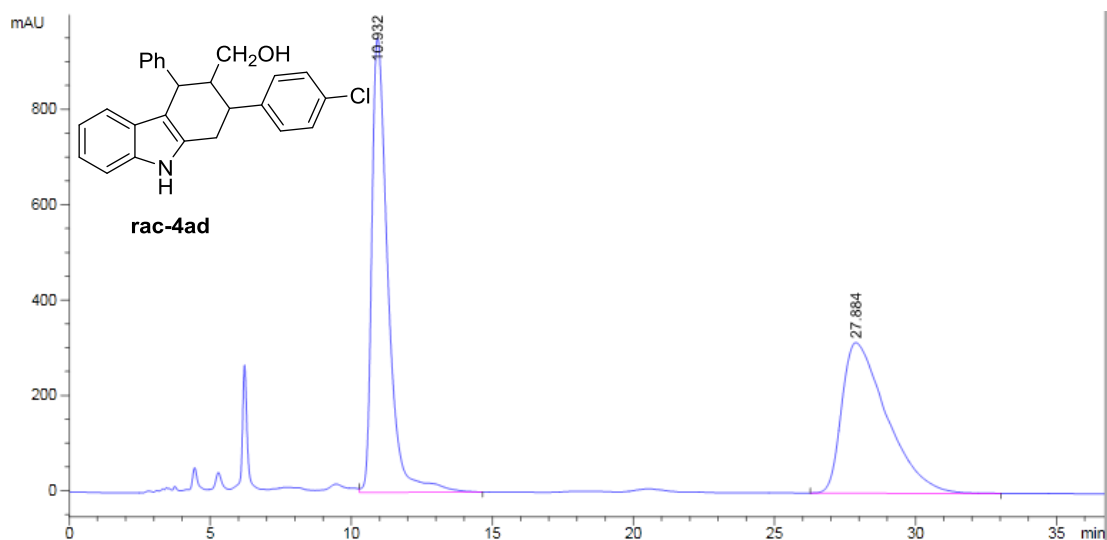

| Peak # | RetTime [min] | Type | Width [min] | Area mAU *s | Height [mAU] | Area %  |
|--------|---------------|------|-------------|-------------|--------------|---------|
| 1      | 10.932        | VB   | 0.6034      | 3.79065e4   | 953.77881    | 52.0585 |
| 2      | 27.884        | BB   | 1.6071      | 3.49086e4   | 315.79773    | 47.9415 |

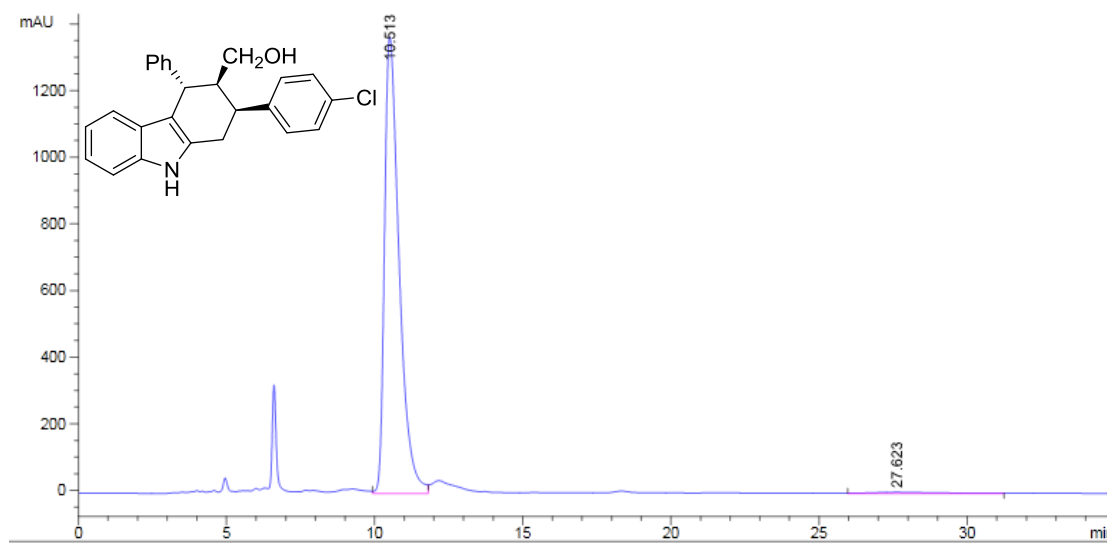

| Peak # | RetTime [min] | Type | Width [min] | Area mAU *s | Height [mAU] | Area %  |
|--------|---------------|------|-------------|-------------|--------------|---------|
| 1      | 10.513        | VV   | 0.5171      | 4.70328e4   | 1369.62402   | 99.0190 |
| 2      | 27.623        | BV   | 1.8724      | 465.96320   | 3.61105      | 0.9810  |

**((2S,3S,4S)-2-(4-bromophenyl)-4-phenyl-2,3,4,9-tetrahydro-1H-carbazol-3-yl)methanol (4ae)**

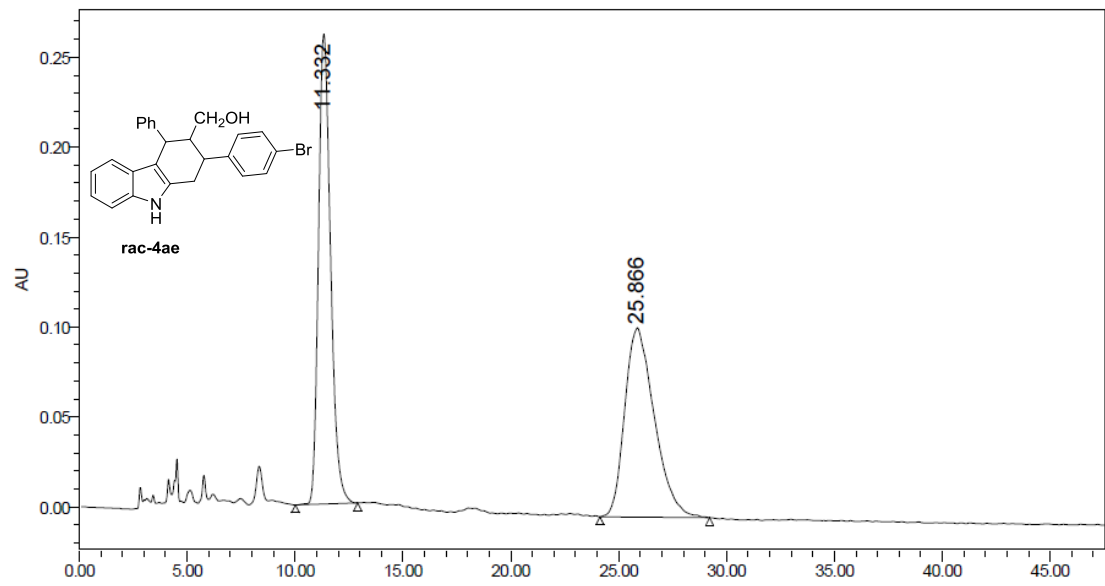

|   | RT (min) | Peak Type | Area (礦*sec) | % Area | Height (礦) | % Height | Integration Type | Points Across Peak | Start Time (min) | End Time (min) |
|---|----------|-----------|--------------|--------|------------|----------|------------------|--------------------|------------------|----------------|
| 1 | 11.332   | 未知        | 10175629     | 50.34  | 261227     | 71.29    | BB               | 173                | 10.017           | 12.900         |
| 2 | 25.866   | 未知        | 10038398     | 49.66  | 105219     | 28.71    | BB               | 305                | 24.133           | 29.217         |

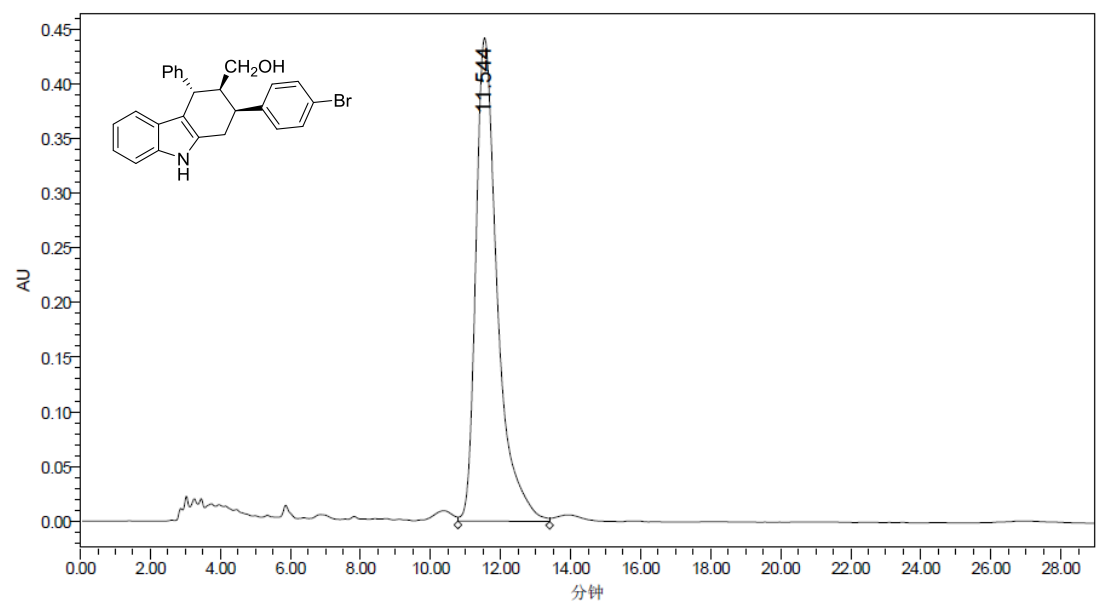

|   | RT (min) | Peak Type | Area (礦*sec) | % Area | Height (礦) | % Height | Integration Type | Points Across Peak | Start Time (min) | End Time (min) |
|---|----------|-----------|--------------|--------|------------|----------|------------------|--------------------|------------------|----------------|
| 1 | 11.544   | 未知        | 18847596     | 100.00 | 441664     | 100.00   | VV               | 157                | 10.783           | 13.400         |

**((2S,3S,4S)-2-(2-bromophenyl)-4-phenyl-2,3,4,9-tetrahydro-1H-carbazol-3-yl)methanol (4af)**

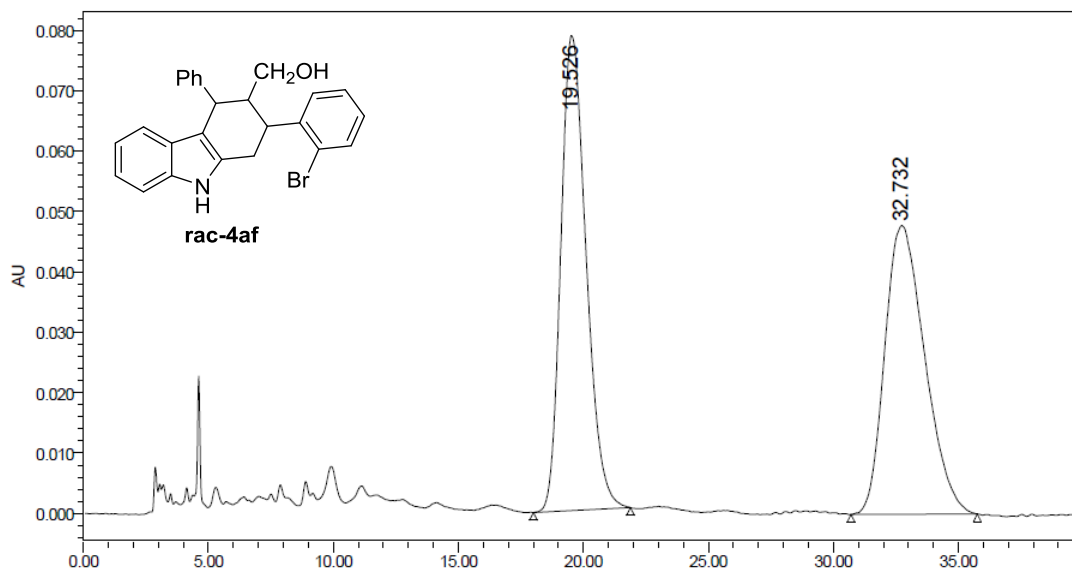

|   | RT<br>(min) | Peak<br>Type | Area<br>(AU*sec) | % Area | Height<br>(AU) | % Height | Integration<br>Type | Points<br>Across Peak | Start<br>Time<br>(min) | End<br>Time<br>(min) |
|---|-------------|--------------|------------------|--------|----------------|----------|---------------------|-----------------------|------------------------|----------------------|
| 1 | 19.526      | 未知           | 5523144          | 50.96  | 78665          | 62.20    | BB                  | 233                   | 18.000                 | 21.883               |
| 2 | 32.732      | 未知           | 5315962          | 49.04  | 47811          | 37.80    | BB                  | 303                   | 30.700                 | 35.750               |

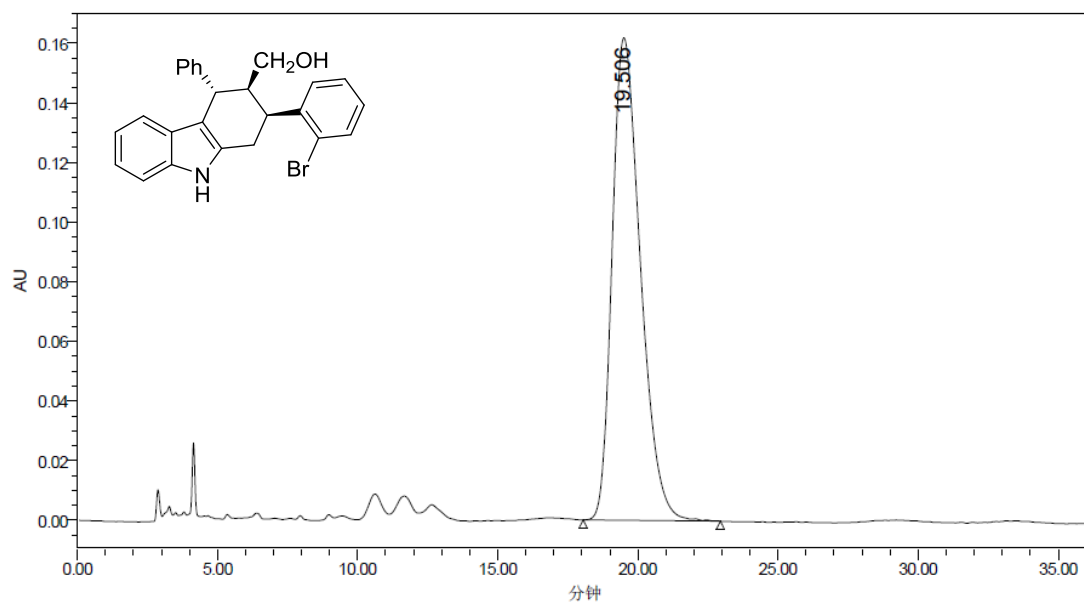

|   | RT<br>(min) | Peak<br>Type | Area<br>(AU*sec) | % Area | Height<br>(AU) | % Height | Integration<br>Type | Points<br>Across Peak | Start<br>Time<br>(min) | End<br>Time<br>(min) |
|---|-------------|--------------|------------------|--------|----------------|----------|---------------------|-----------------------|------------------------|----------------------|
| 1 | 19.506      | 未知           | 11353268         | 100.00 | 161831         | 100.00   | BB                  | 294                   | 18.050                 | 22.950               |

**((2S,3S,4S)-2-(2-methoxyphenyl)-4-phenyl-2,3,4,9-tetrahydro-1H-carbazol-3-yl)  
methanol (4ag)**

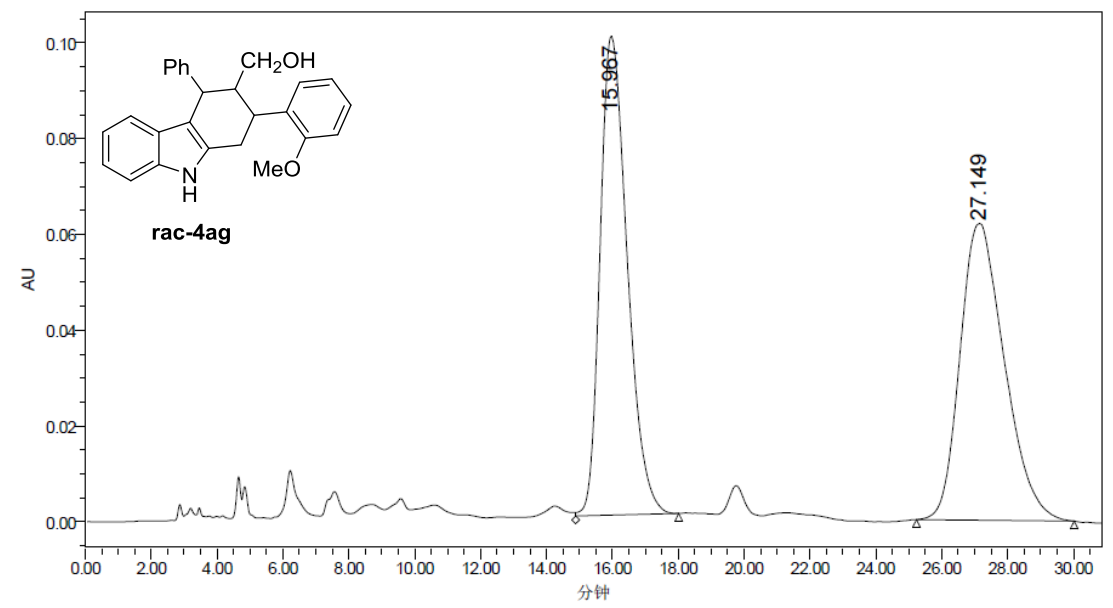

|   | RT<br>(min) | Peak<br>Type | Area<br>(礦*sec) | % Area | Height<br>(礦) | % Height | Integration<br>Type | Points<br>Across Peak | Start<br>Time<br>(min) | End<br>Time<br>(min) |
|---|-------------|--------------|-----------------|--------|---------------|----------|---------------------|-----------------------|------------------------|----------------------|
| 1 | 15.967      | 未知           | 5738745         | 49.74  | 100015        | 61.77    | VB                  | 188                   | 14.883                 | 18.017               |
| 2 | 27.149      | 未知           | 5798001         | 50.26  | 61904         | 38.23    | BB                  | 287                   | 25.233                 | 30.017               |

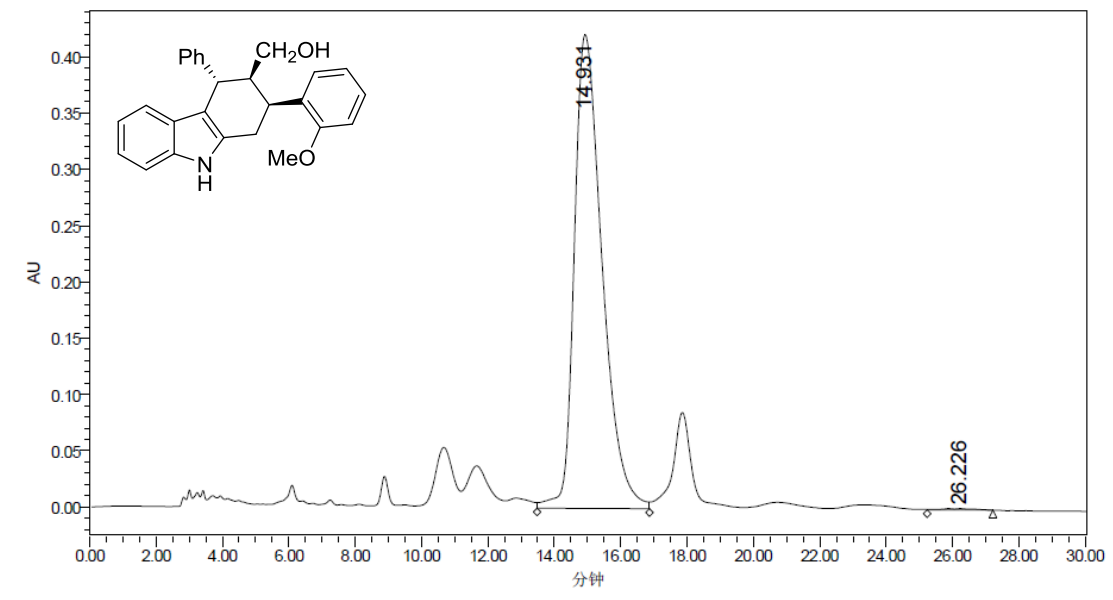

|   | RT<br>(min) | Peak<br>Type | Area<br>(礦*sec) | % Area | Height<br>(礦) | % Height | Integration<br>Type | Points<br>Across Peak | Start<br>Time<br>(min) | End<br>Time<br>(min) |
|---|-------------|--------------|-----------------|--------|---------------|----------|---------------------|-----------------------|------------------------|----------------------|
| 1 | 14.931      | 未知           | 24610269        | 99.65  | 420912        | 99.72    | VV                  | 203                   | 13.483                 | 16.867               |
| 2 | 26.226      | 未知           | 86757           | 0.35   | 1192          | 0.28     | VB                  | 119                   | 25.233                 | 27.217               |

**((2S,3S,4S)-2-(naphthalen-1-yl)-4-phenyl-2,3,4,9-tetrahydro-1H-carbazol-3-yl)methanol (4ah)**

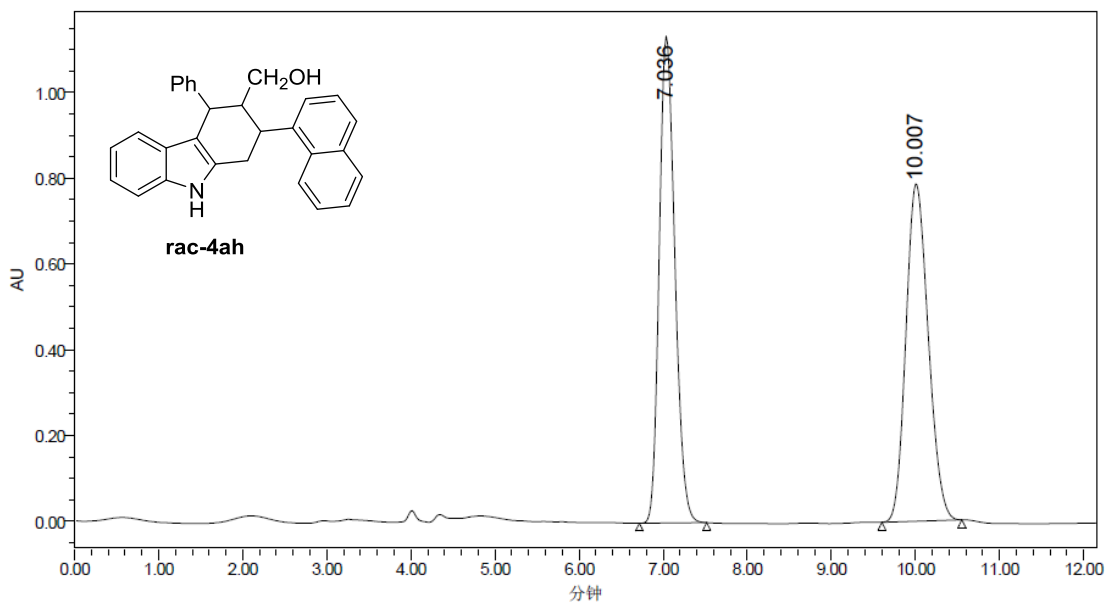

|   | RT<br>(min) | Peak<br>Type | Area<br>(礦*sec) | % Area | Height<br>(礦) | % Height | Integration<br>Type | Points<br>Across Peak | Start<br>Time<br>(min) | End<br>Time<br>(min) |
|---|-------------|--------------|-----------------|--------|---------------|----------|---------------------|-----------------------|------------------------|----------------------|
| 1 | 7.036       | 未知           | 14674588        | 50.17  | 1136433       | 59.05    | BB                  | 48                    | 6.717                  | 7.517                |
| 2 | 10.007      | 未知           | 14575432        | 49.83  | 788173        | 40.95    | BB                  | 57                    | 9.600                  | 10.550               |

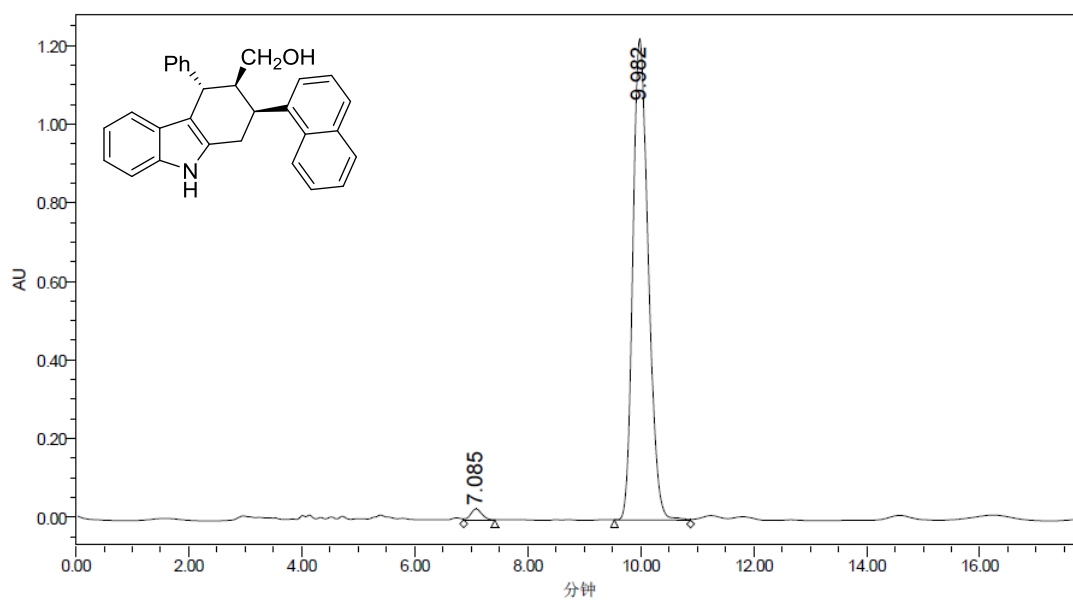

|   | RT<br>(min) | Peak<br>Type | Area<br>(礦*sec) | % Area | Height<br>(礦) | % Height | Integration<br>Type | Points<br>Across Peak | Start<br>Time<br>(min) | End<br>Time<br>(min) |
|---|-------------|--------------|-----------------|--------|---------------|----------|---------------------|-----------------------|------------------------|----------------------|
| 1 | 7.085       | 未知           | 375904          | 1.60   | 28058         | 2.24     | VB                  | 33                    | 6.867                  | 7.417                |
| 2 | 9.982       | 未知           | 23178136        | 98.40  | 1224486       | 97.76    | BV                  | 81                    | 9.533                  | 10.883               |

**((2S,3S,4S)-4-phenyl-2-(thiophen-3-yl)-2,3,4,9-tetrahydro-1H-carbazol-3-yl)methanol (4ai)**

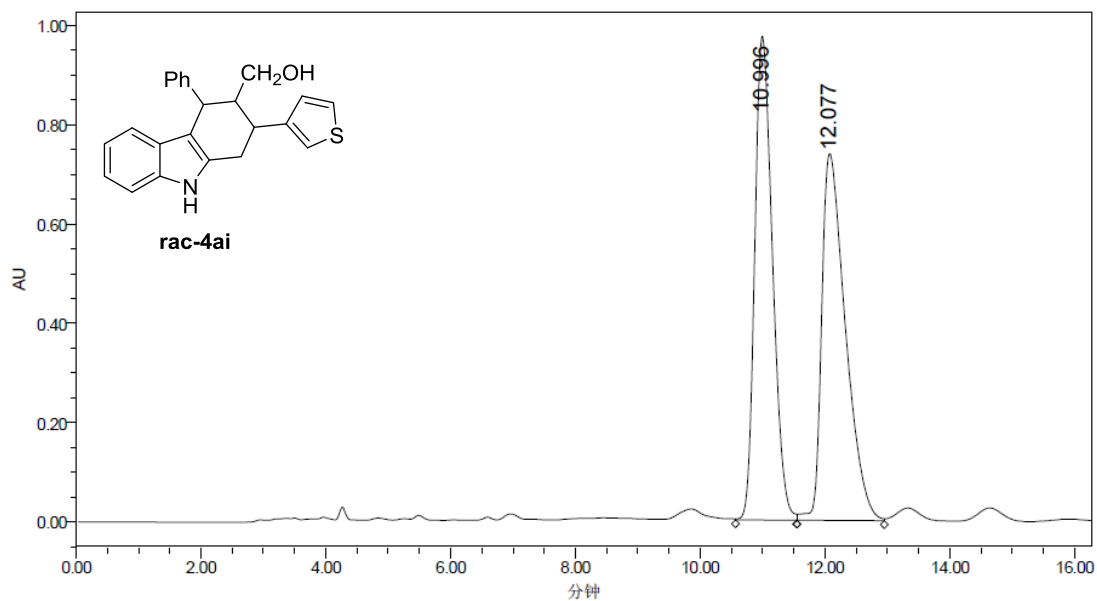

|   | RT<br>(min) | Peak<br>Type | Area<br>(礦*sec) | % Area | Height<br>(礦) | % Height | Integration<br>Type | Points<br>Across Peak | Start<br>Time<br>(min) | End<br>Time<br>(min) |
|---|-------------|--------------|-----------------|--------|---------------|----------|---------------------|-----------------------|------------------------|----------------------|
| 1 | 10.996      | 未知           | 19214650        | 49.58  | 974011        | 56.86    | VV                  | 59                    | 10.567                 | 11.550               |
| 2 | 12.077      | 未知           | 19542497        | 50.42  | 738840        | 43.14    | VV                  | 84                    | 11.550                 | 12.950               |

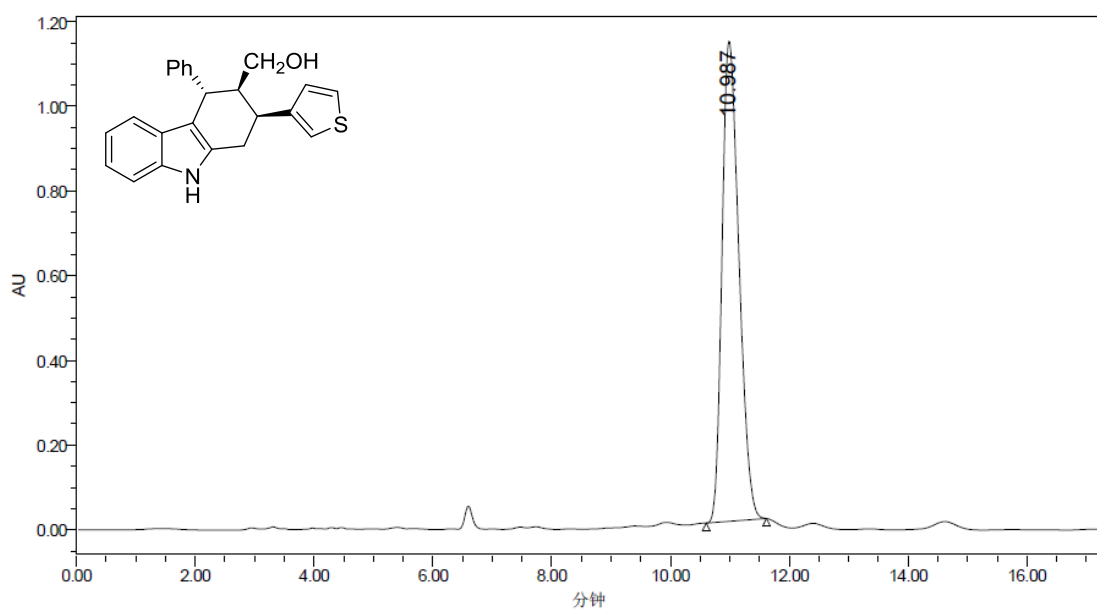

|   | RT<br>(min) | Peak<br>Type | Area<br>(礦*sec) | % Area | Height<br>(礦) | % Height | Integration<br>Type | Points<br>Across Peak | Start<br>Time<br>(min) | End<br>Time<br>(min) |
|---|-------------|--------------|-----------------|--------|---------------|----------|---------------------|-----------------------|------------------------|----------------------|
| 1 | 10.987      | 未知           | 22426811        | 100.00 | 1134957       | 100.00   | BB                  | 61                    | 10.600                 | 11.617               |



**((2S,3R,4S)-4-phenyl-2-(thiophen-2-yl)-2,3,4,9-tetrahydro-1H-carbazol-3-yl)methanol (4aj)**

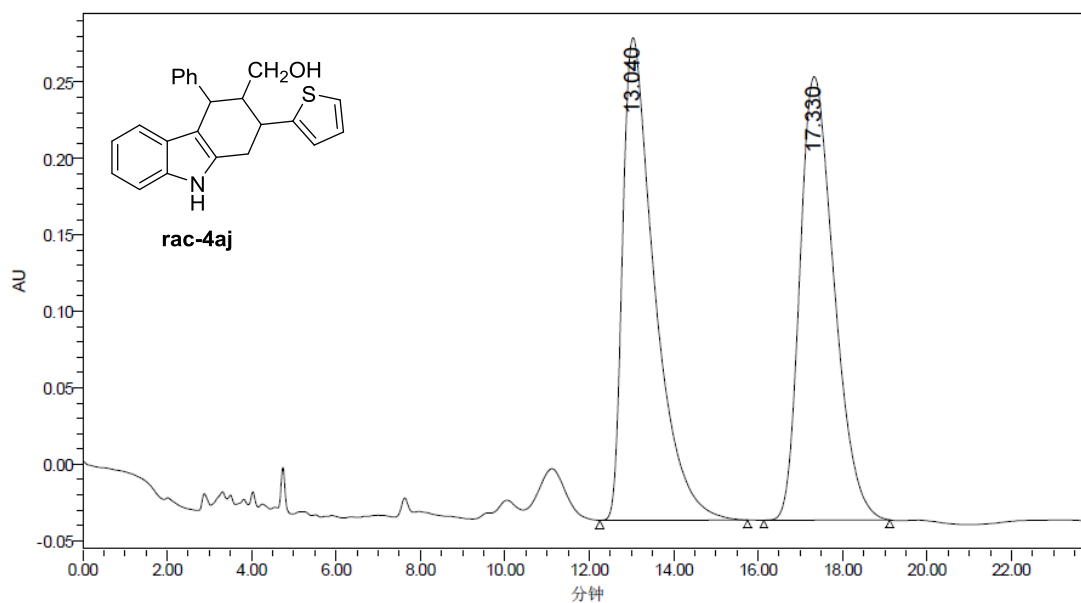

|   | RT<br>(min) | Peak<br>Type | Area<br>(礦*sec) | % Area | Height<br>(礦) | % Height | Integration<br>Type | Points<br>Across Peak | Start<br>Time<br>(min) | End<br>Time<br>(min) |
|---|-------------|--------------|-----------------|--------|---------------|----------|---------------------|-----------------------|------------------------|----------------------|
| 1 | 13.040      | 未知           | 16548907        | 50.38  | 315566        | 52.12    | BB                  | 210                   | 12.250                 | 15.750               |
| 2 | 17.330      | 未知           | 16298871        | 49.62  | 289917        | 47.88    | BB                  | 179                   | 16.133                 | 19.117               |

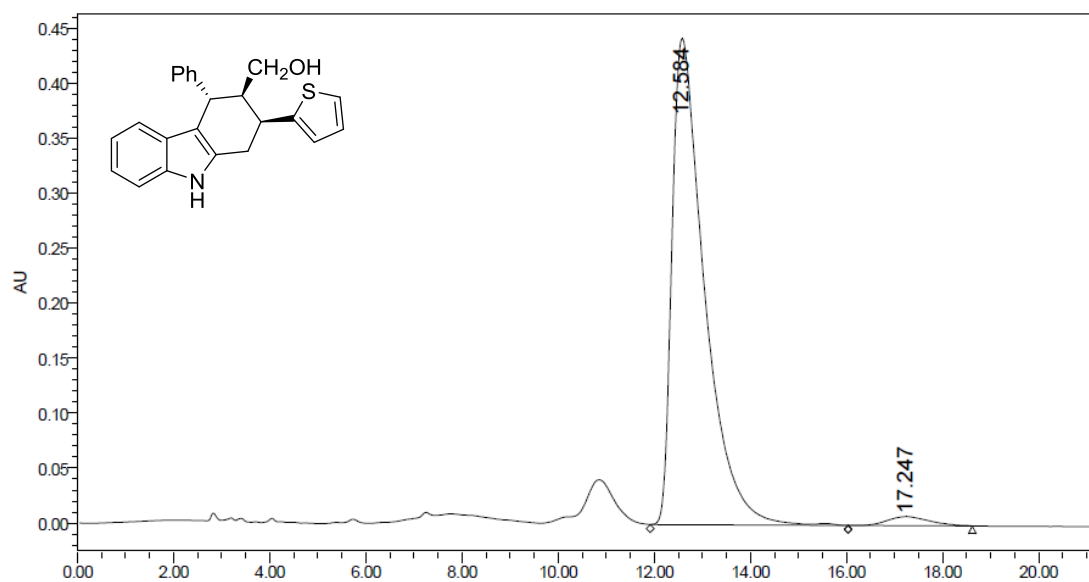

|   | RT<br>(min) | Peak<br>Type | Area<br>(礦*sec) | % Area | Height<br>(礦) | % Height | Integration<br>Type | Points<br>Across Peak | Start<br>Time<br>(min) | End<br>Time<br>(min) |
|---|-------------|--------------|-----------------|--------|---------------|----------|---------------------|-----------------------|------------------------|----------------------|
| 1 | 12.584      | 未知           | 20719213        | 97.68  | 442216        | 98.18    | VV                  | 247                   | 11.917                 | 16.033               |
| 2 | 17.247      | 未知           | 492540          | 2.32   | 8183          | 1.82     | VB                  | 155                   | 16.033                 | 18.617               |

**((2S,3R,4S)-2-(furan-2-yl)-4-phenyl-2,3,4,9-tetrahydro-1H-carbazol-3-yl)methanol (4ak)**

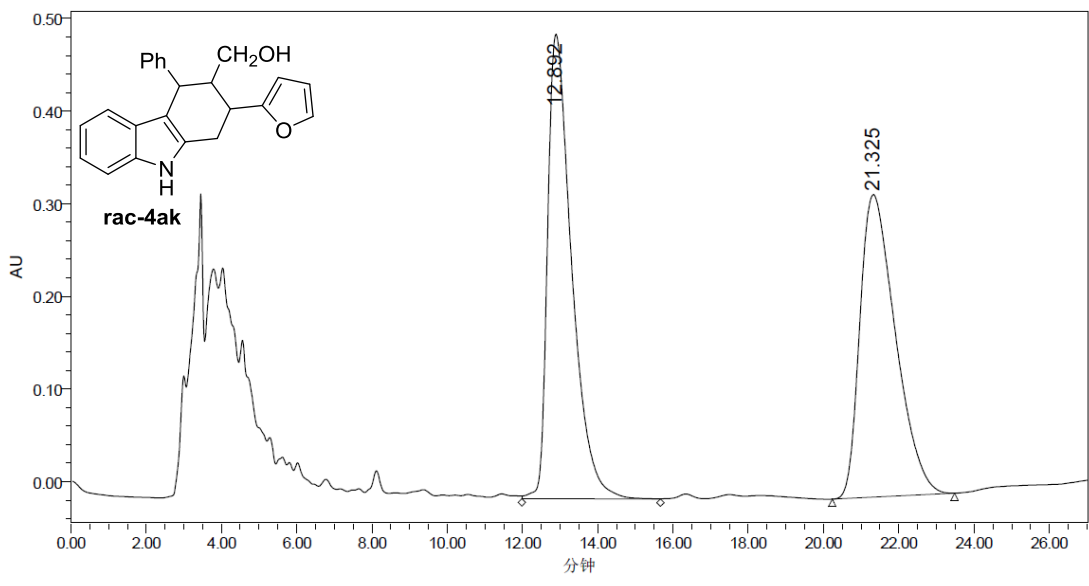

|   | RT<br>(min) | Area<br>(礦*sec) | % Area | Height<br>(礦) | % Height |
|---|-------------|-----------------|--------|---------------|----------|
| 1 | 12.892      | 22300860        | 51.01  | 501315        | 60.55    |
| 2 | 21.325      | 21419911        | 48.99  | 326610        | 39.45    |

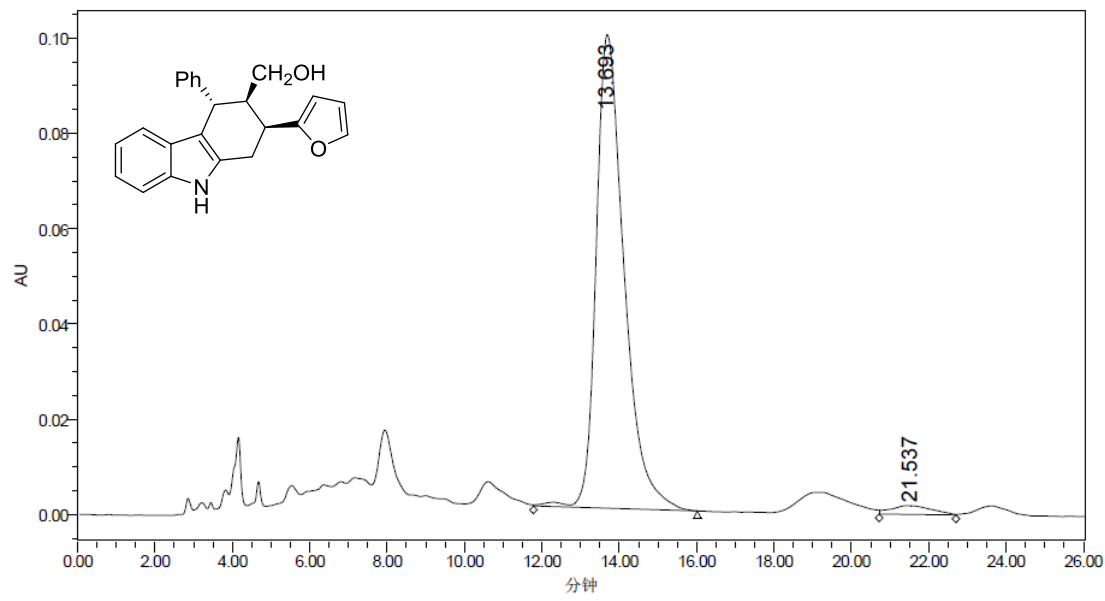

|   | RT<br>(min) | Peak<br>Type | Area<br>(礦*sec) | % Area | Height<br>(礦) | % Height | Integration<br>Type | Points<br>Across Peak | Start<br>Time<br>(min) | End<br>Time<br>(min) |
|---|-------------|--------------|-----------------|--------|---------------|----------|---------------------|-----------------------|------------------------|----------------------|
| 1 | 13.693      | 未知           | 4996193         | 97.39  | 99401         | 98.23    | VB                  | 254                   | 11.783                 | 16.017               |
| 2 | 21.537      | 未知           | 133882          | 2.61   | 1789          | 1.77     | VV                  | 119                   | 20.717                 | 22.700               |

**methyl(E)-3-((2S,3S,4S)-2,4-diphenyl-2,3,4,9-tetrahydro-1H-carbazol-3-yl)acrylate**

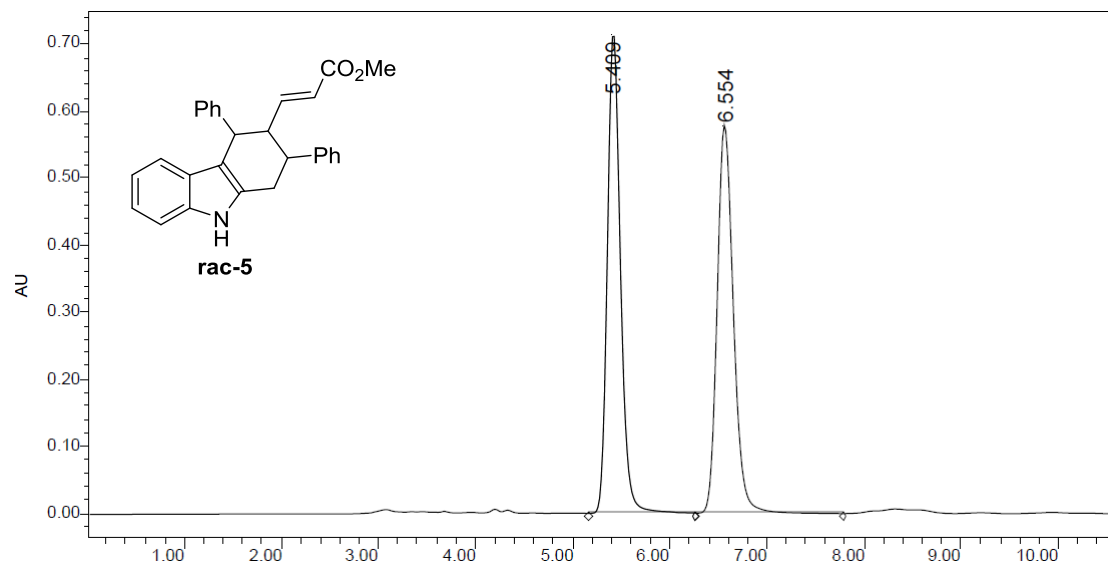

|   | RT<br>(min) | Area<br>( $\Delta V \cdot \text{sec}$ ) | % Area | Height<br>( $\Delta V$ ) | % Height |
|---|-------------|-----------------------------------------|--------|--------------------------|----------|
| 1 | 5.409       | 6812378                                 | 49.96  | 716606                   | 55.23    |
| 2 | 6.554       | 6823805                                 | 50.04  | 580776                   | 44.77    |

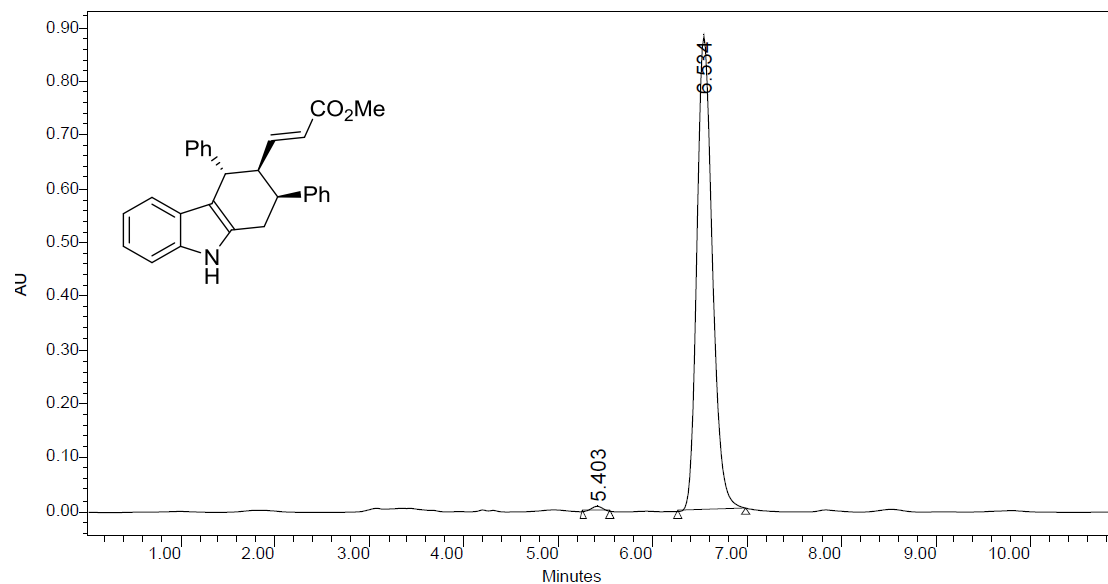

|   | RT<br>(min) | Area<br>( $\Delta V \cdot \text{sec}$ ) | % Area | Height<br>( $\Delta V$ ) | % Height |
|---|-------------|-----------------------------------------|--------|--------------------------|----------|
| 1 | 5.403       | 78732                                   | 0.77   | 9596                     | 1.08     |
| 2 | 6.534       | 10096897                                | 99.23  | 880773                   | 98.92    |

**((2S,3S,4S)-2,4-diphenyl-2,3,4,9-tetrahydro-1H-carbazol-3-yl)methyl  
4-bromobenzoate**

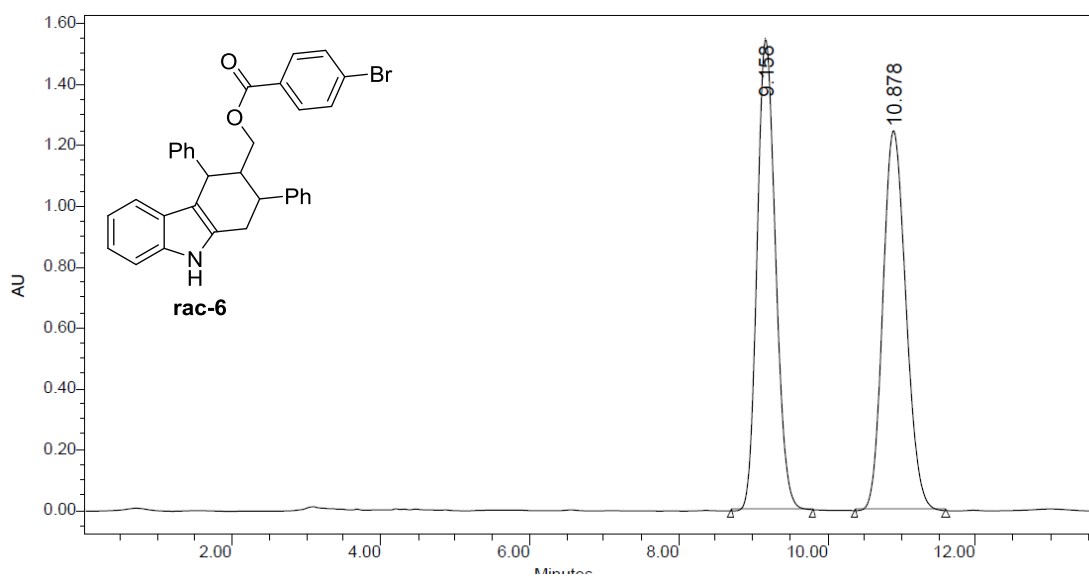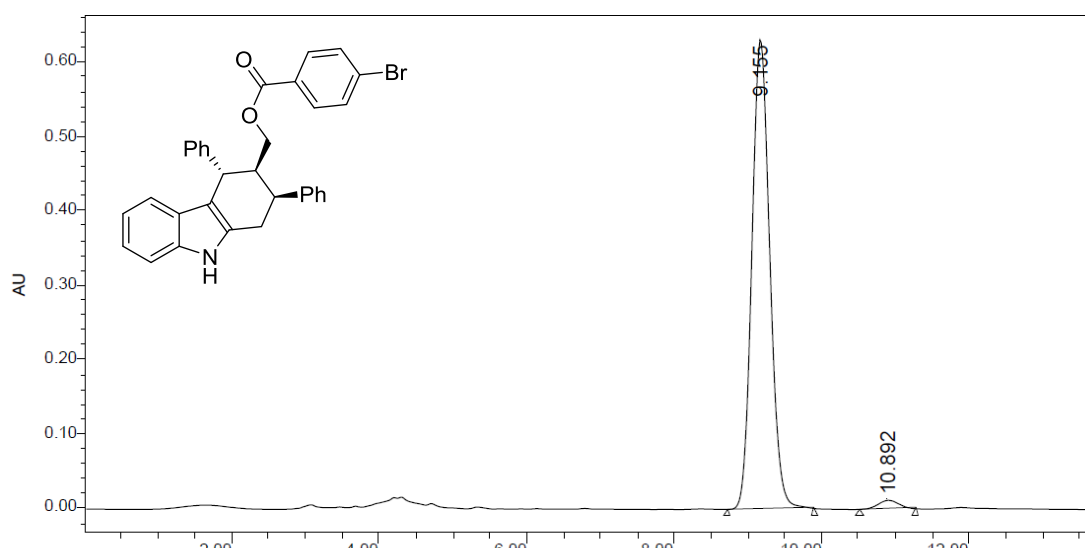

|   | RT (min) | Area (AU*sec) | % Area | Height (AU) | % Height |
|---|----------|---------------|--------|-------------|----------|
| 1 | 9.155    | 10645660      | 97.89  | 631264      | 98.18    |
| 2 | 10.892   | 229882        | 2.11   | 11732       | 1.82     |
